# Supplementary material for: Pentafulvene-derived η3-allyltitanocenes as intermediates for the stereoselective functionalization of 5-membered carbocycles
Source: Royal Society of Chemistry journal article supplement (doi:10.1039/c3cc41826j), 2013-01-01

## Supporting Information

Pentafulvene-derived  $\eta^3$ -allyltitanocenes as intermediates for the stereoselective functionalization of 5-membered carbocycles

Jomy Joseph,<sup>a</sup> Florian Jaroschik,<sup>a</sup> K. V. Radhakrishnan,<sup>b</sup> Jean-Luc Vasse,<sup>\*a</sup> Jan Szymoniak<sup>\*a</sup>

[jean-luc.vasse@univ-reims.fr](mailto:jean-luc.vasse@univ-reims.fr), [jan.szymoniak@univ-reims.fr](mailto:jan.szymoniak@univ-reims.fr)

<sup>a</sup> *Institut de Chimie Moléculaire de Reims, CNRS (UMR 7312) and Université de Reims, 51687 Reims Cedex 2, France.*

<sup>b</sup> *National Institute for Interdisciplinary Science and Technology, (CSIR-NIIST), Industrial Estate P. O., Trivandrum-19, Kerala, India*

**<sup>1</sup>H and <sup>13</sup>C NMR spectra of new compounds**

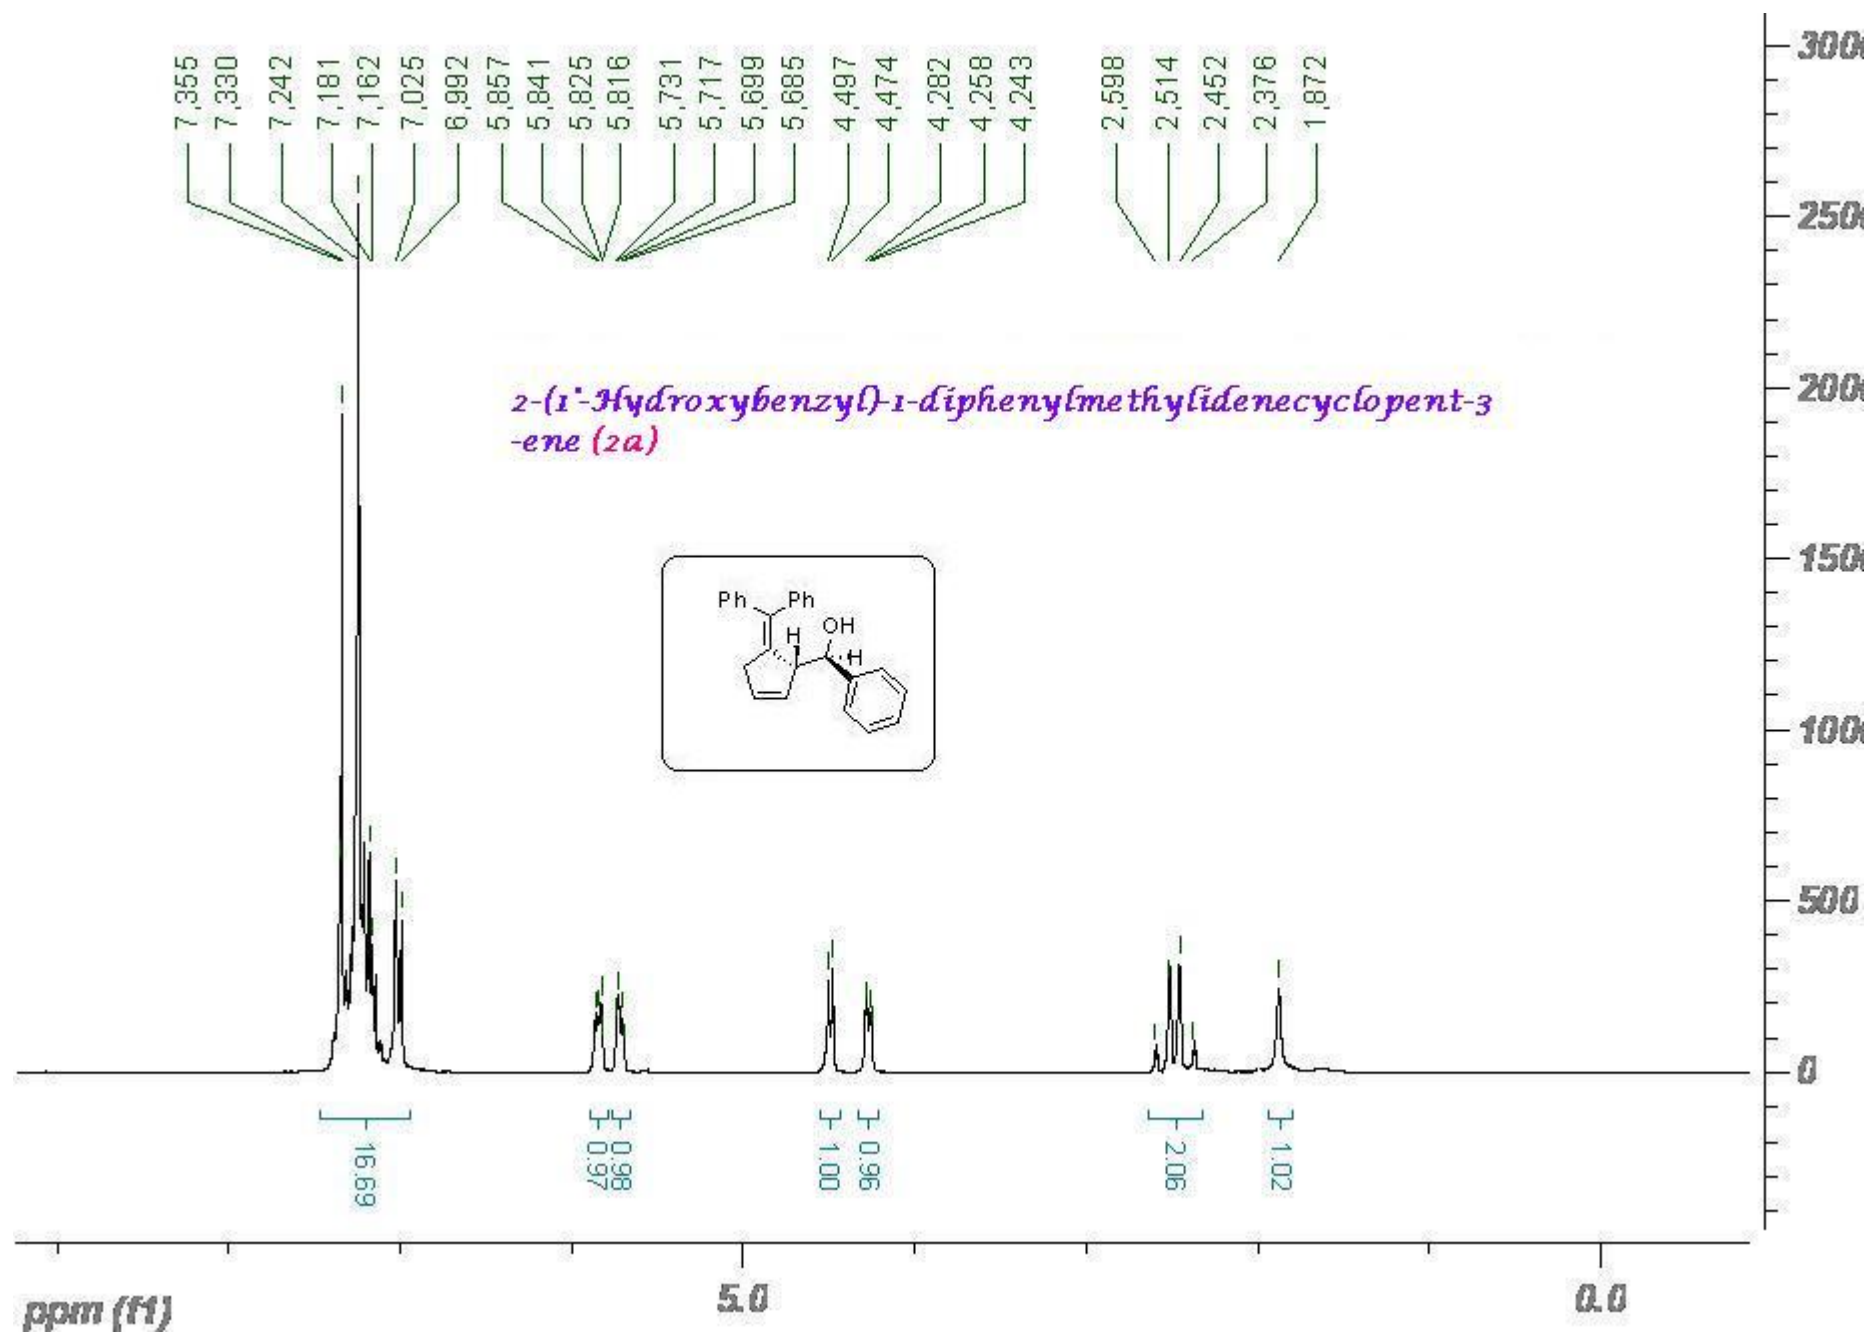

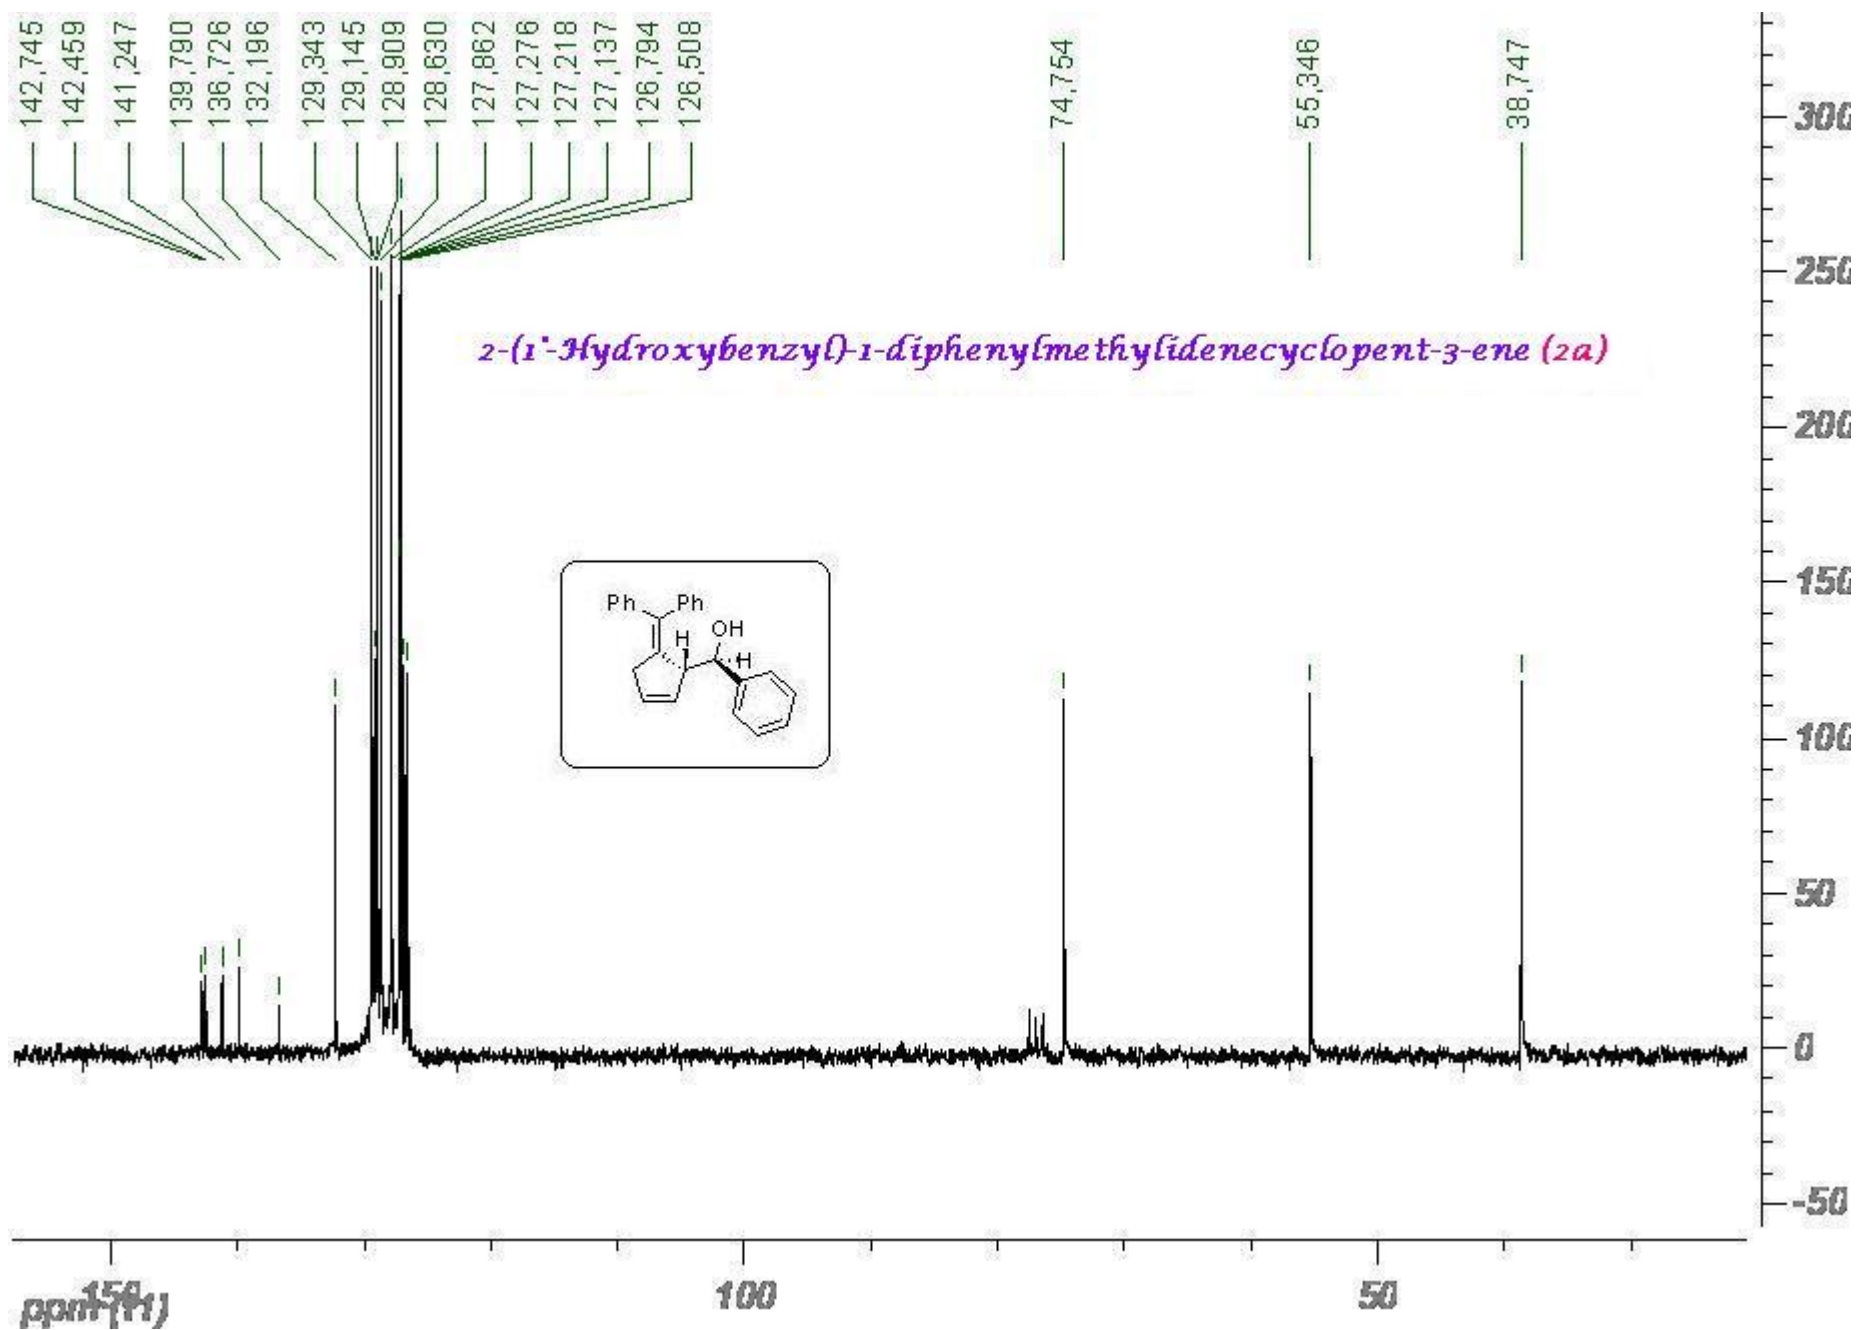

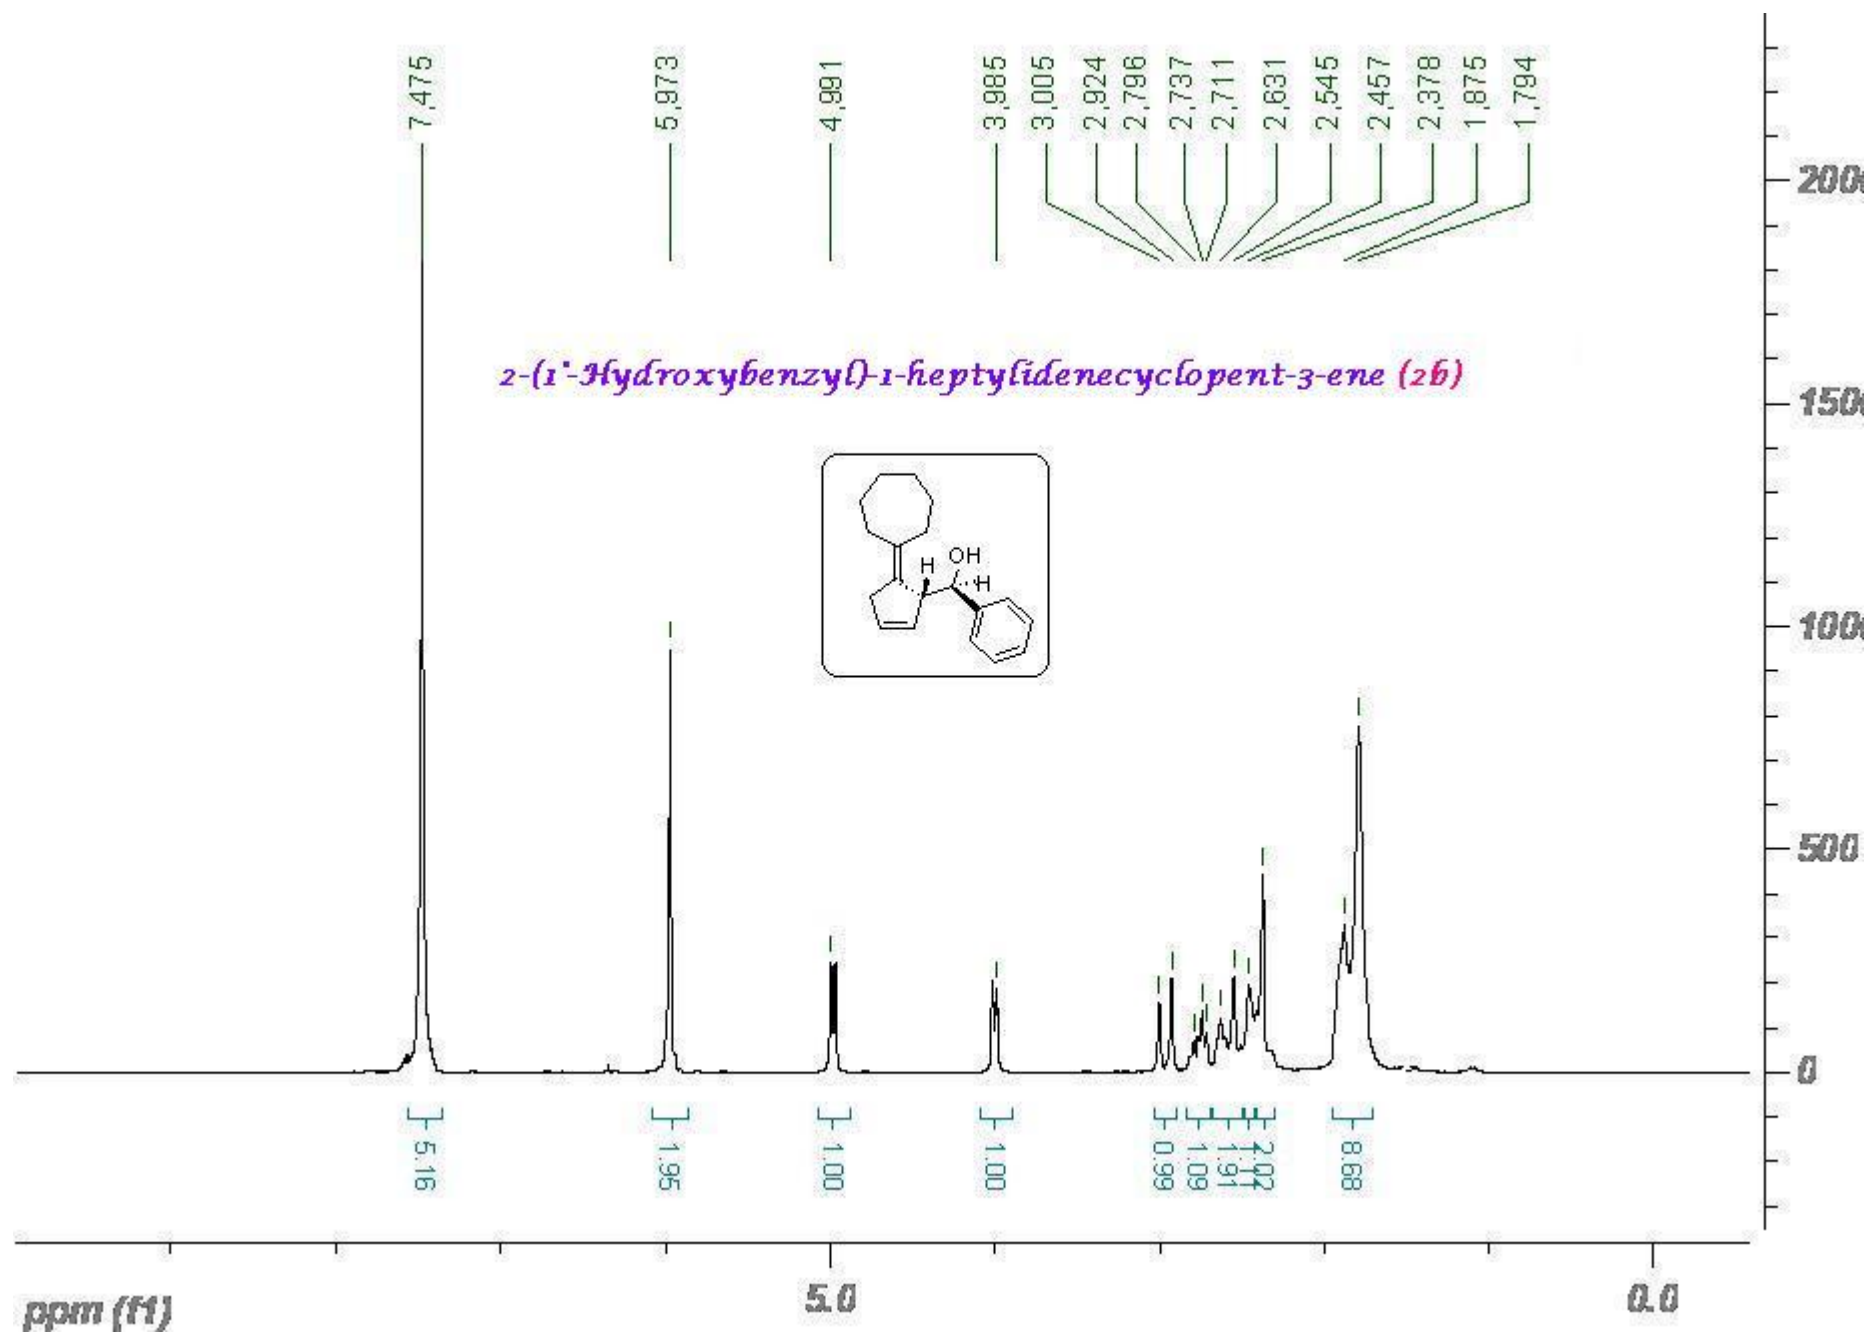

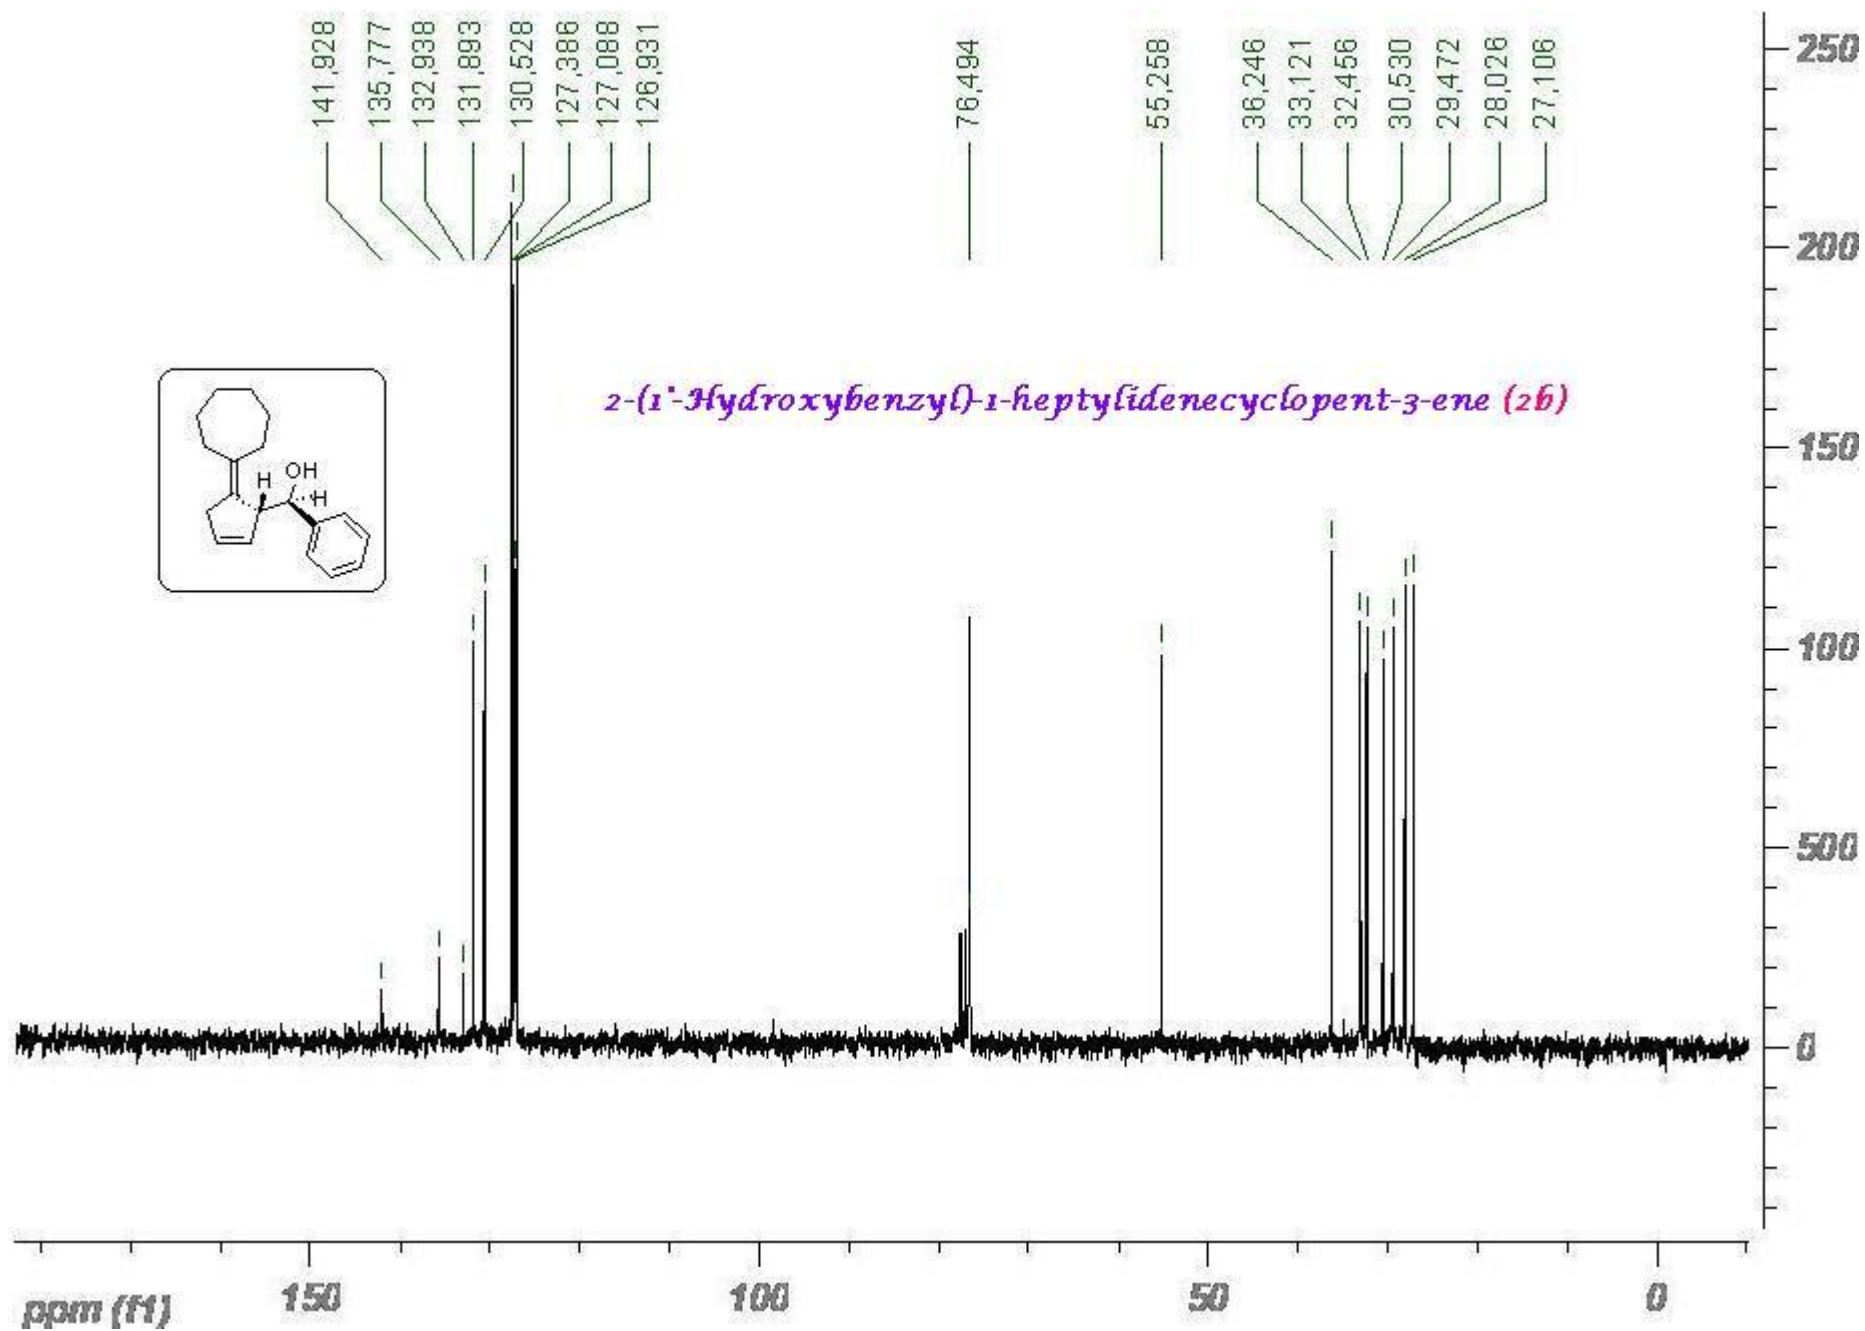

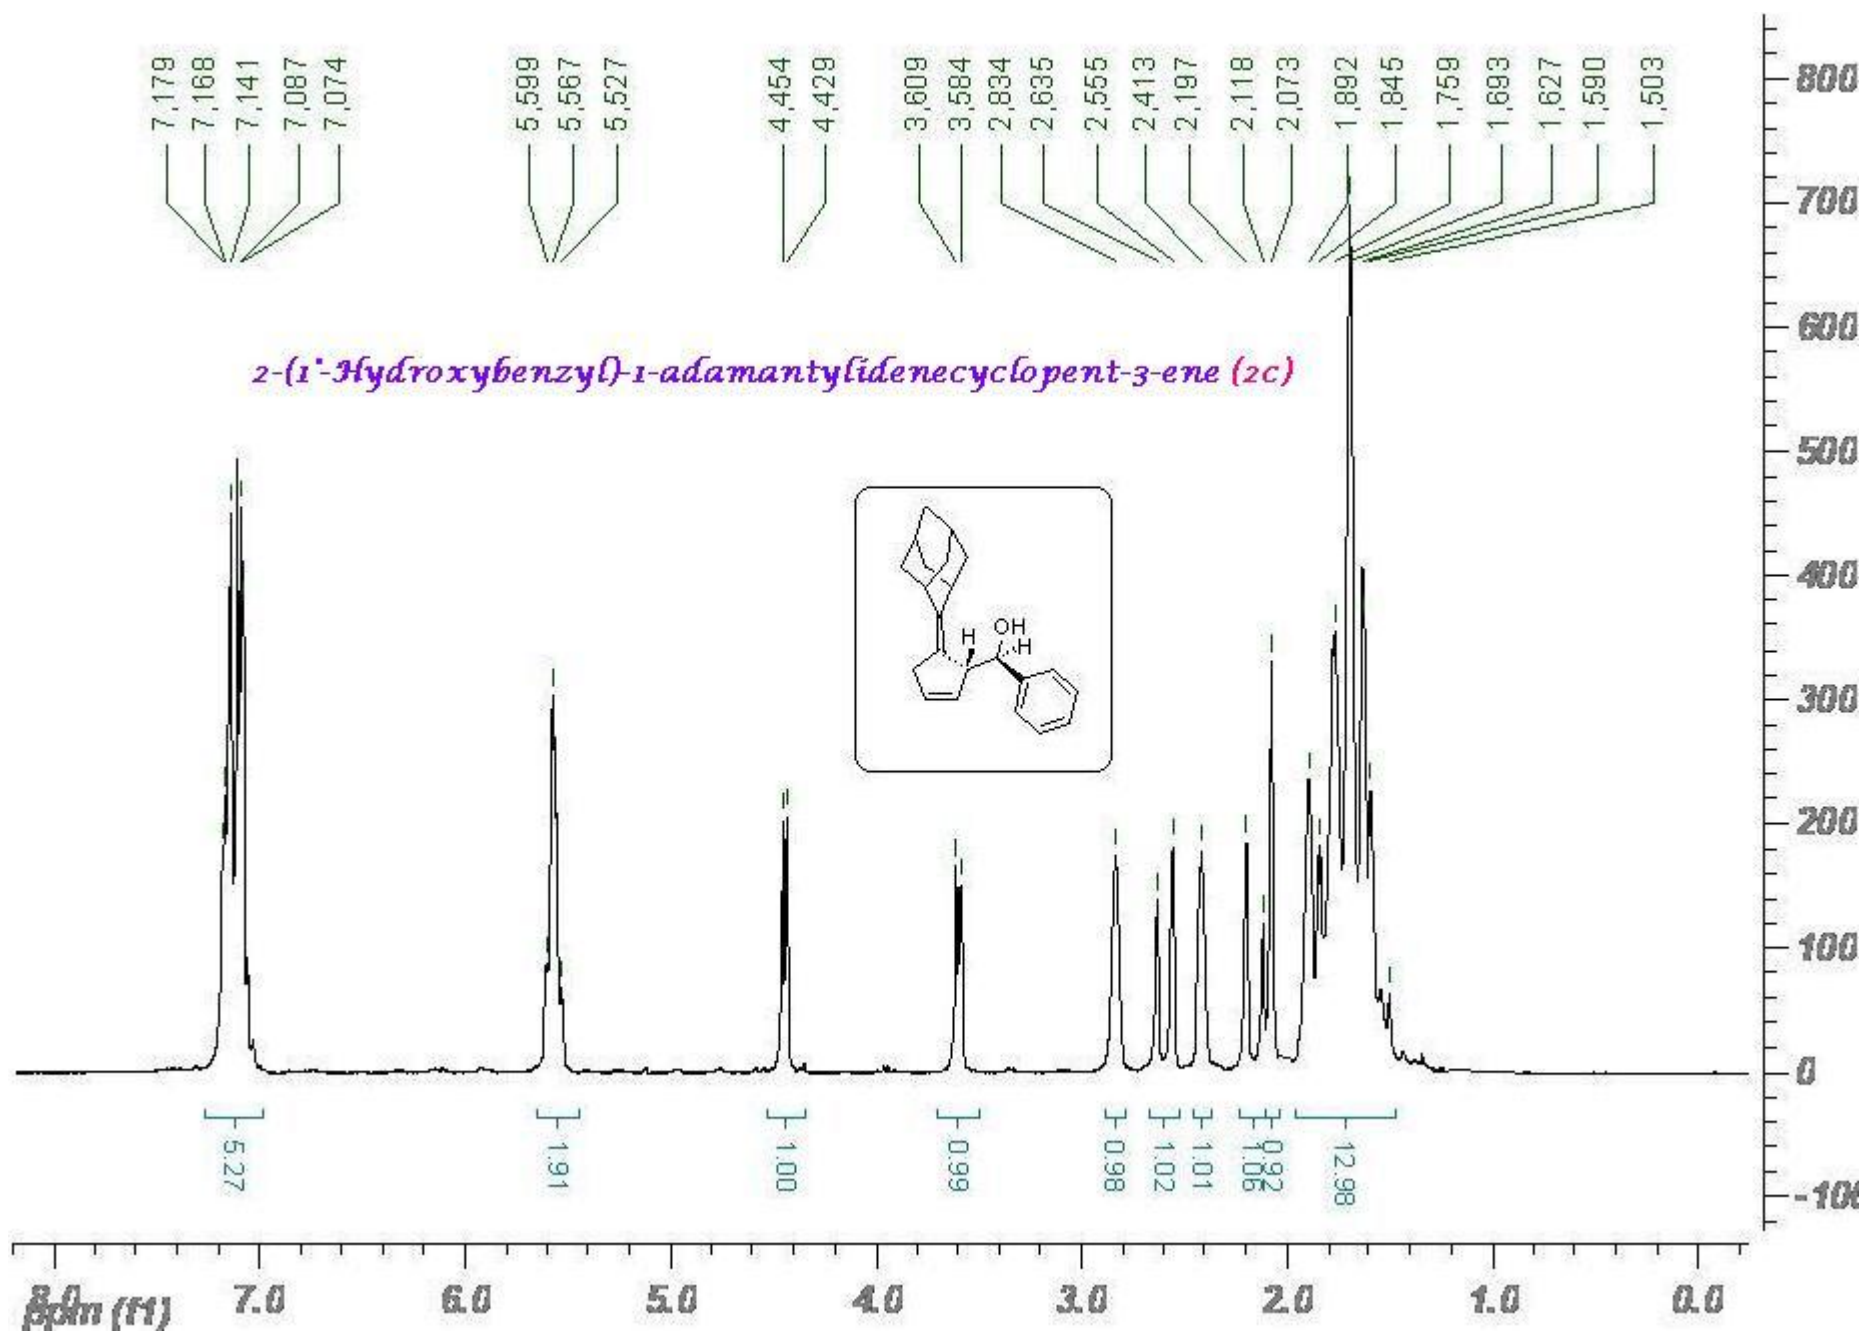

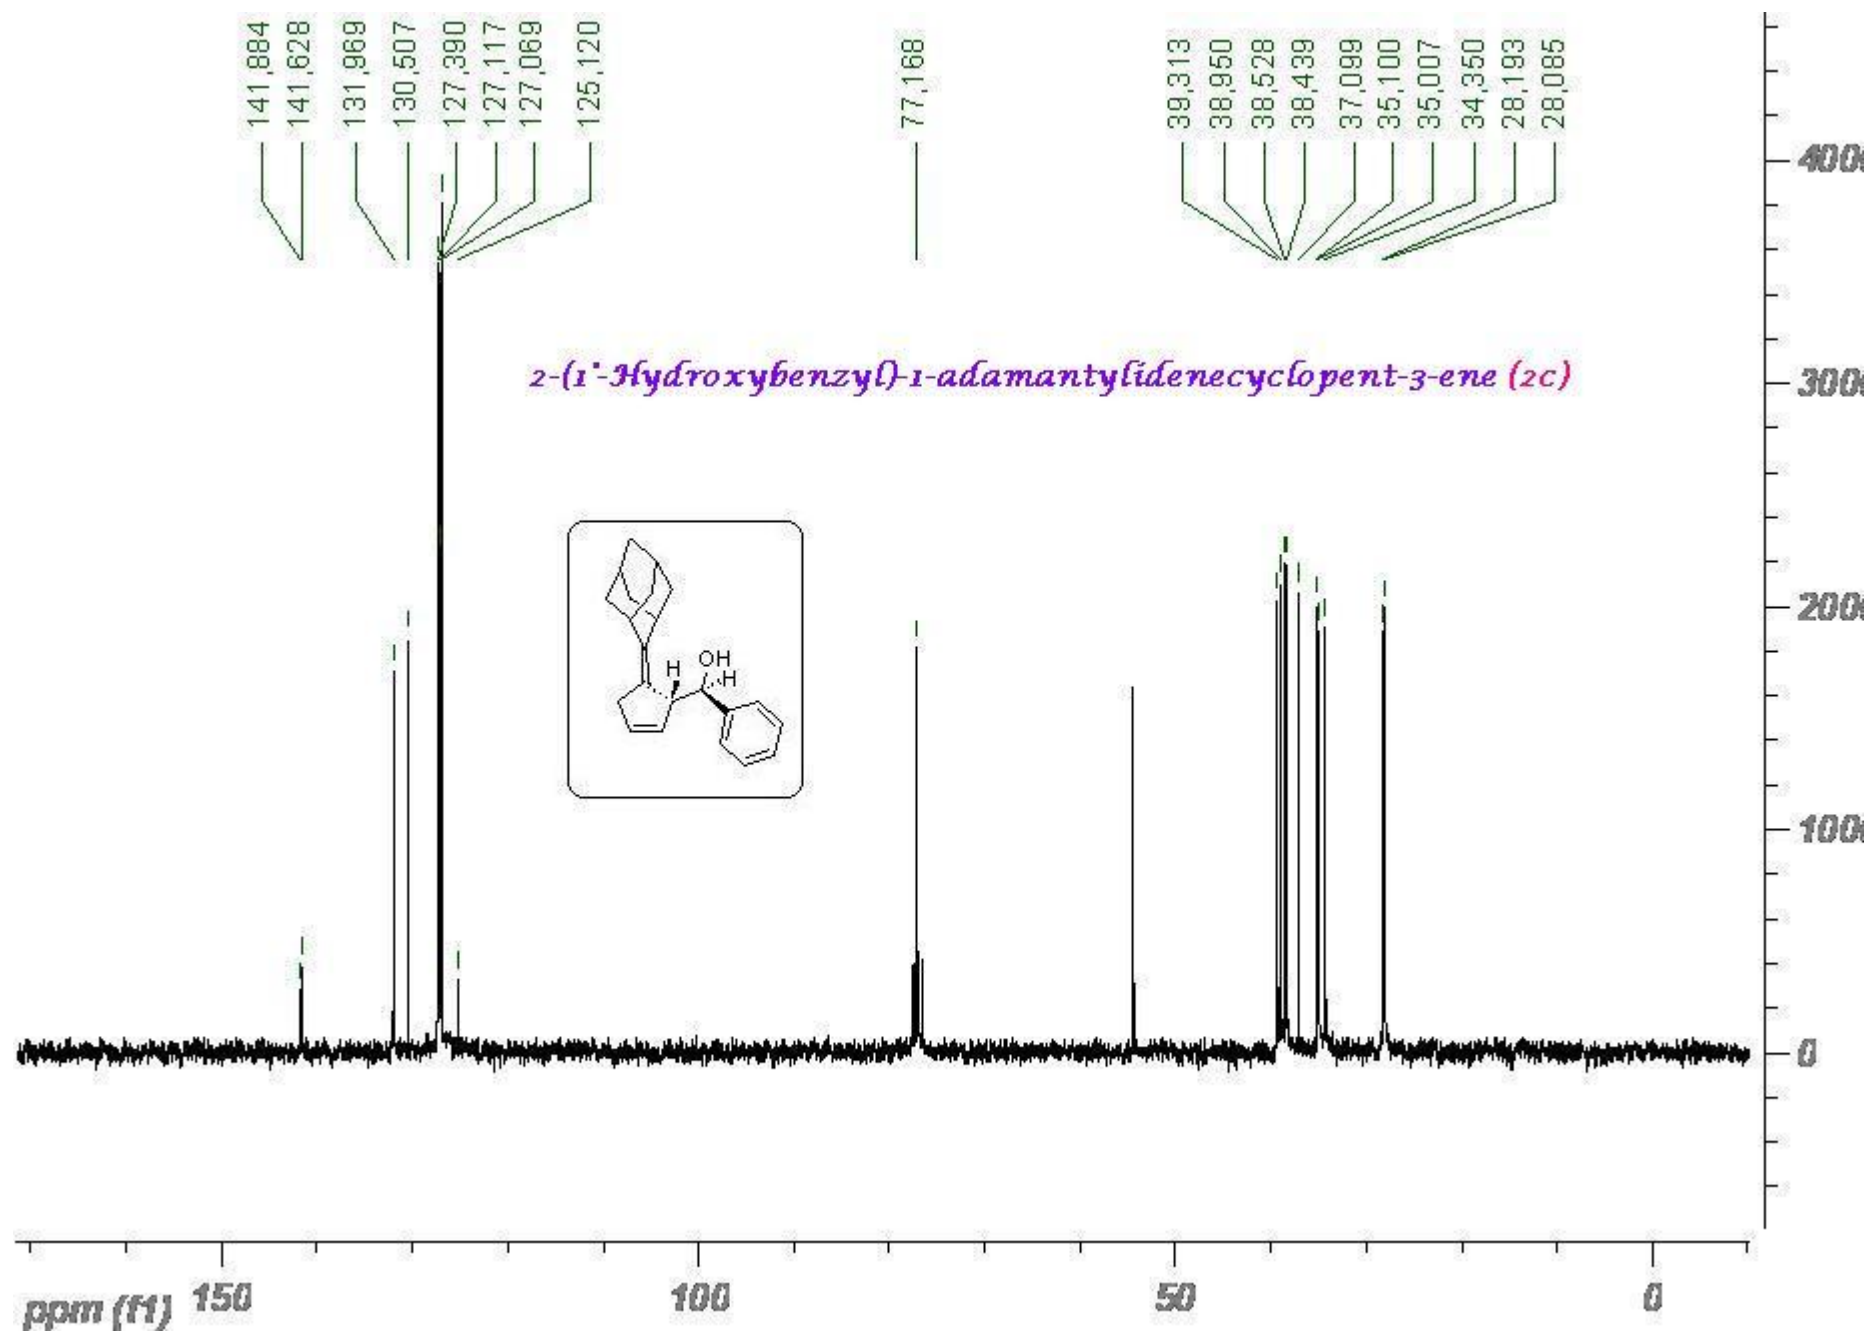

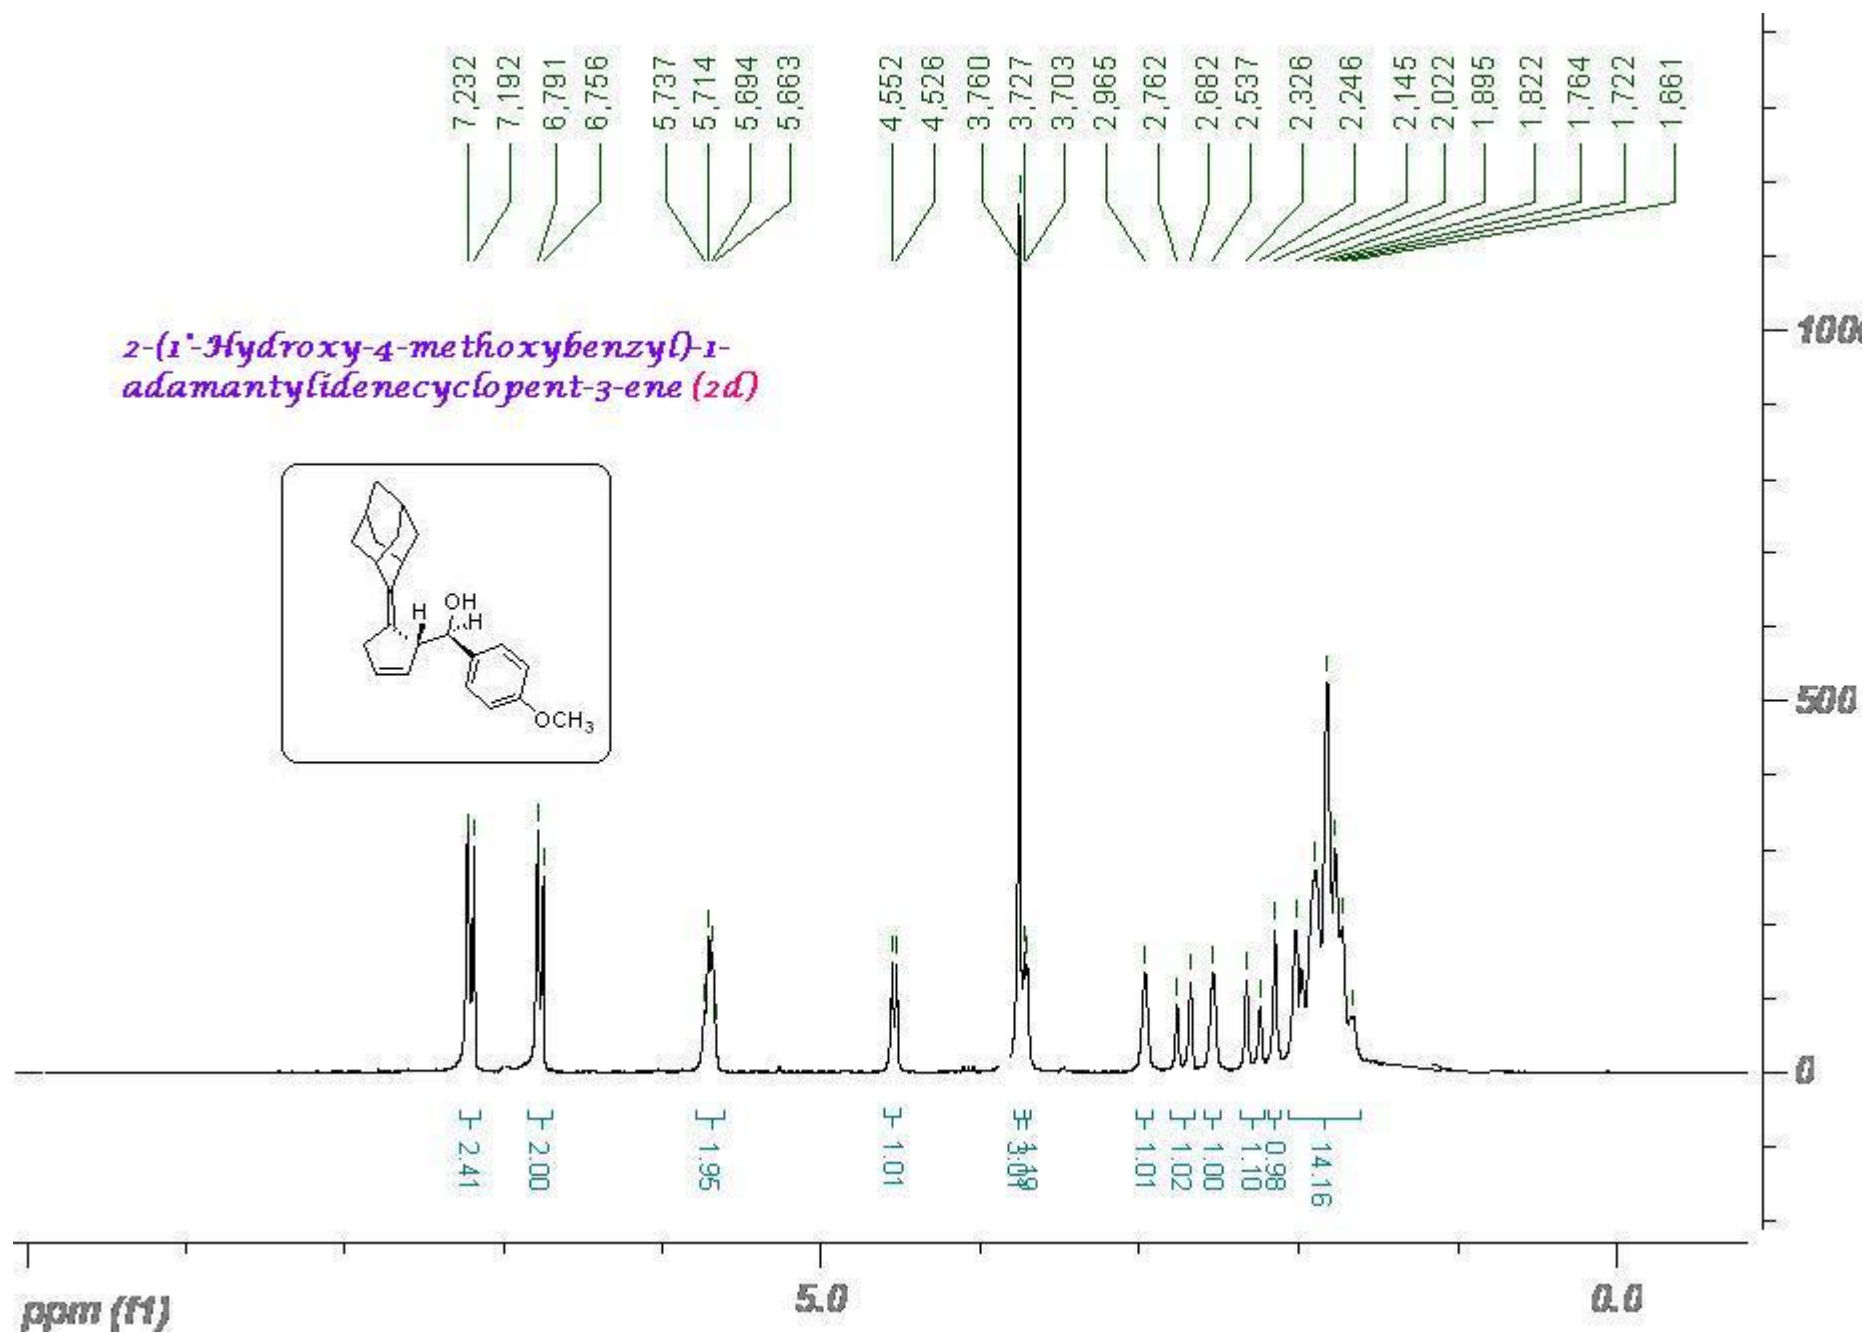



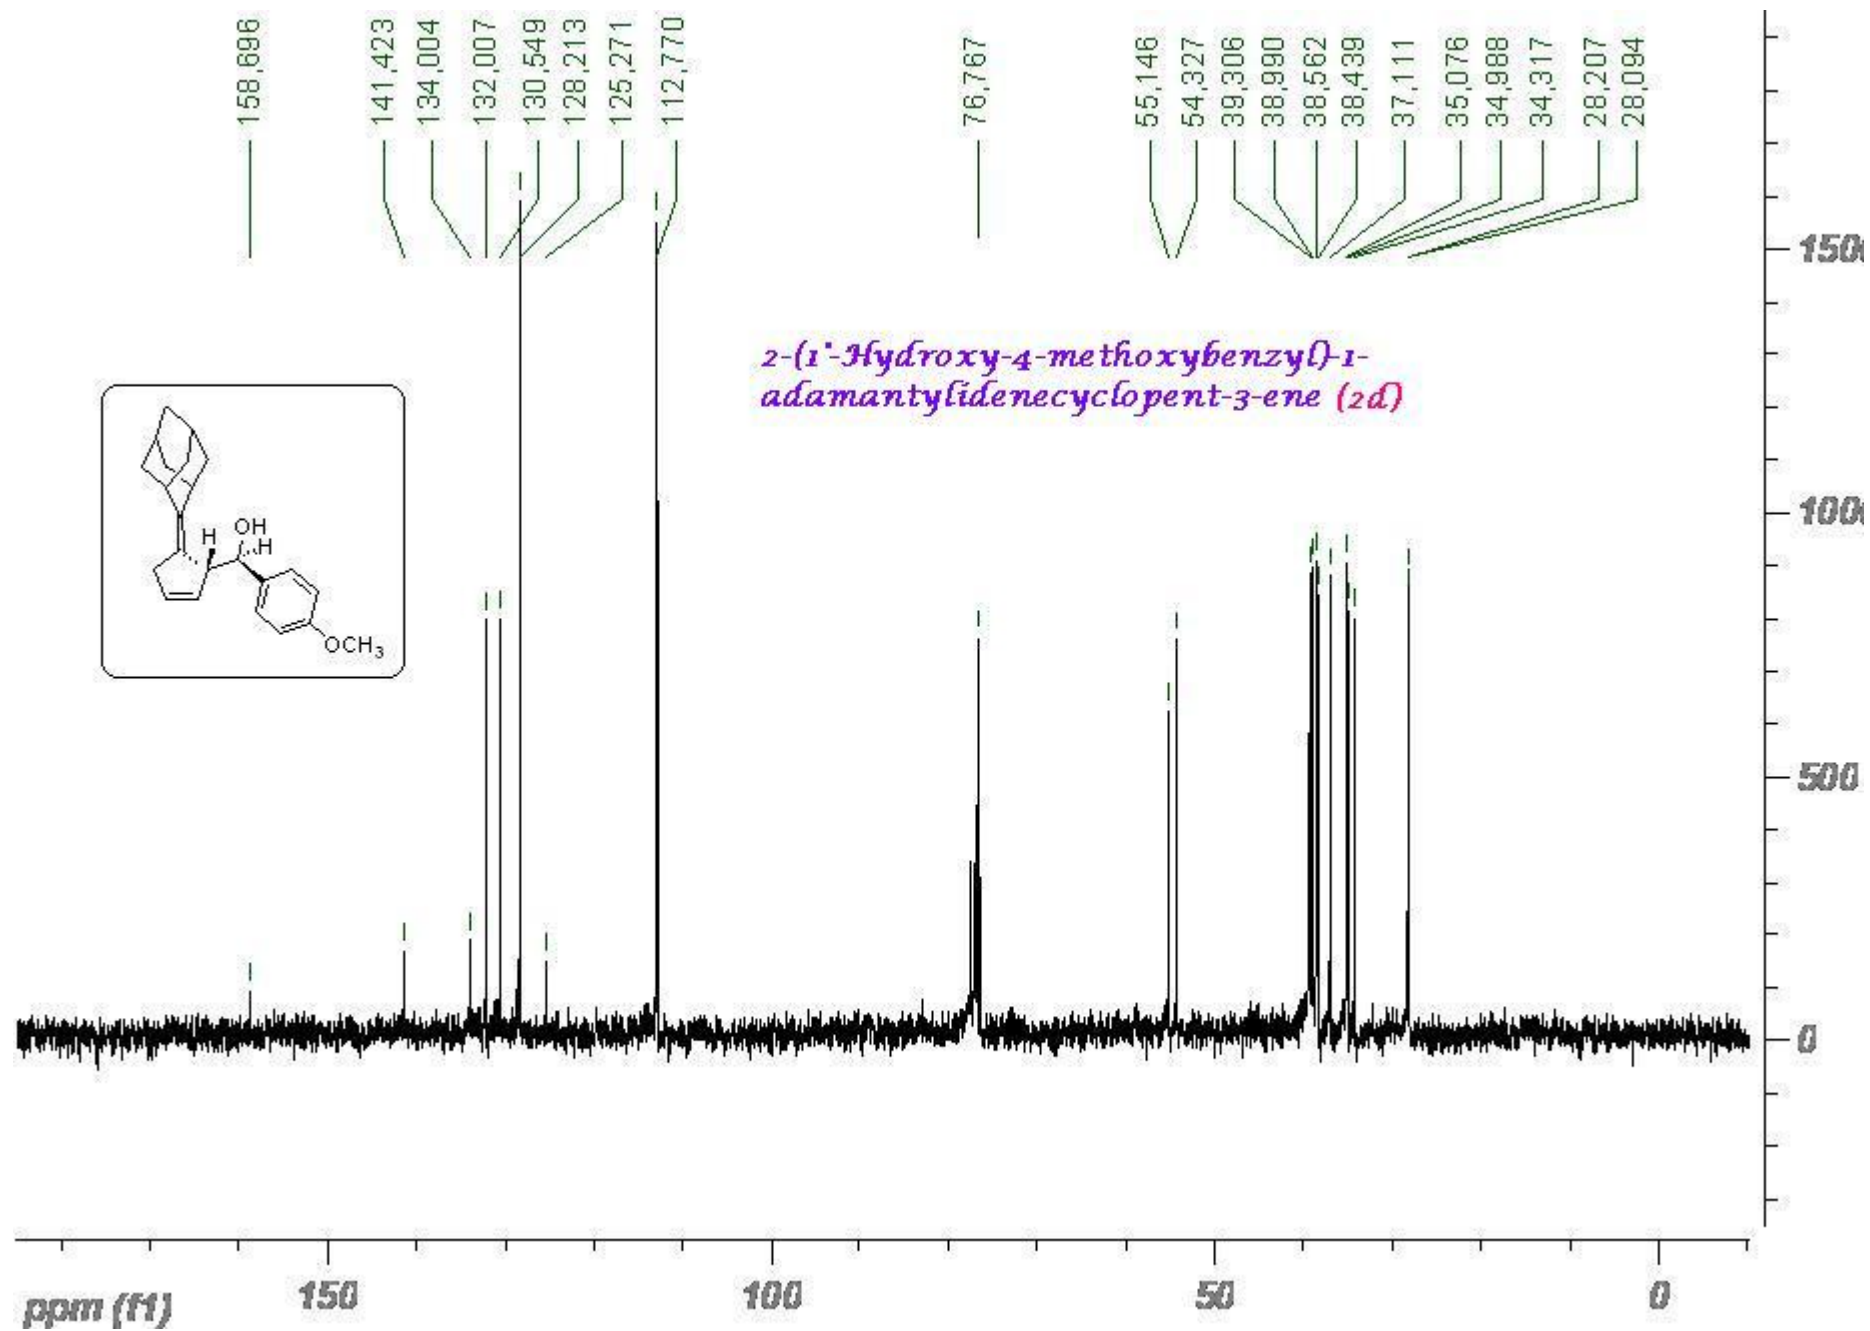

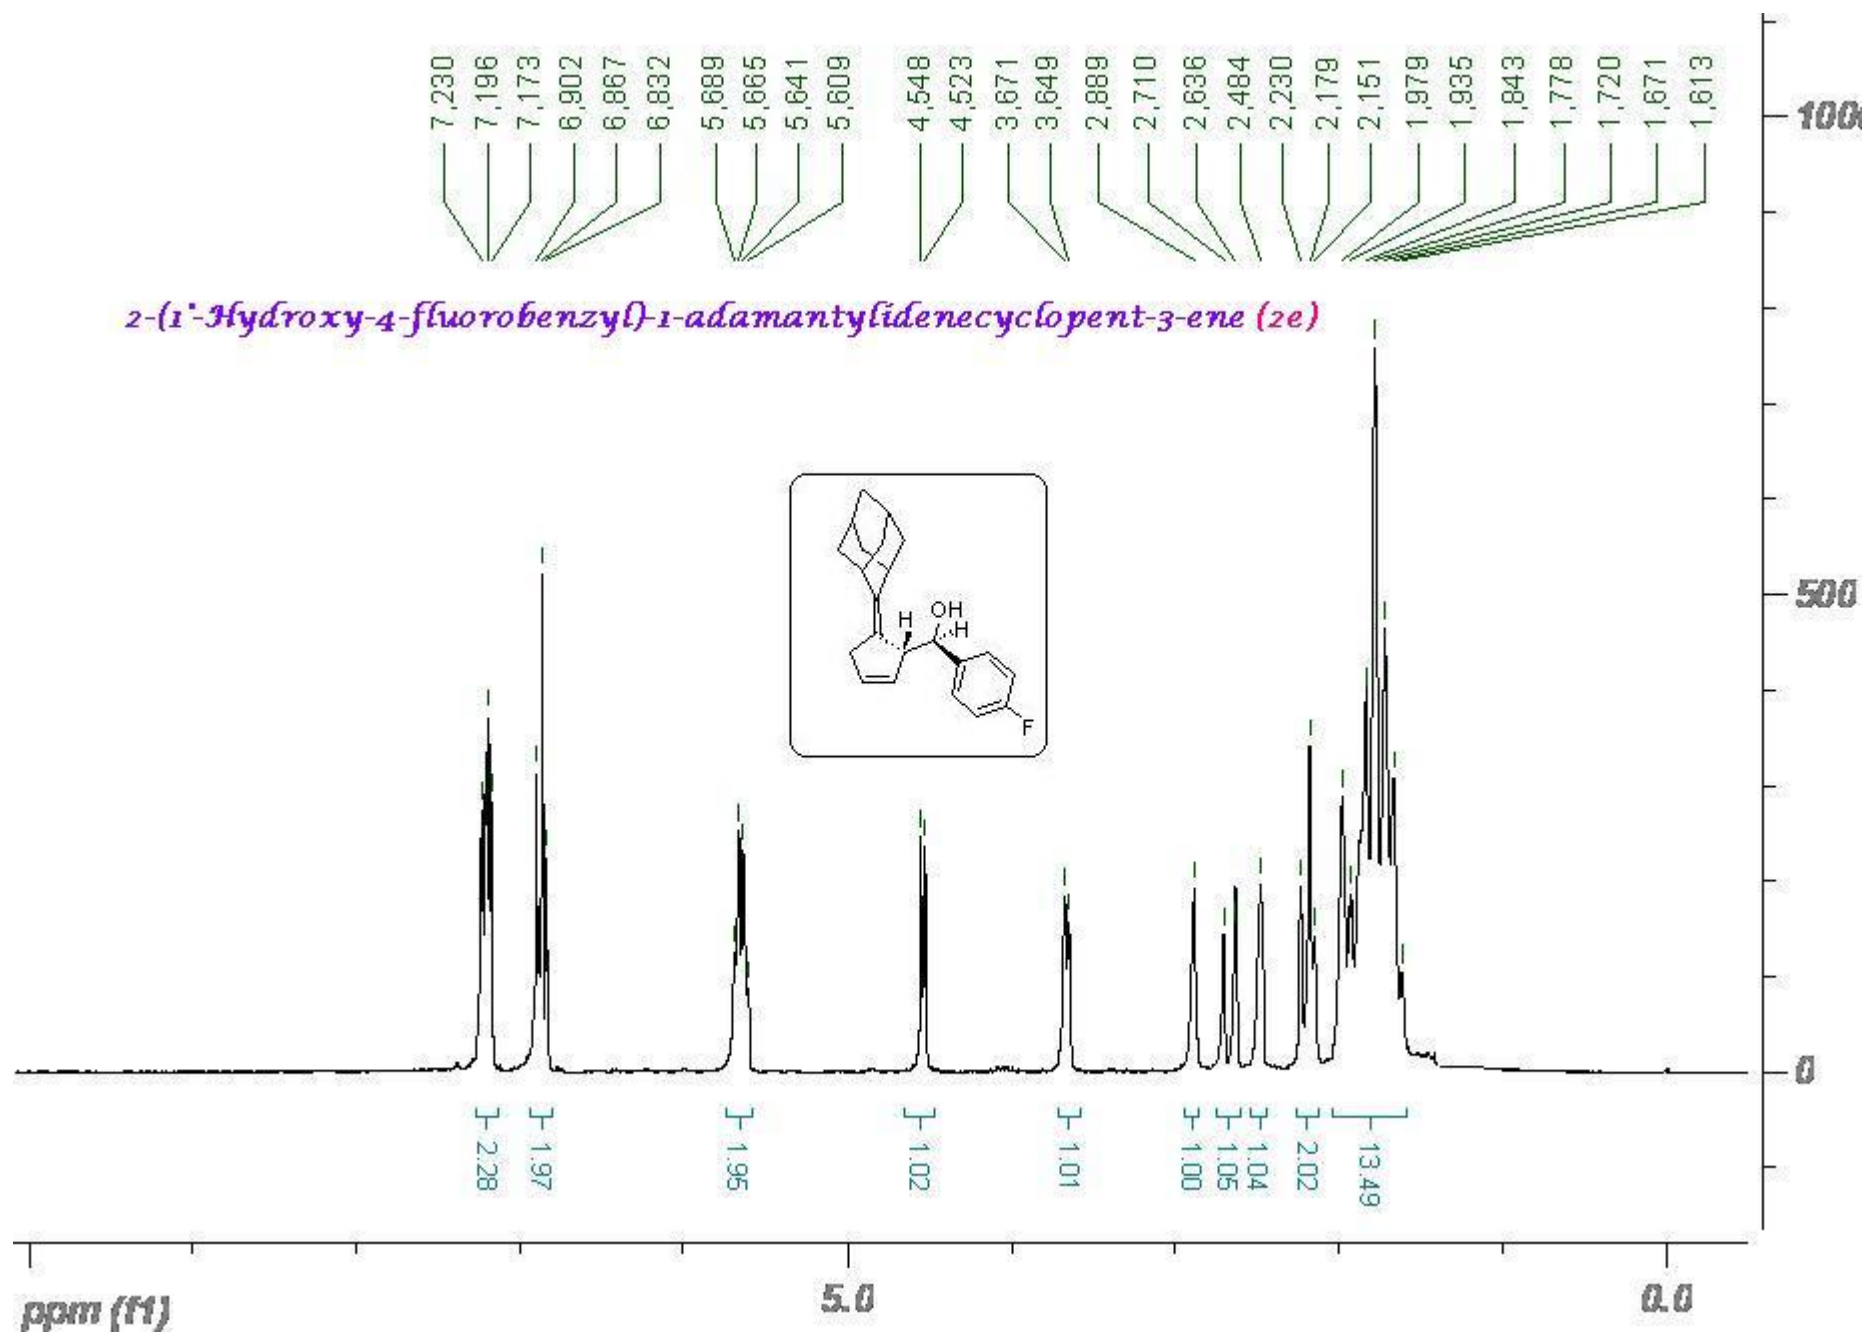

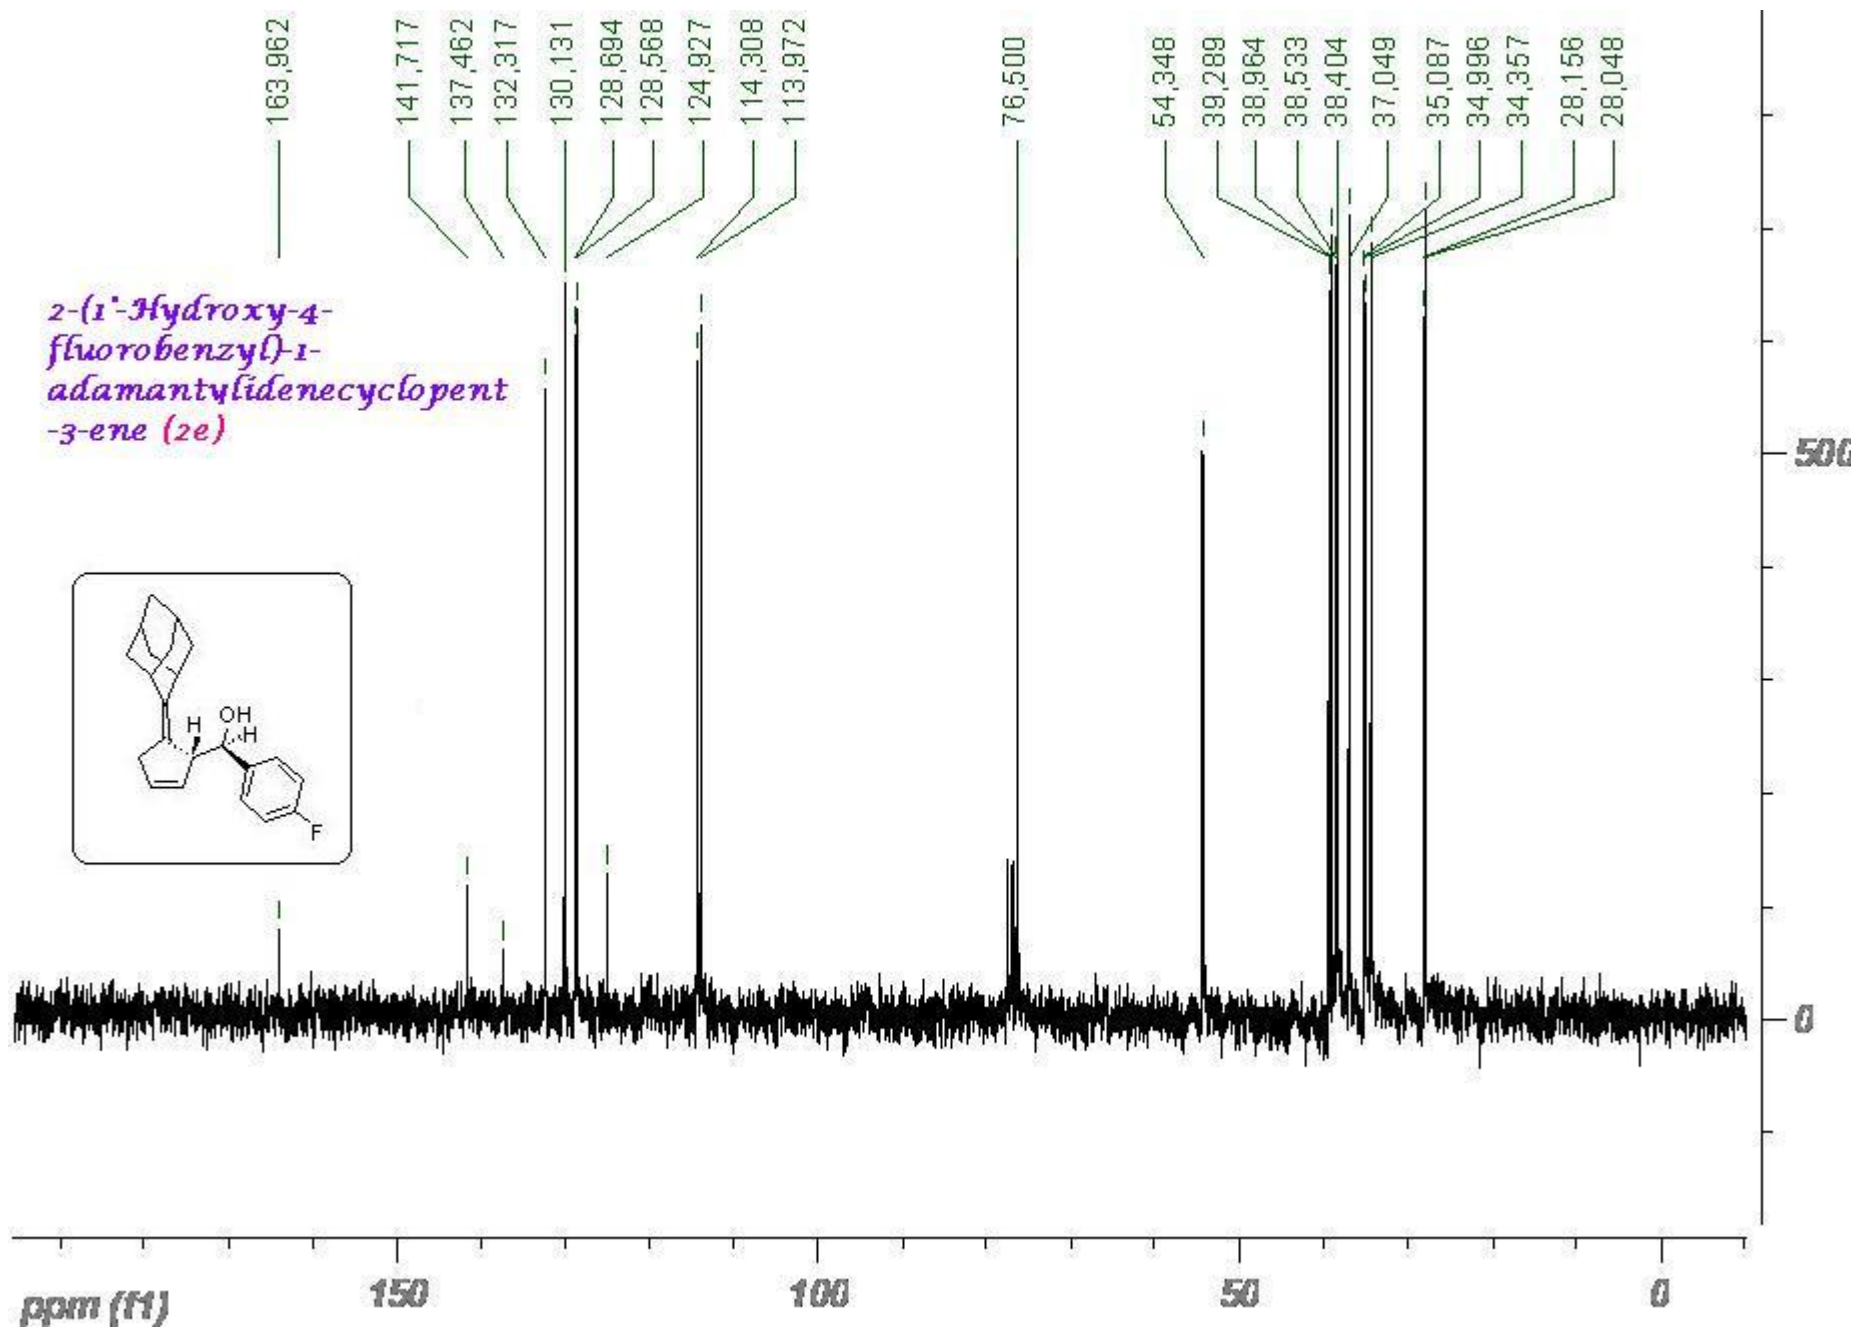

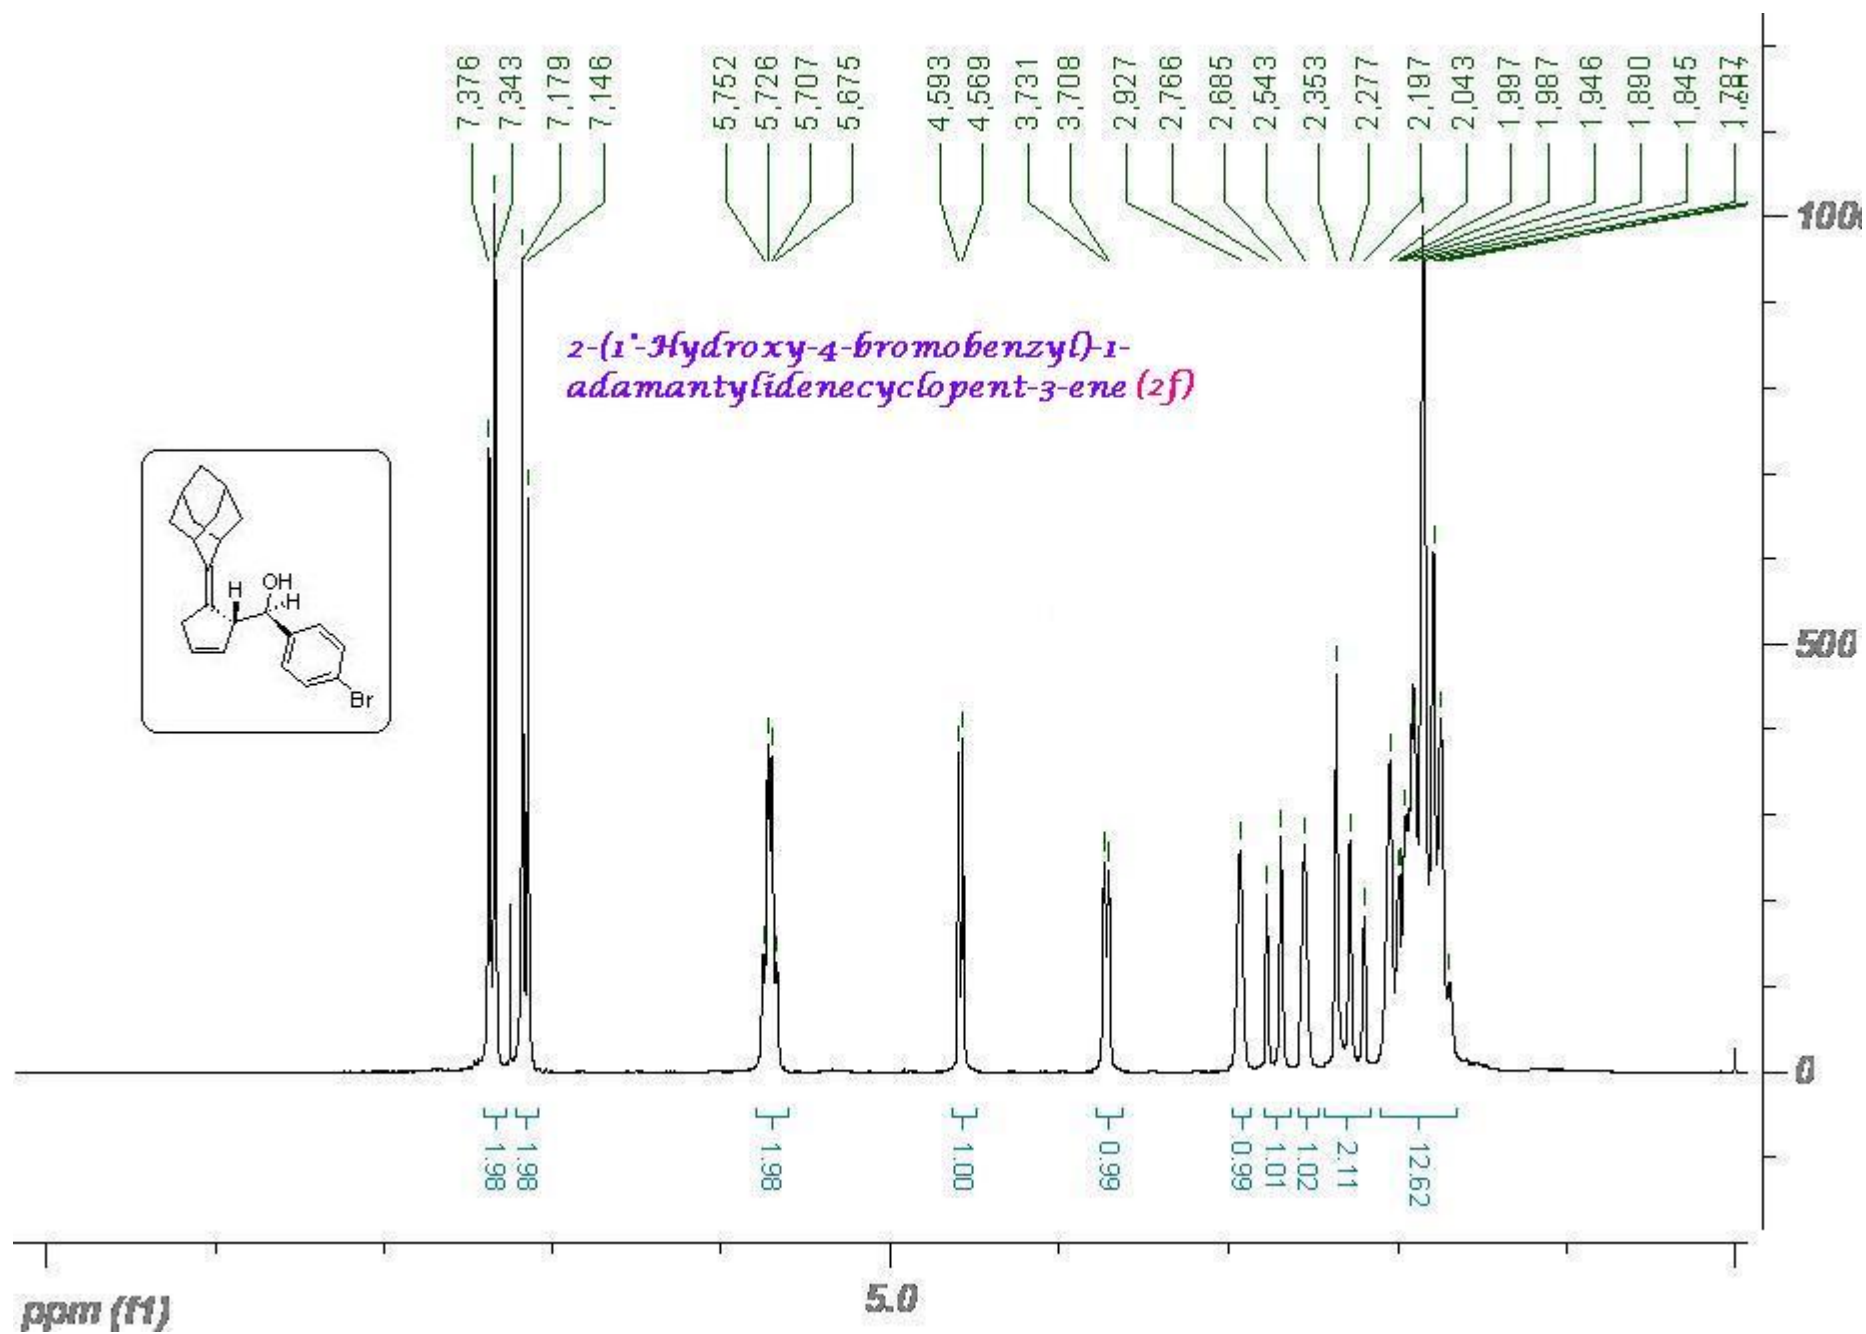

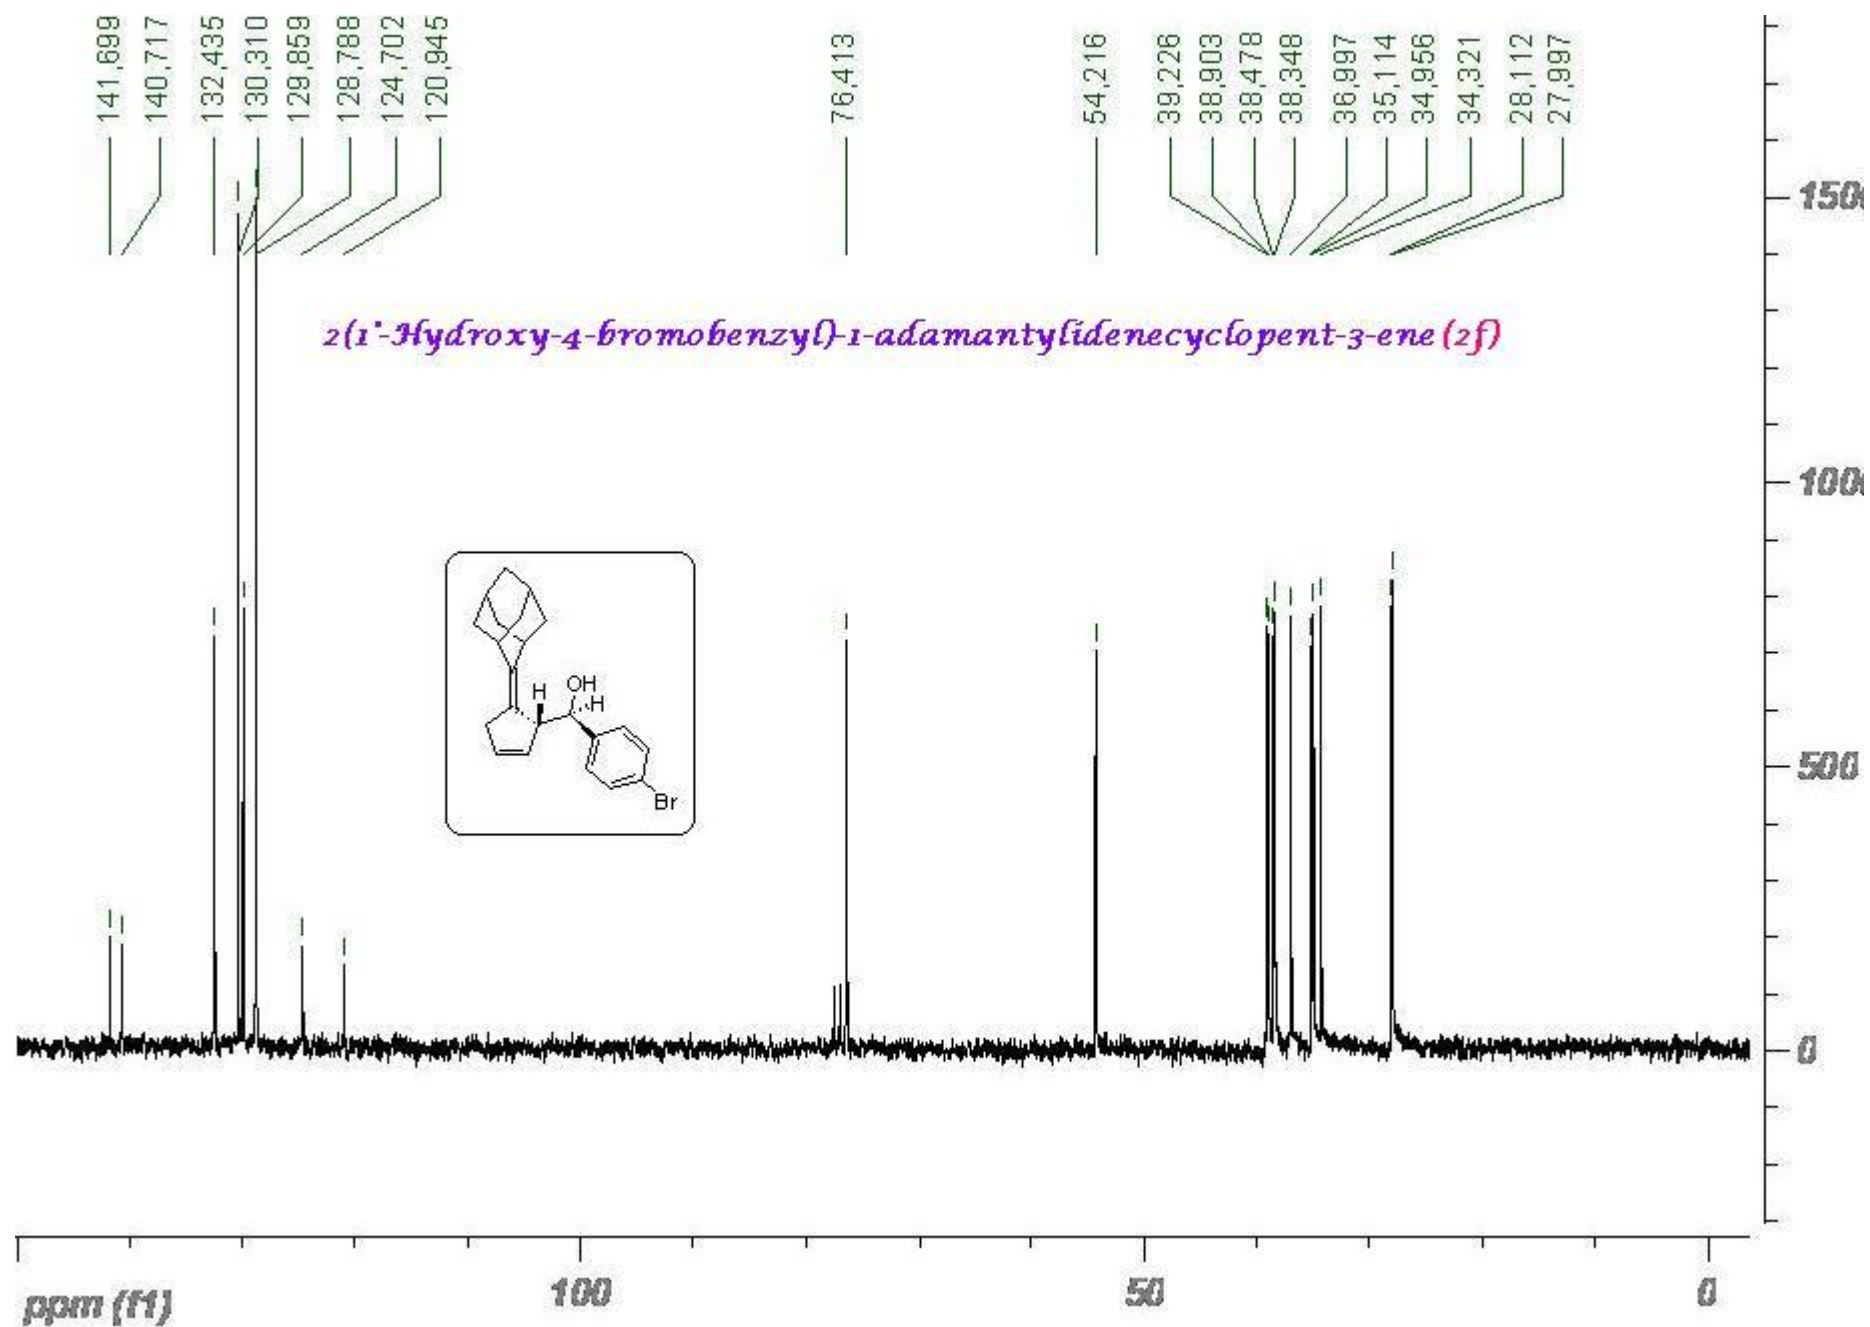

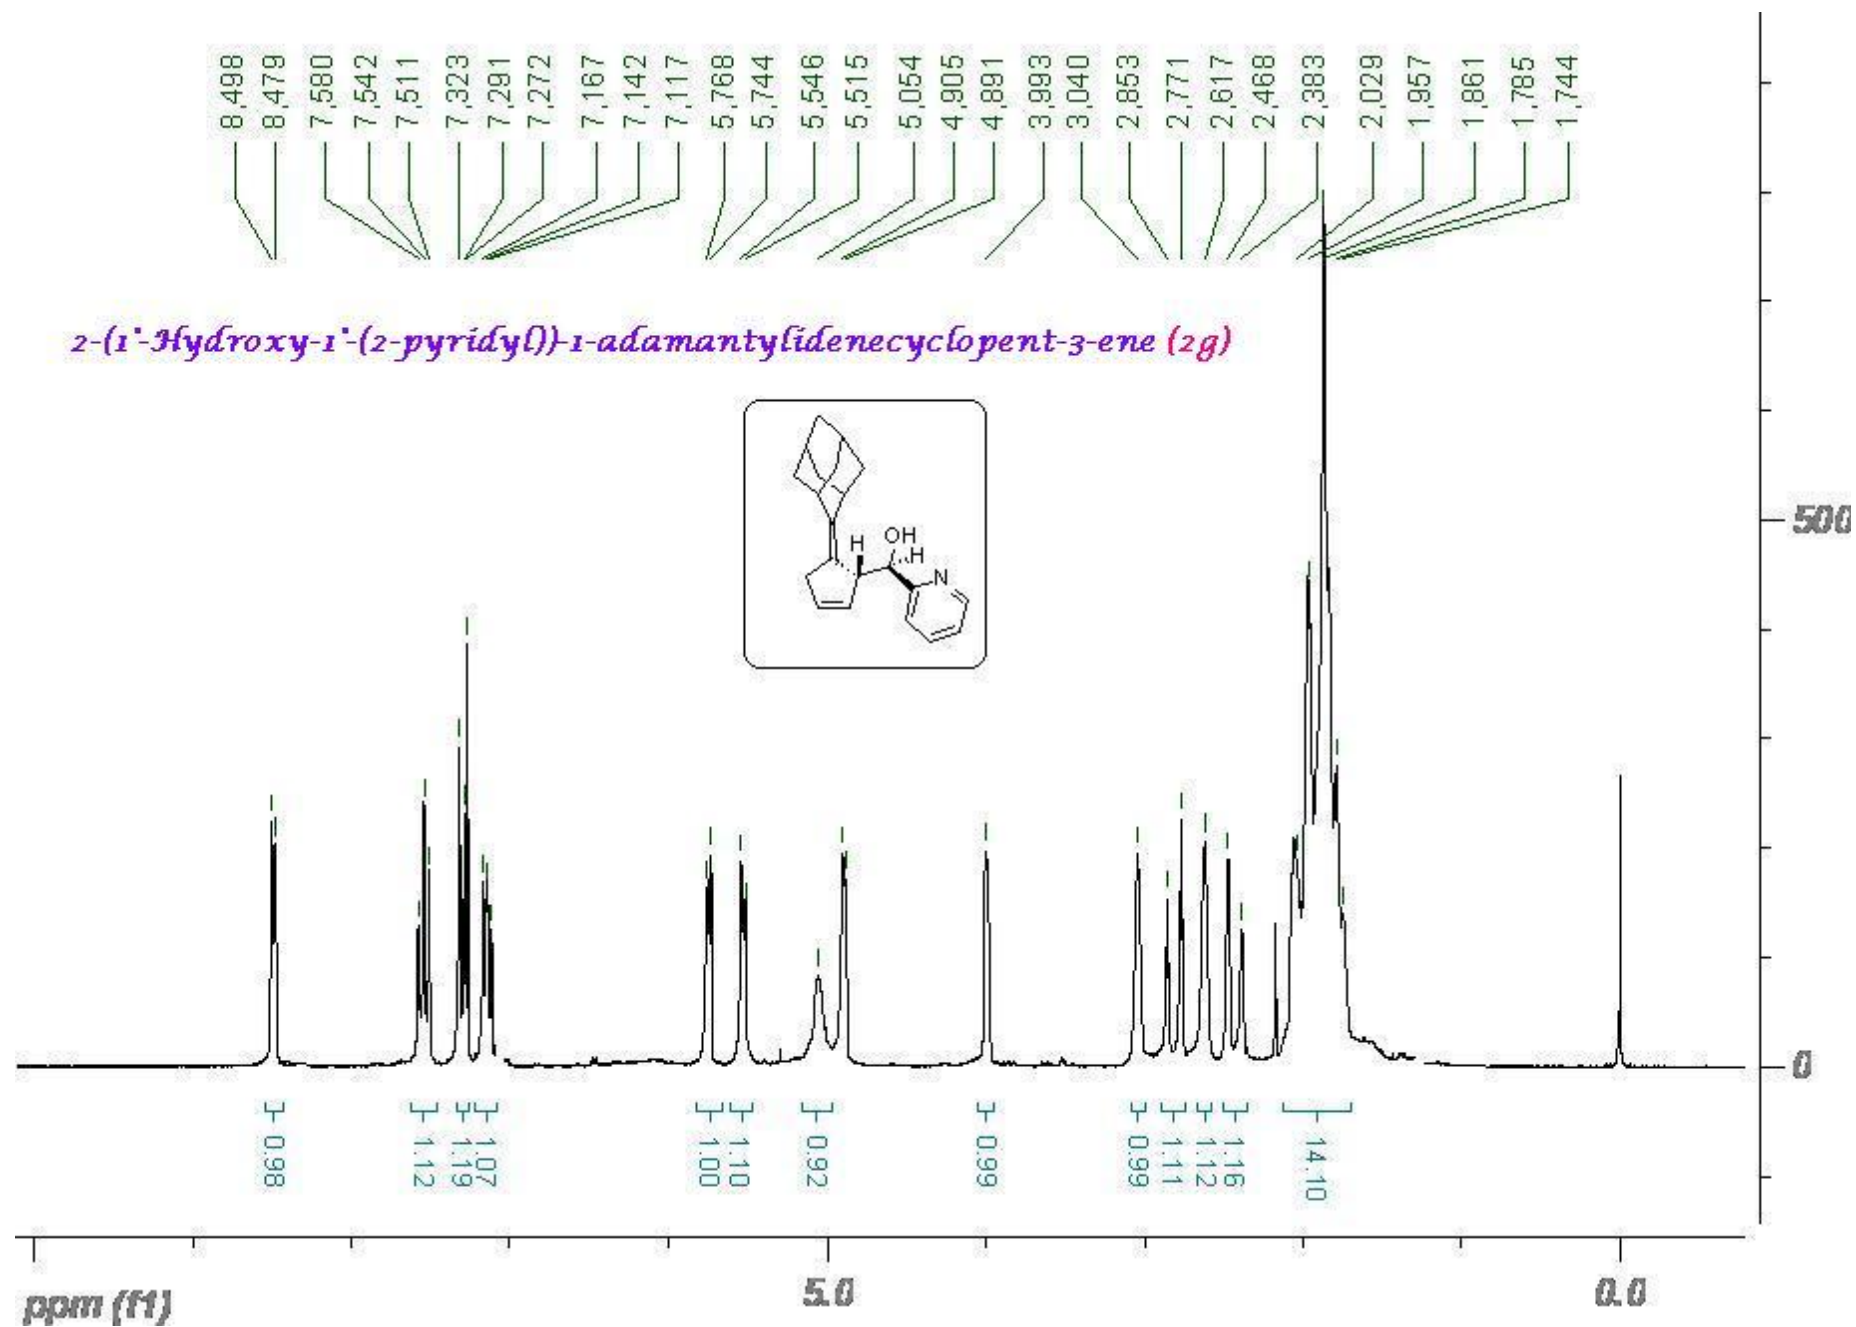

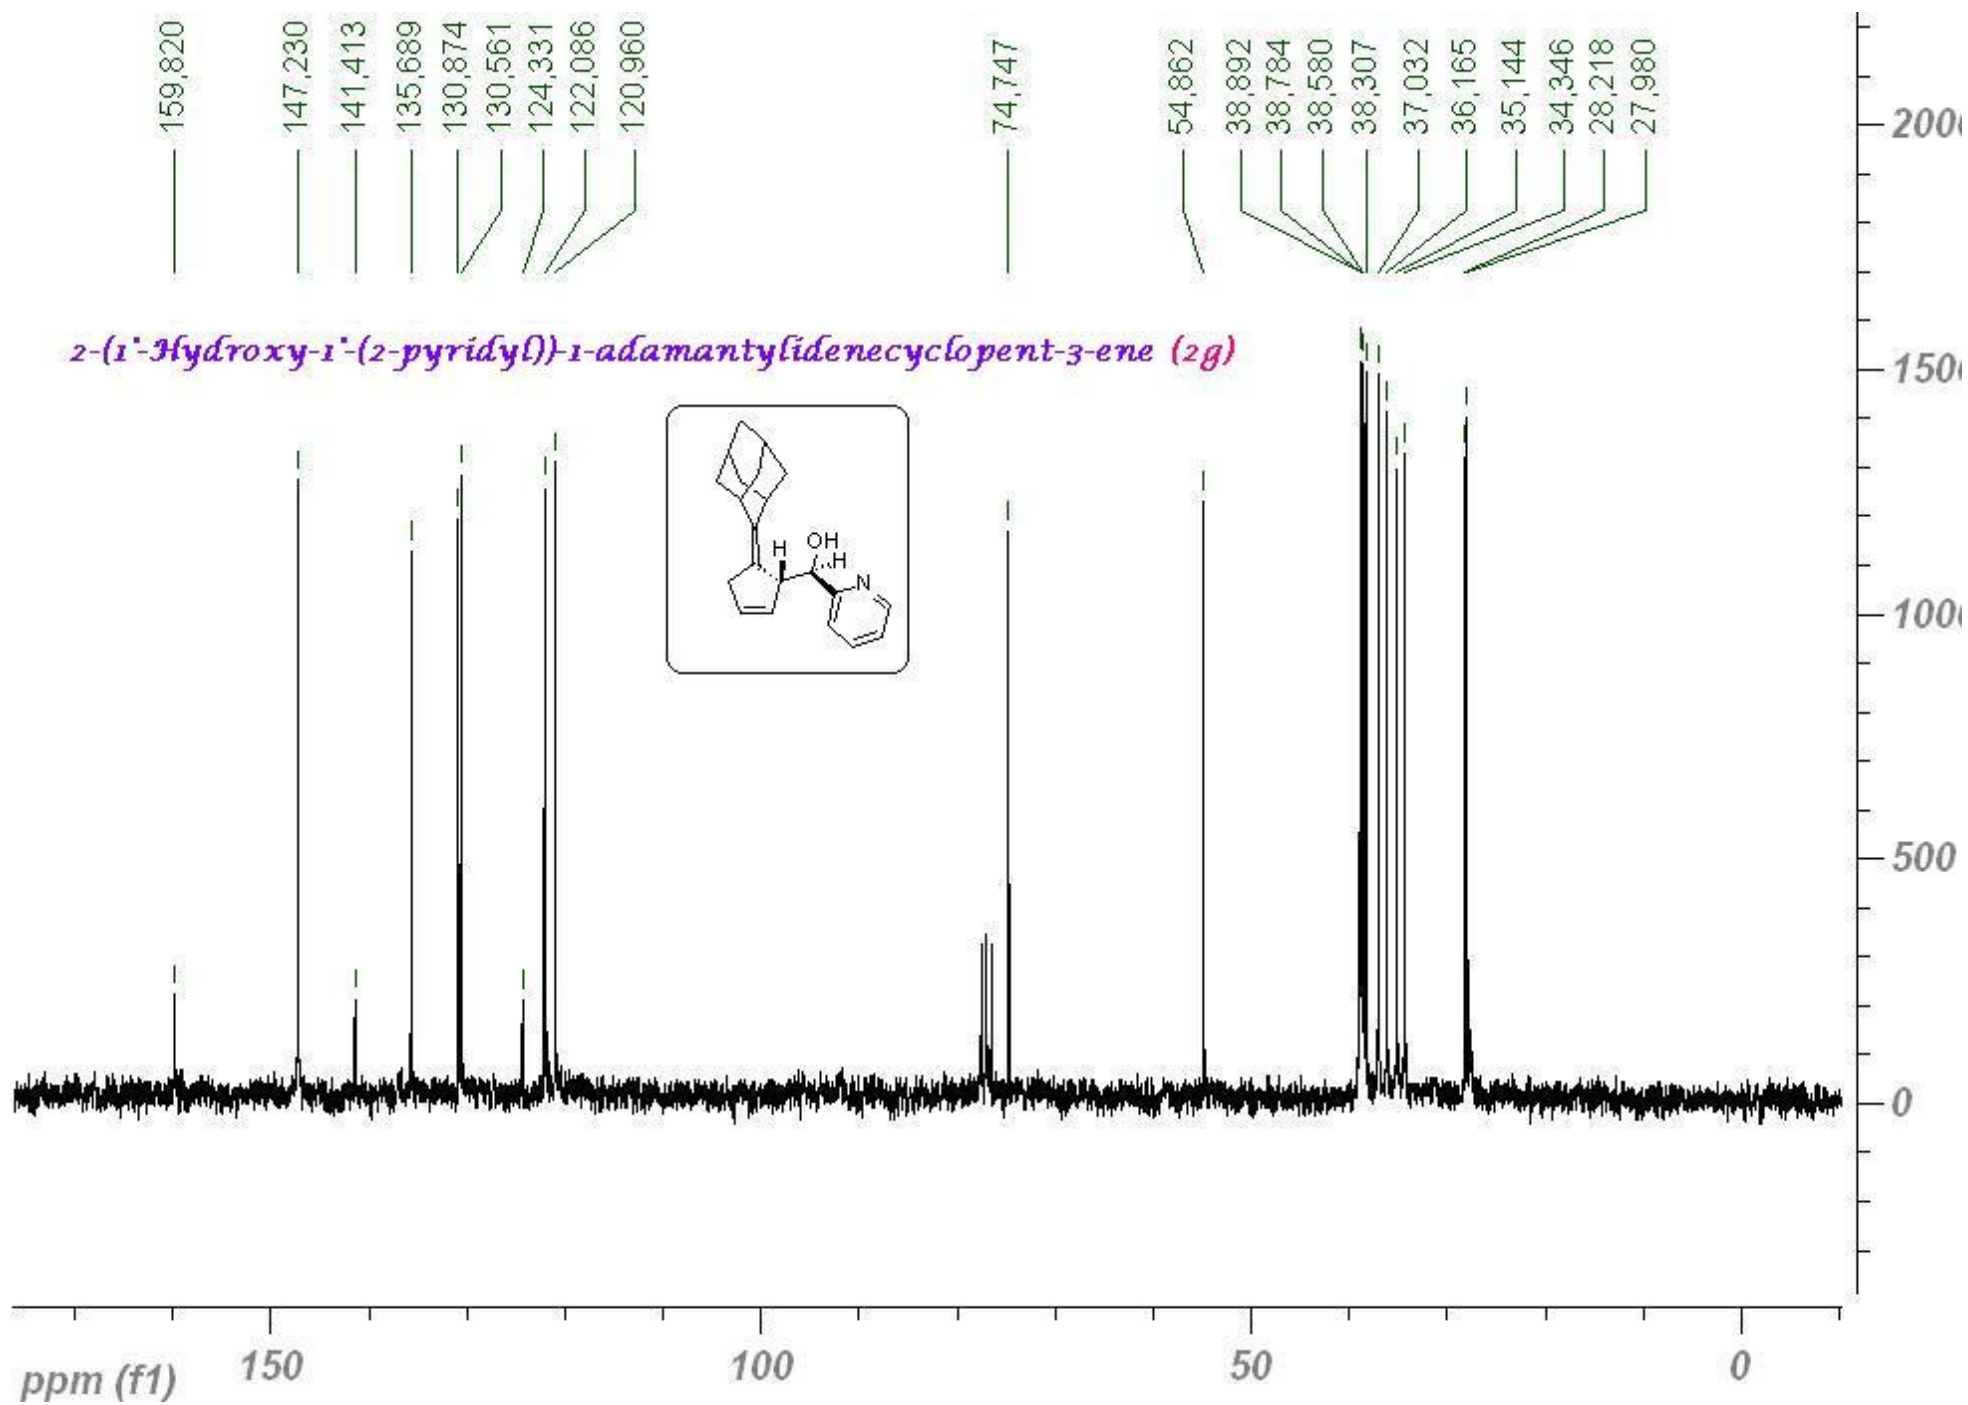

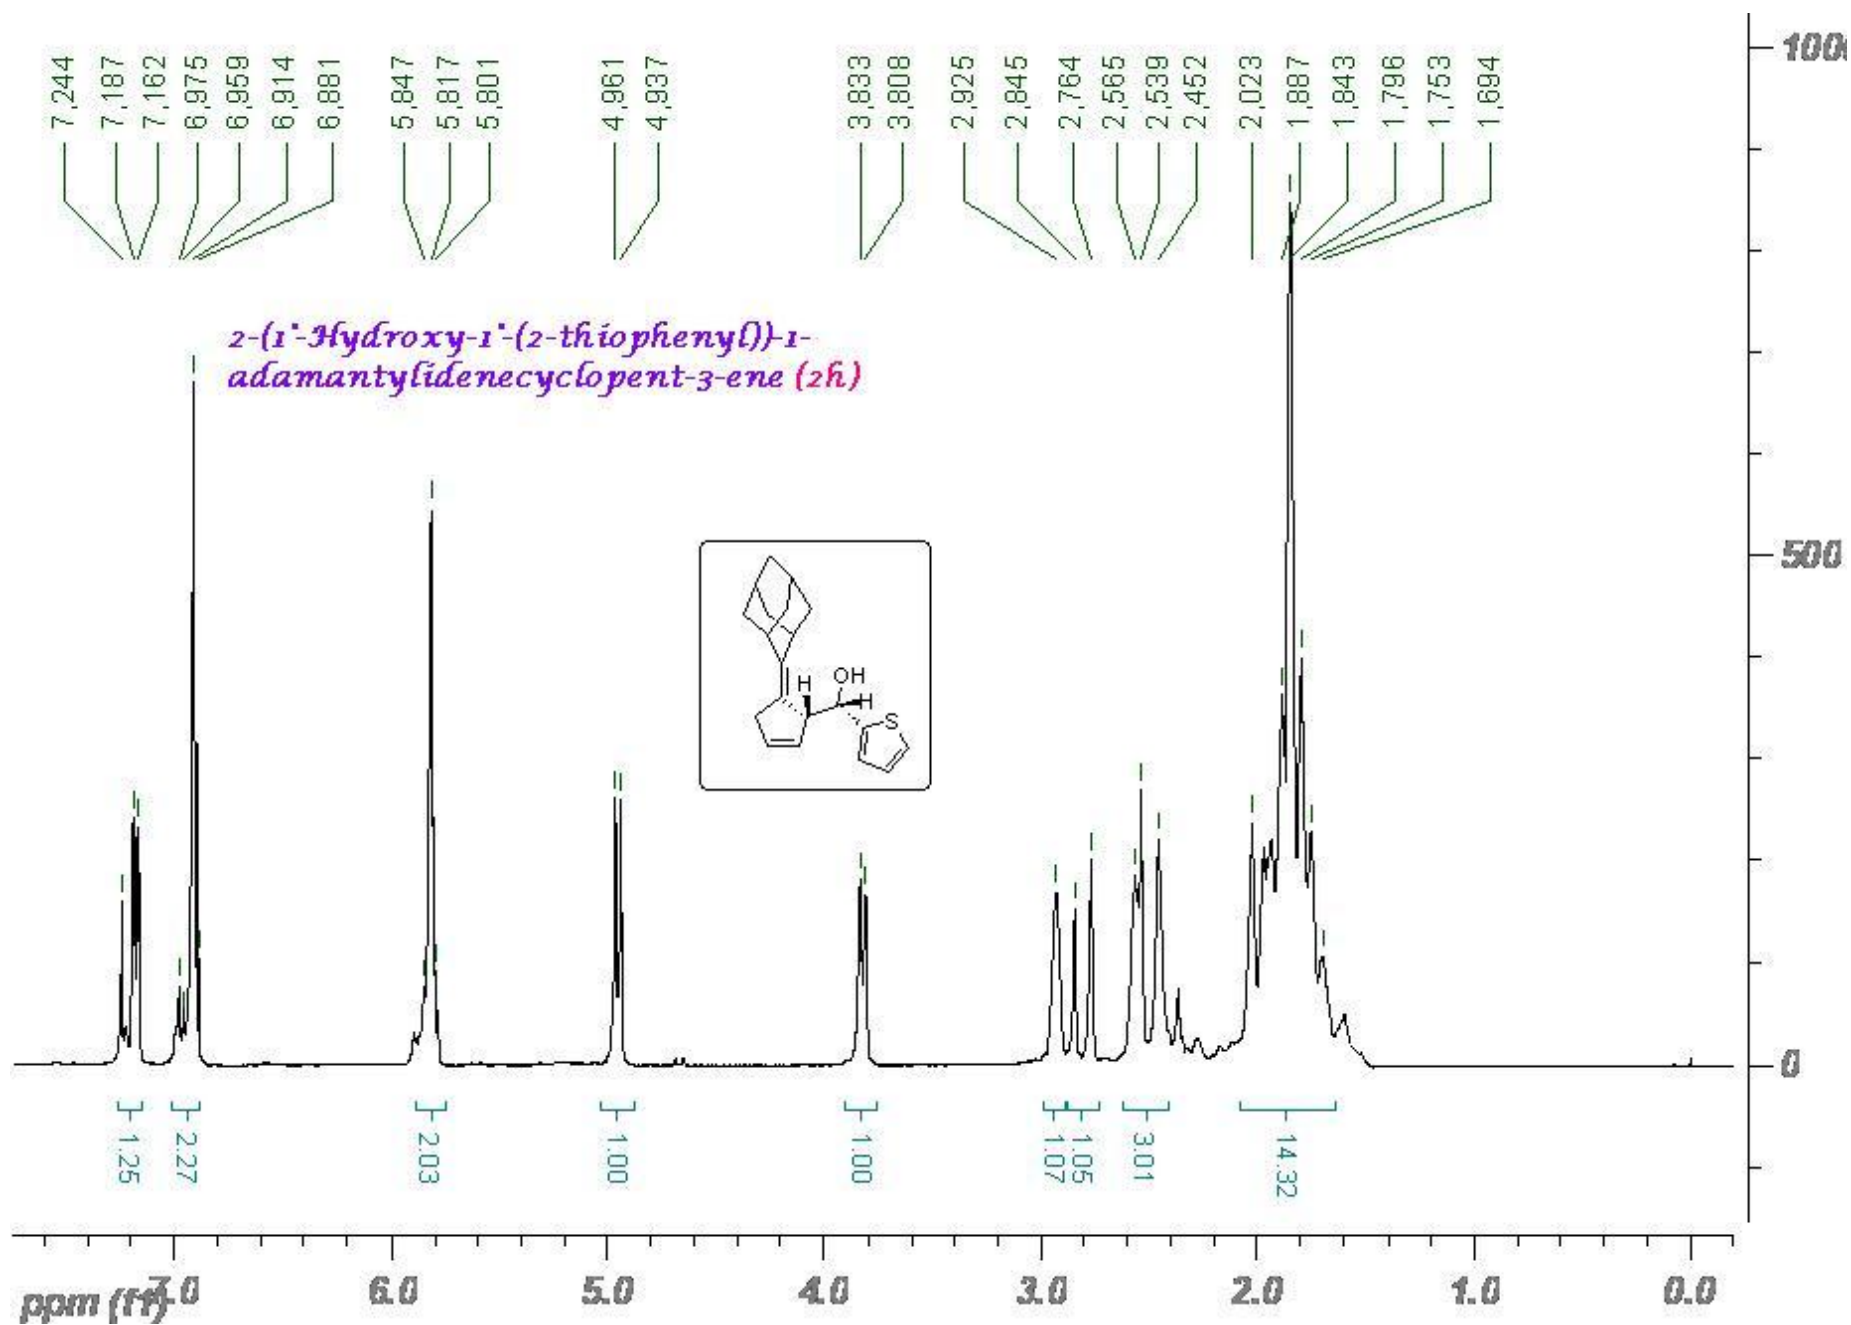



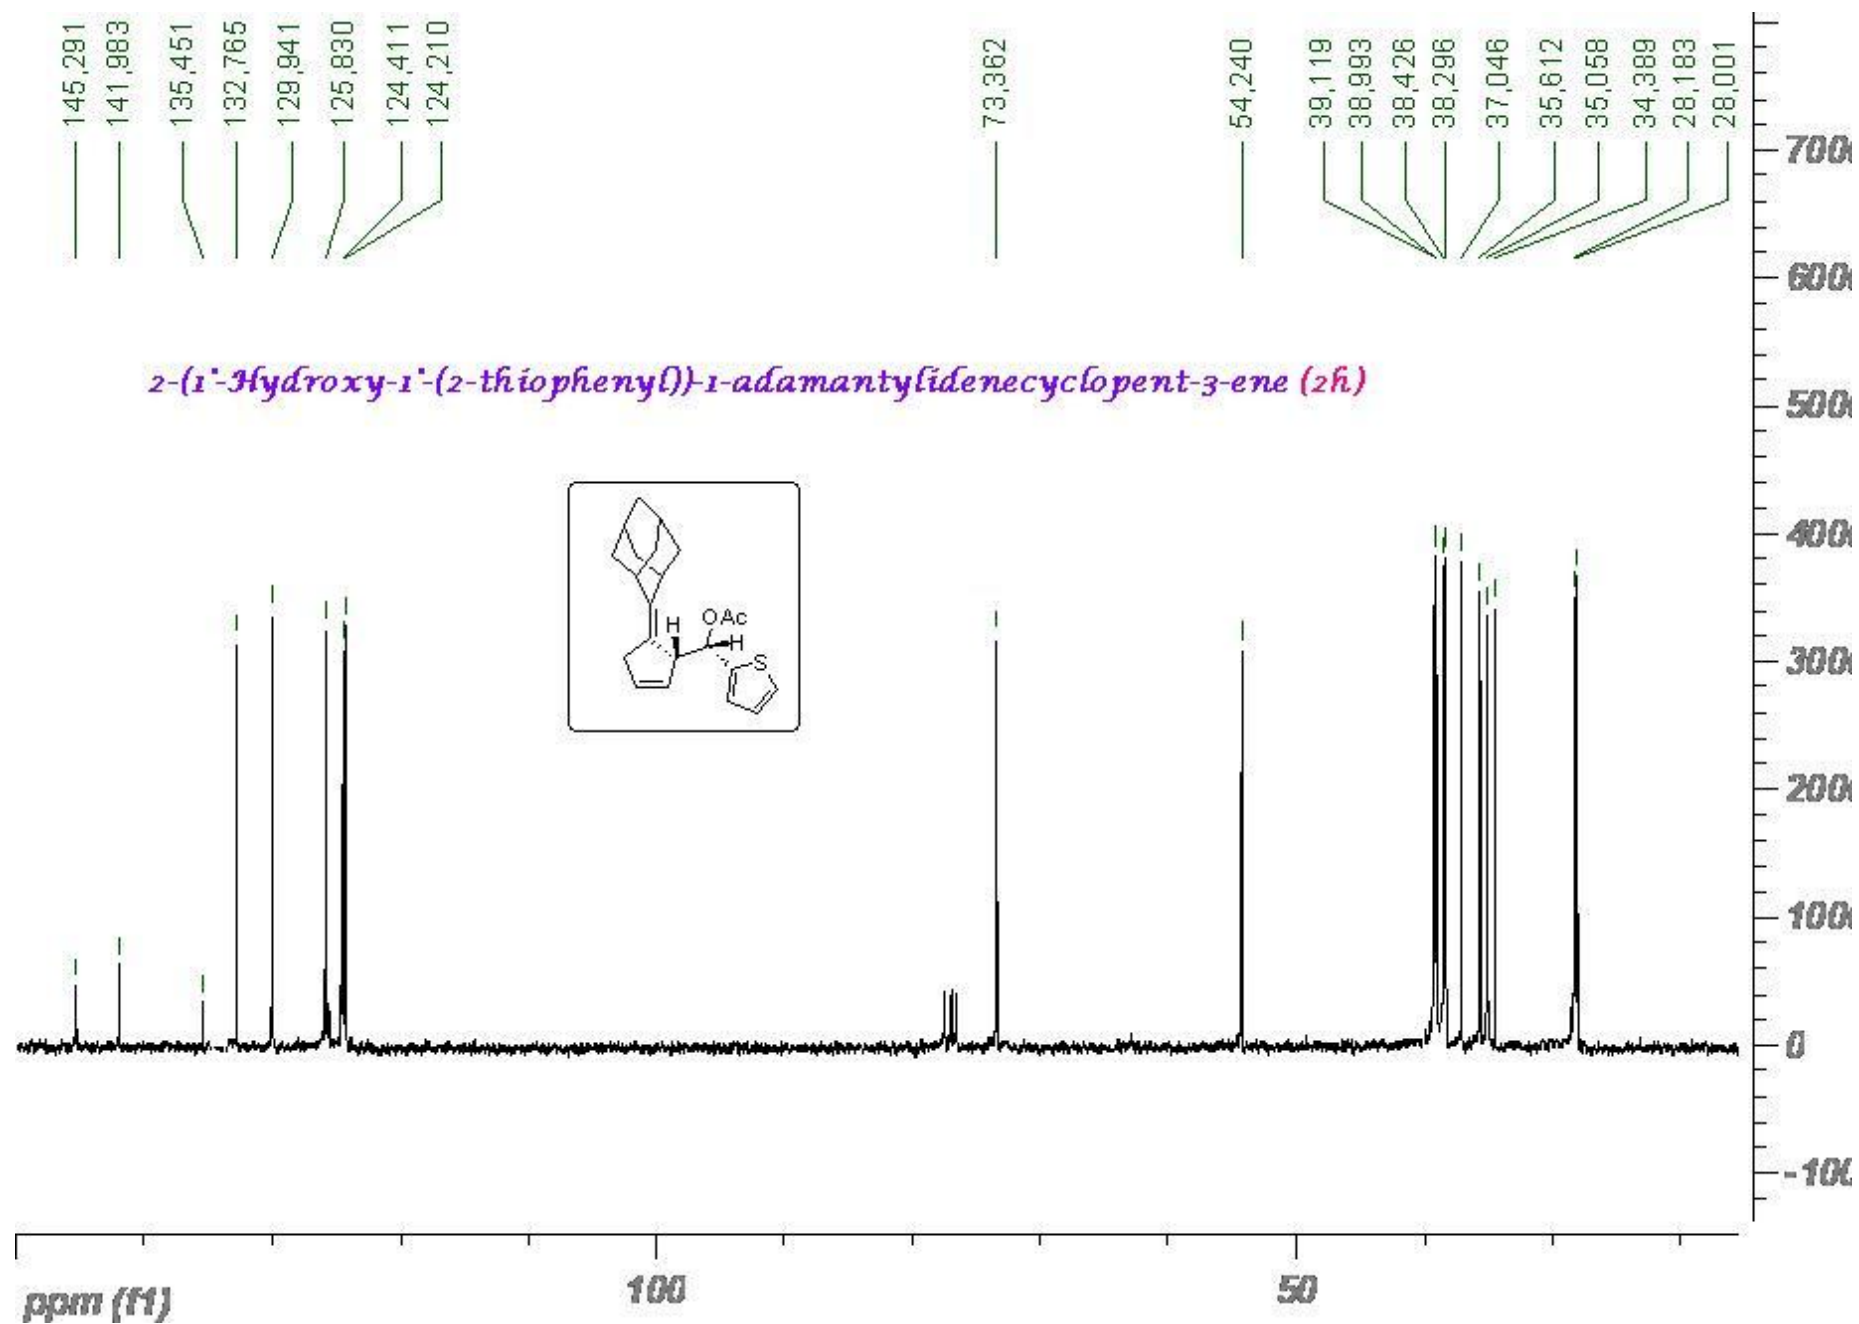

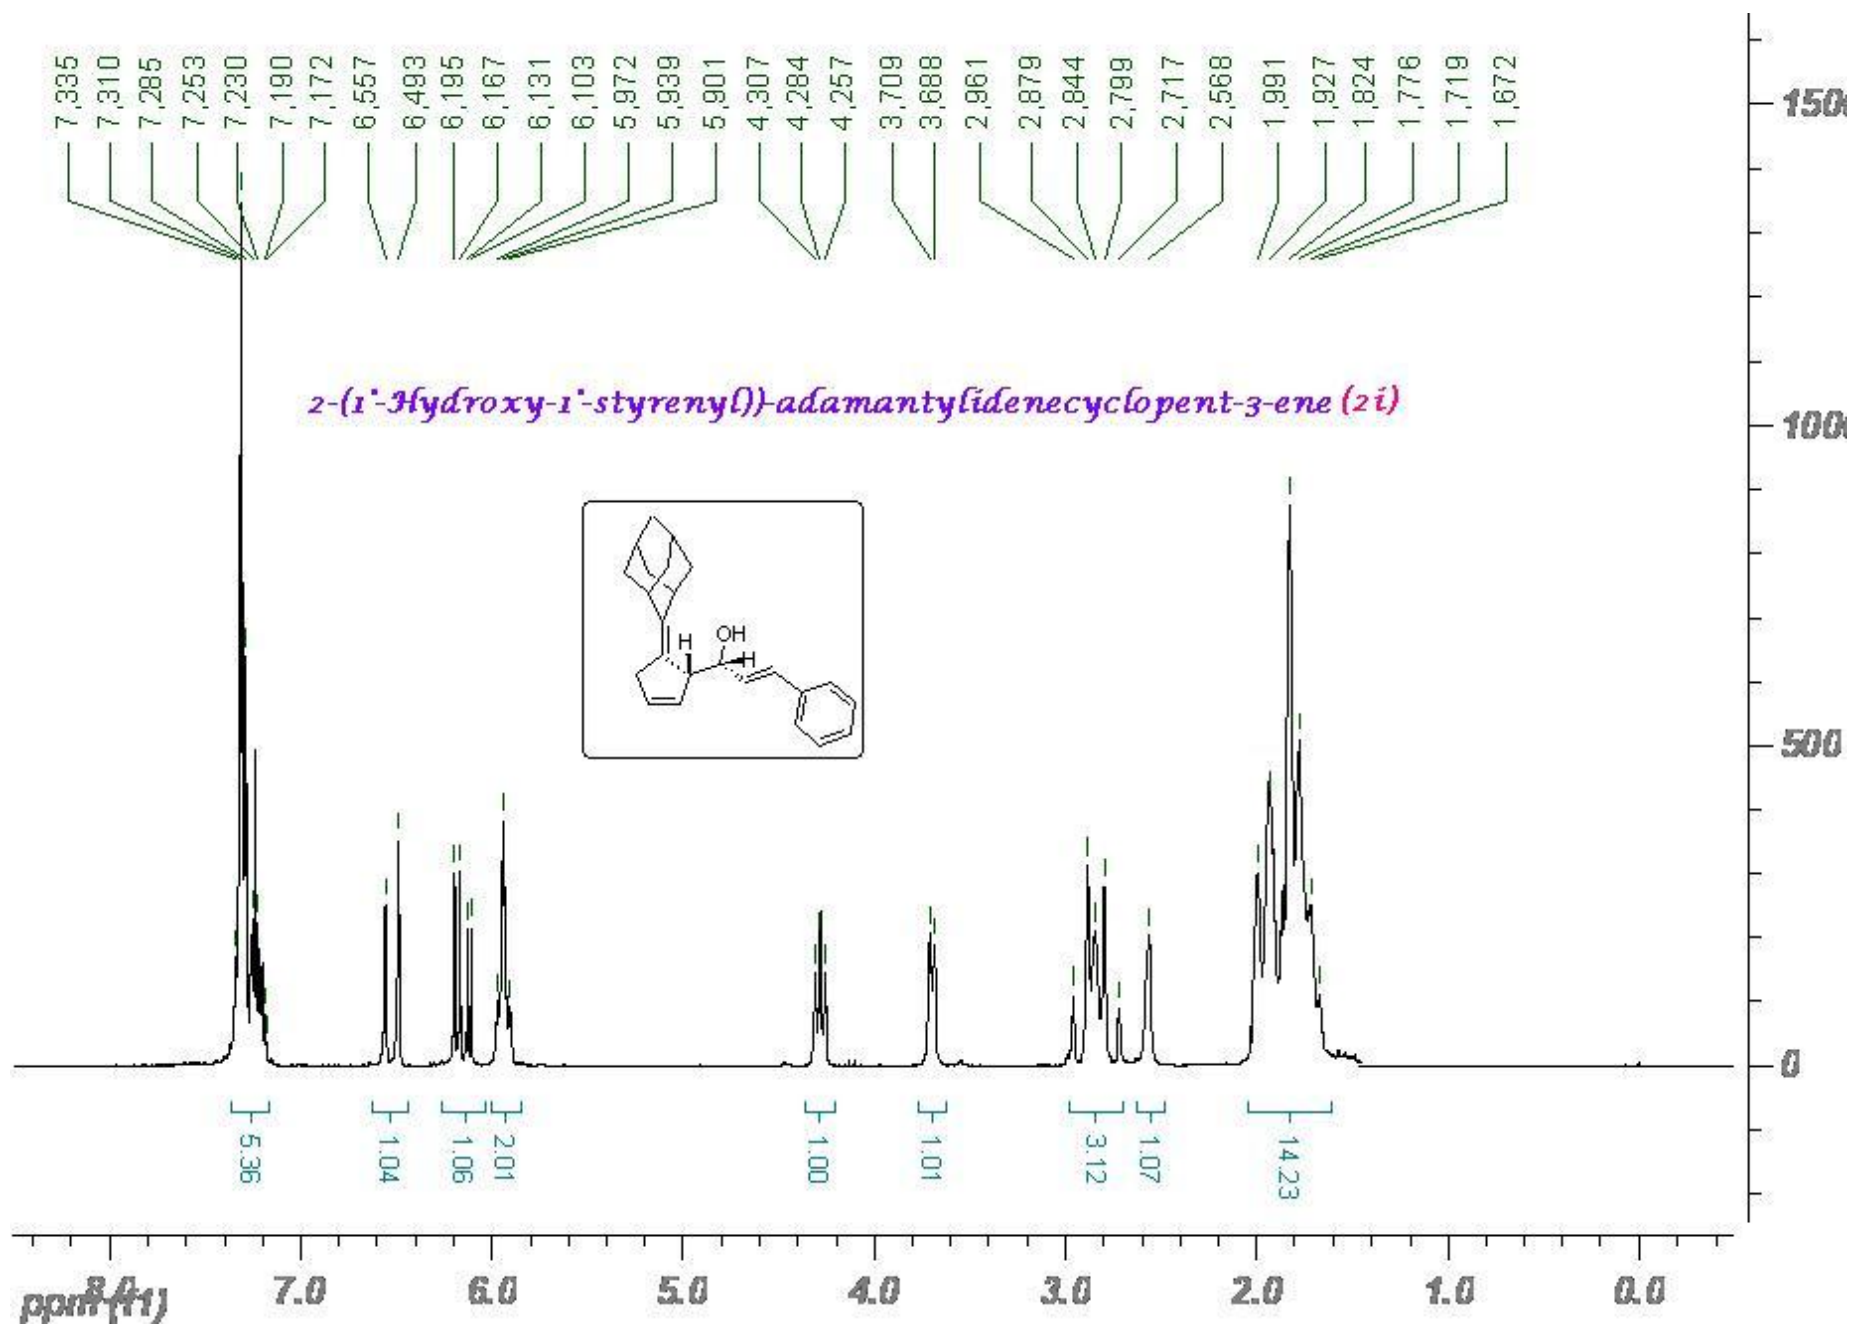

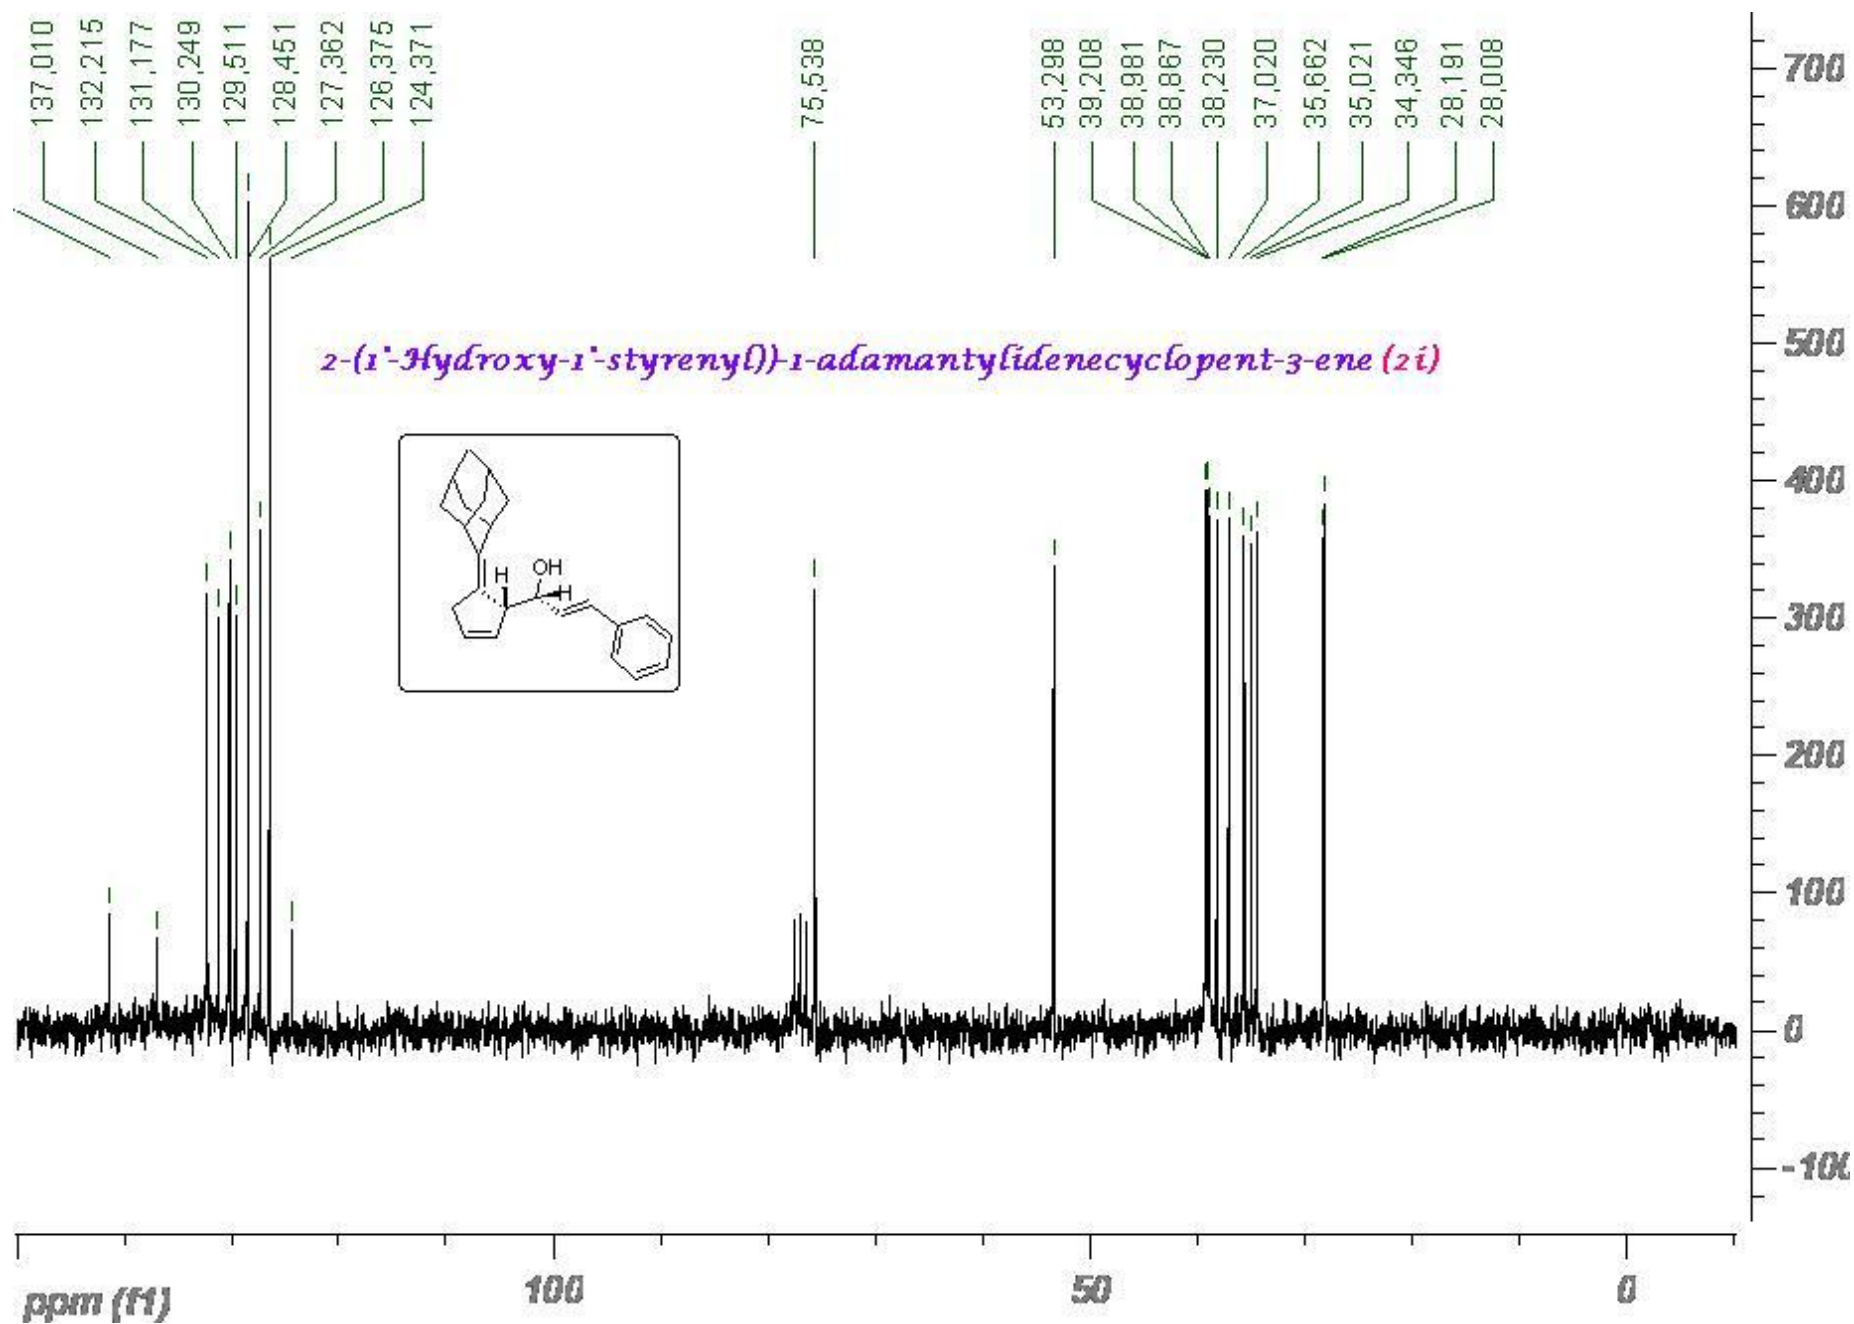

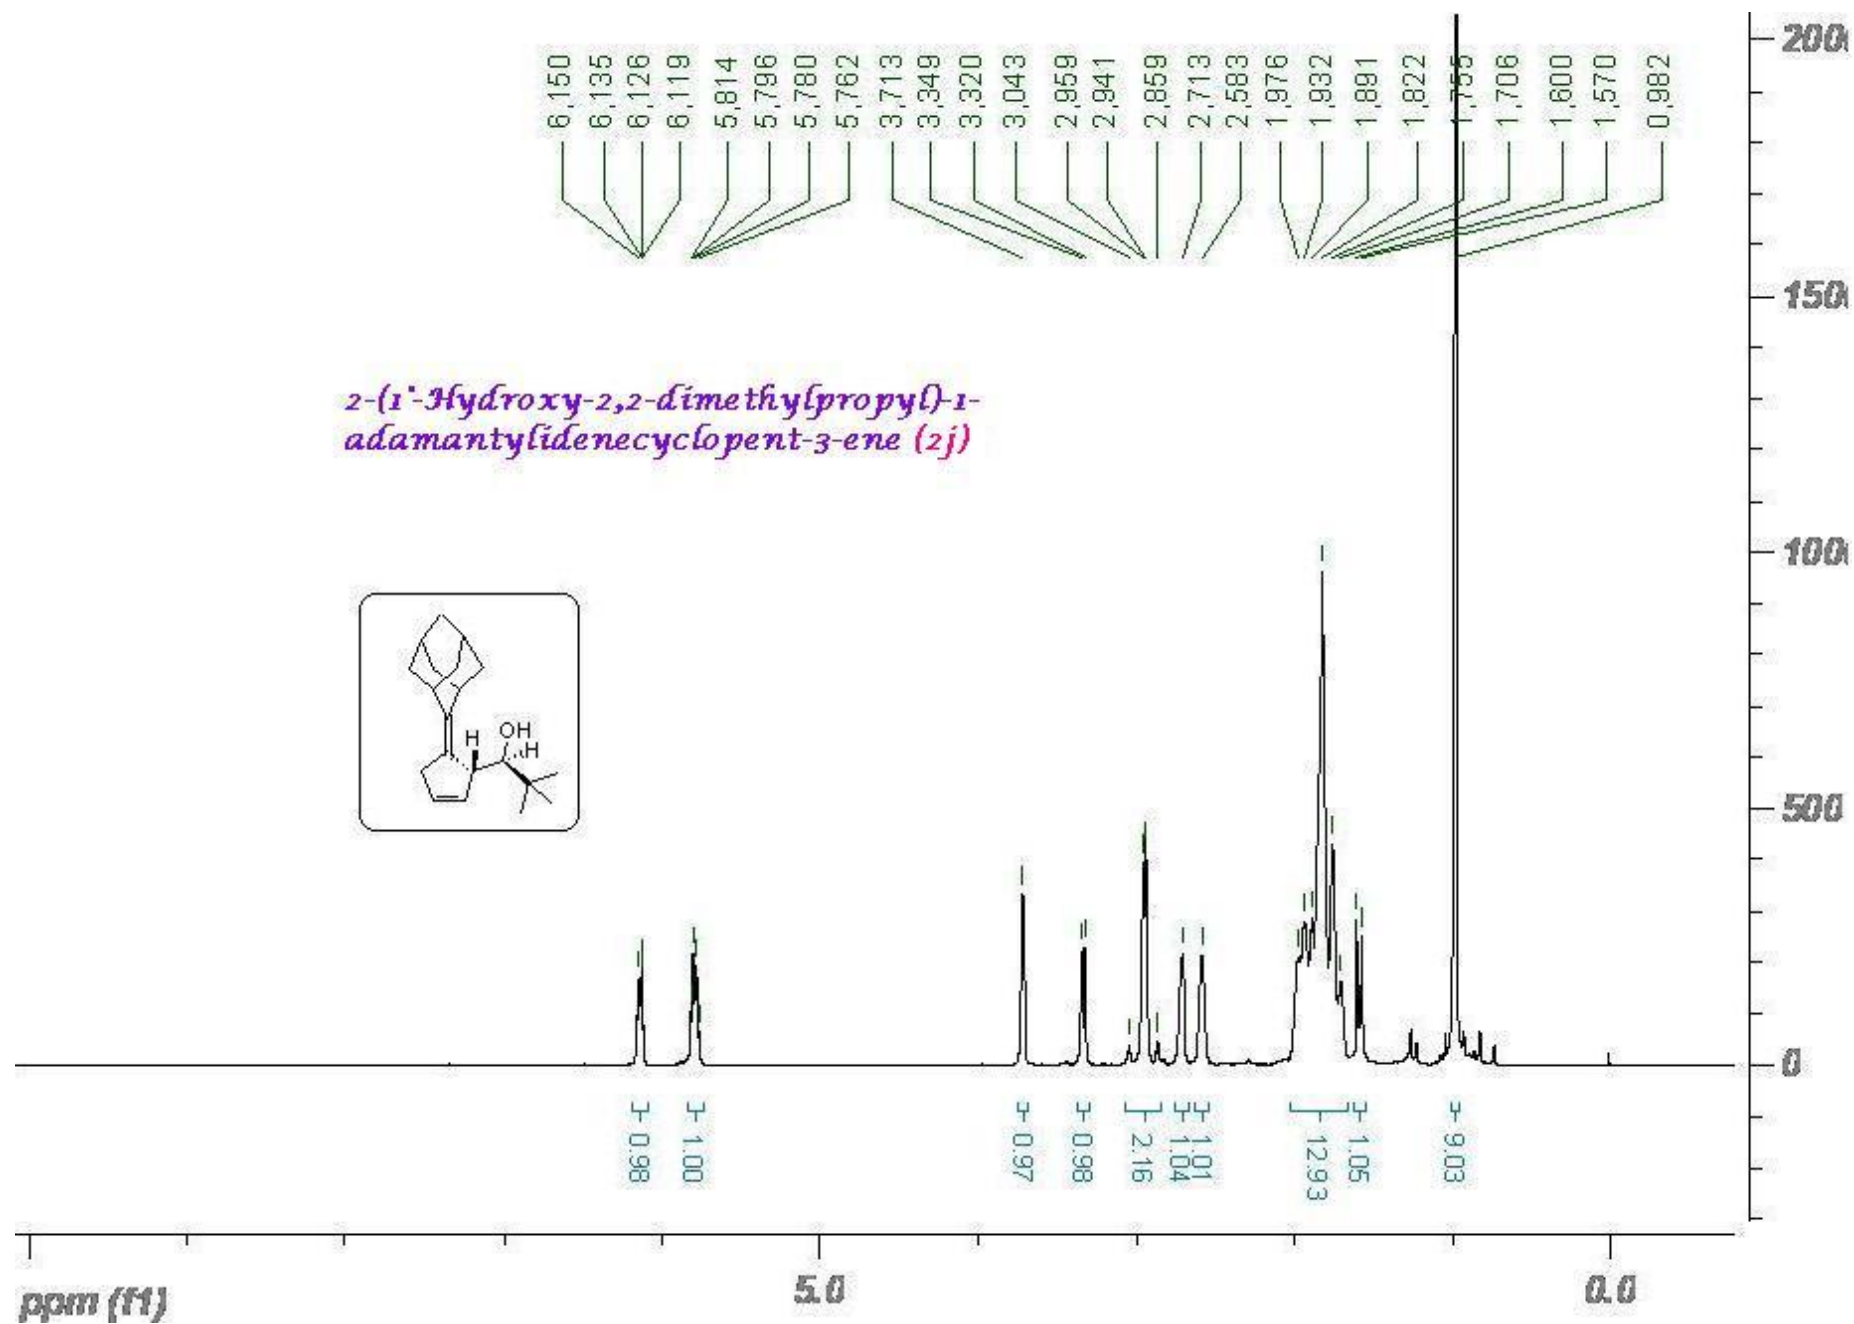

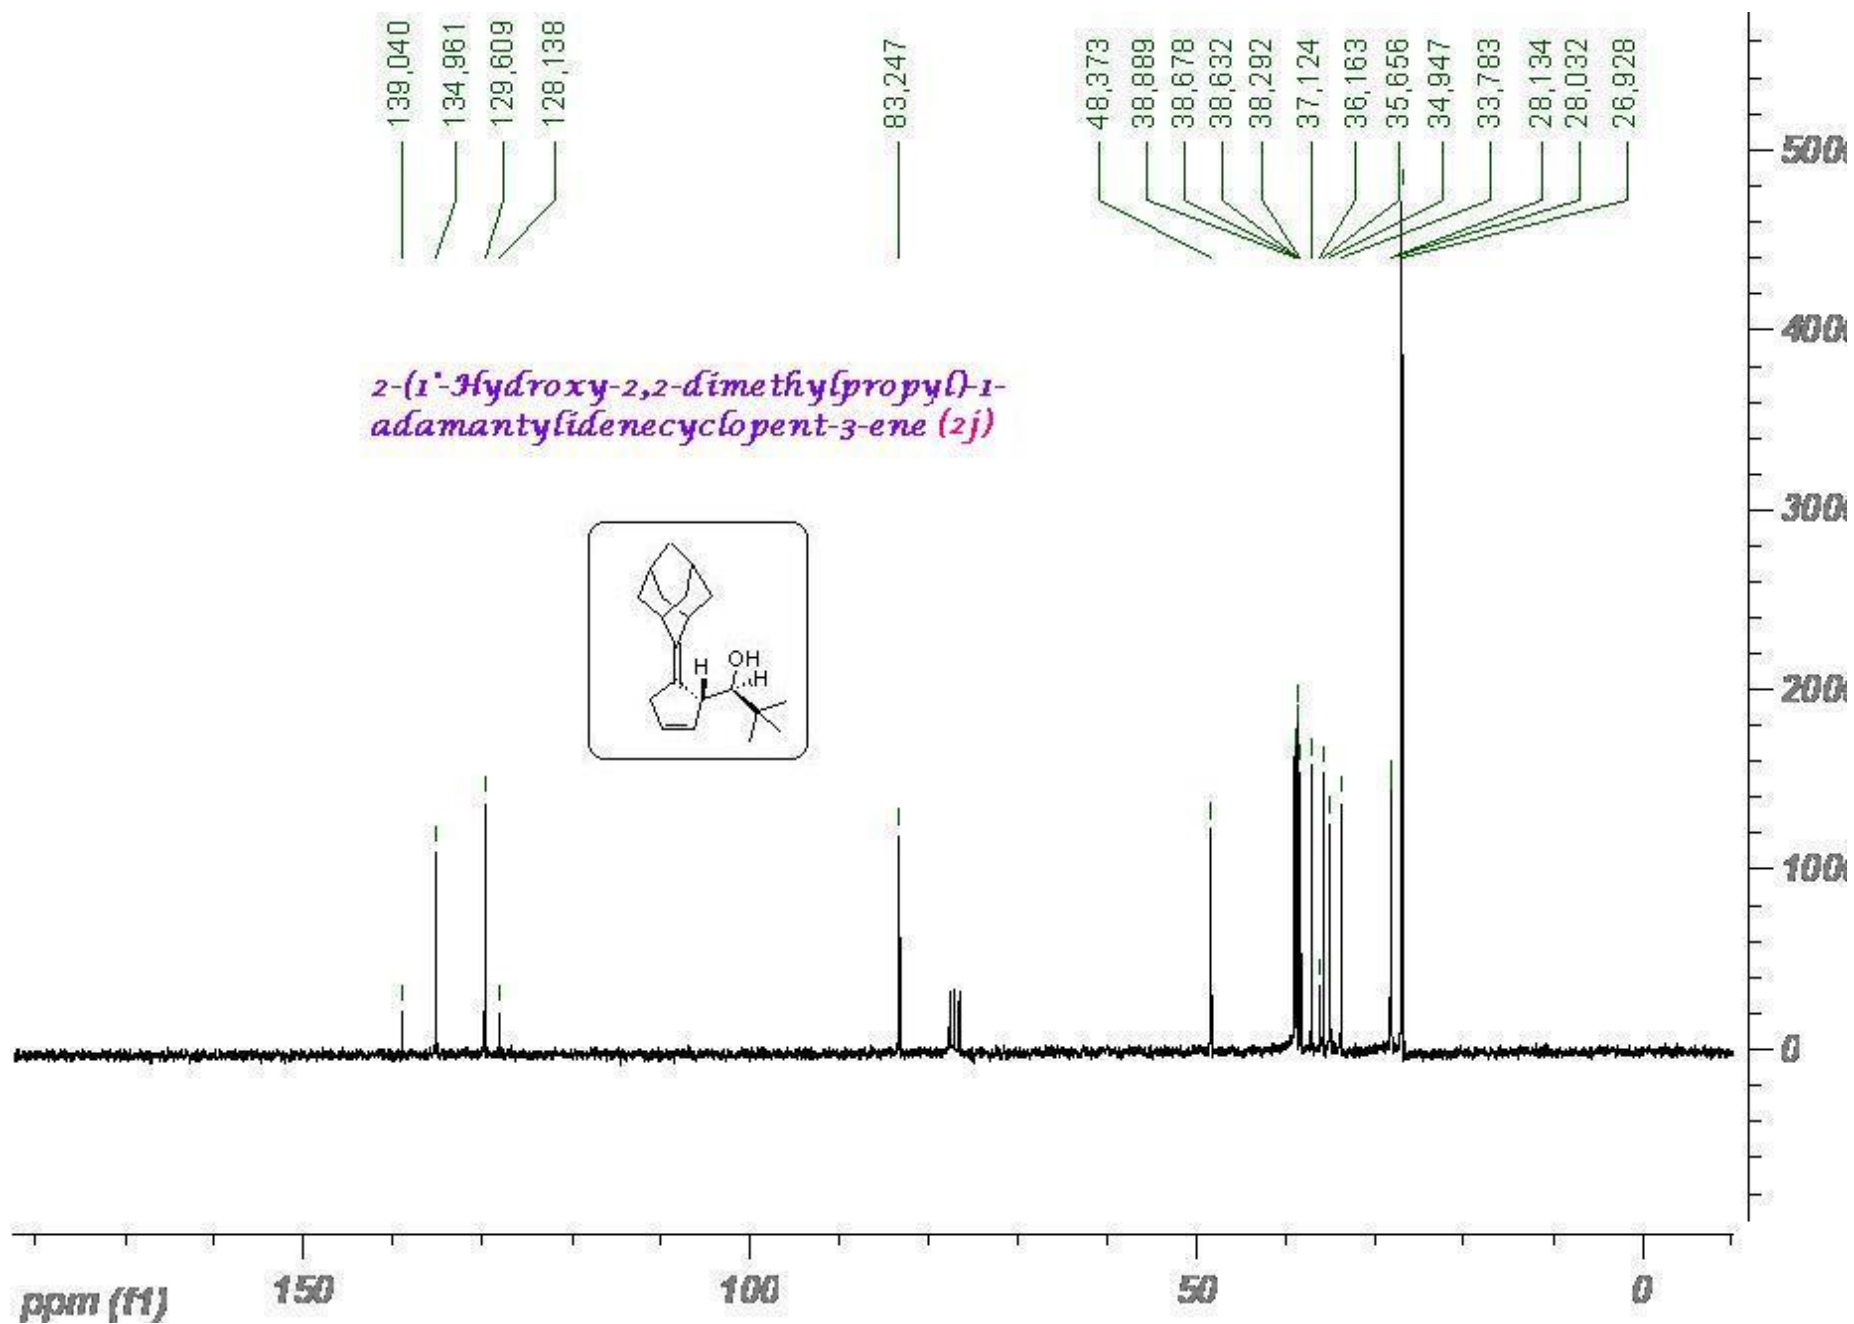

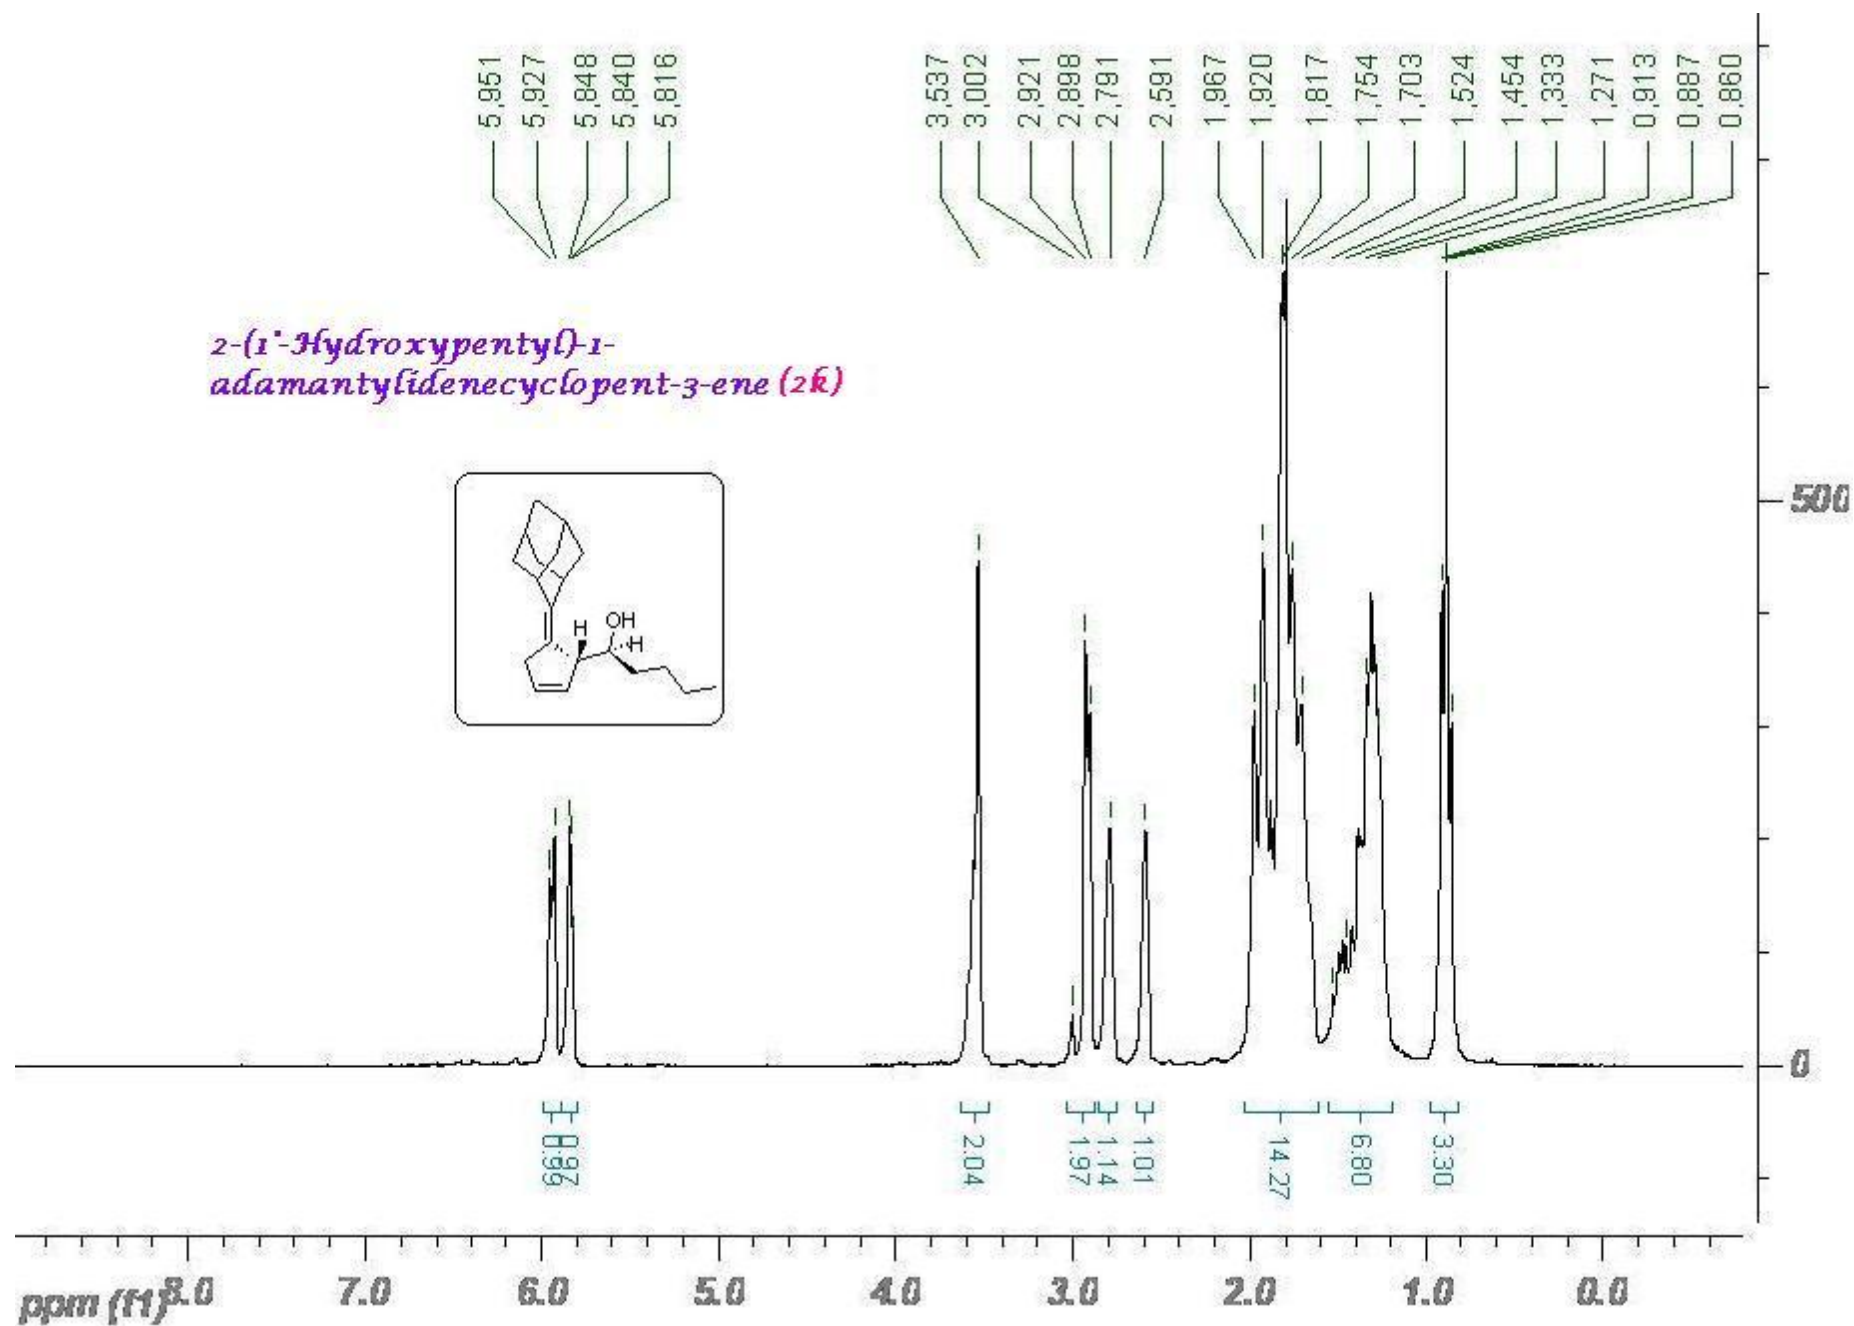

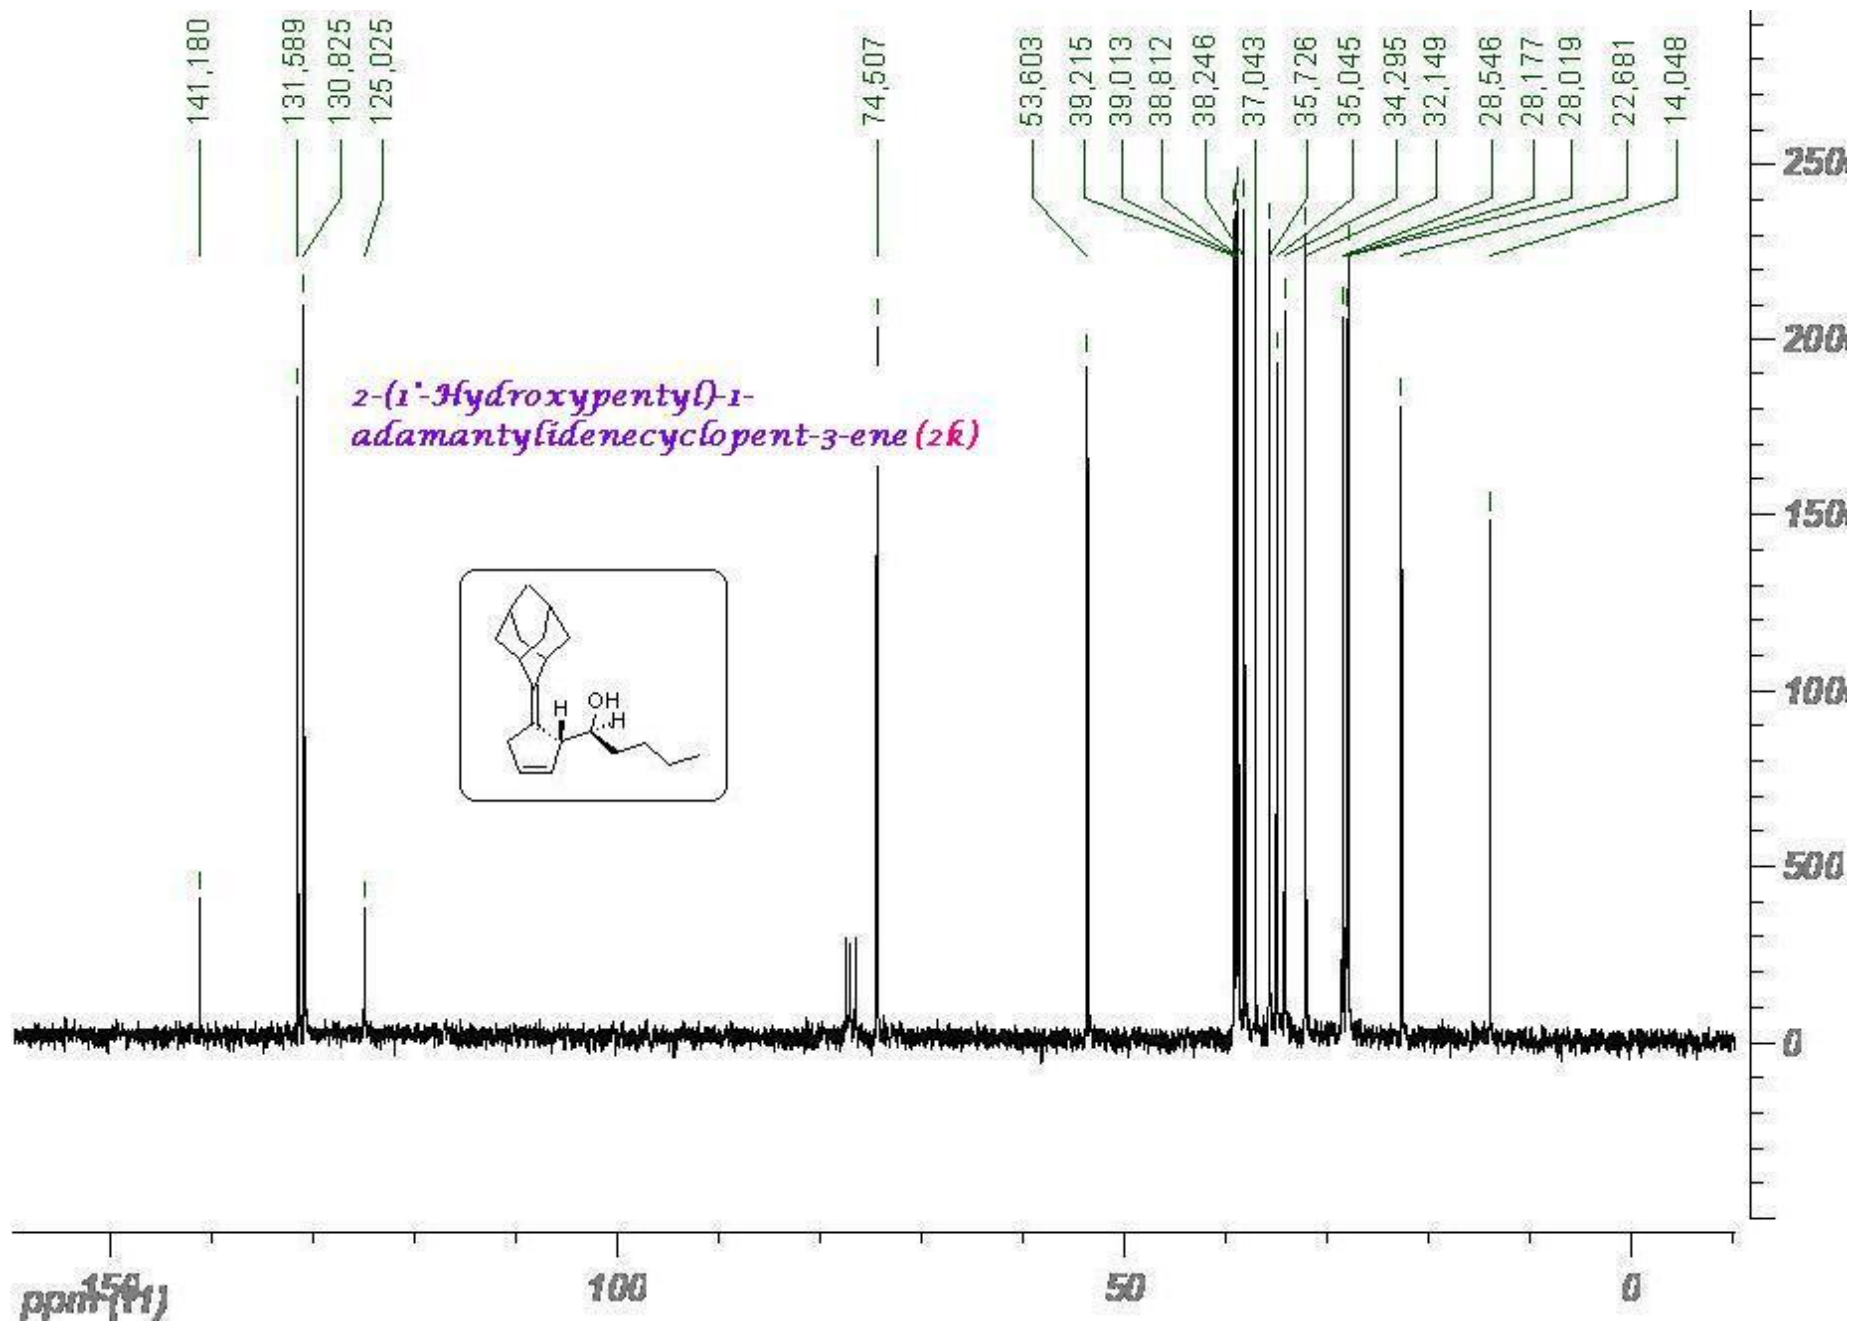

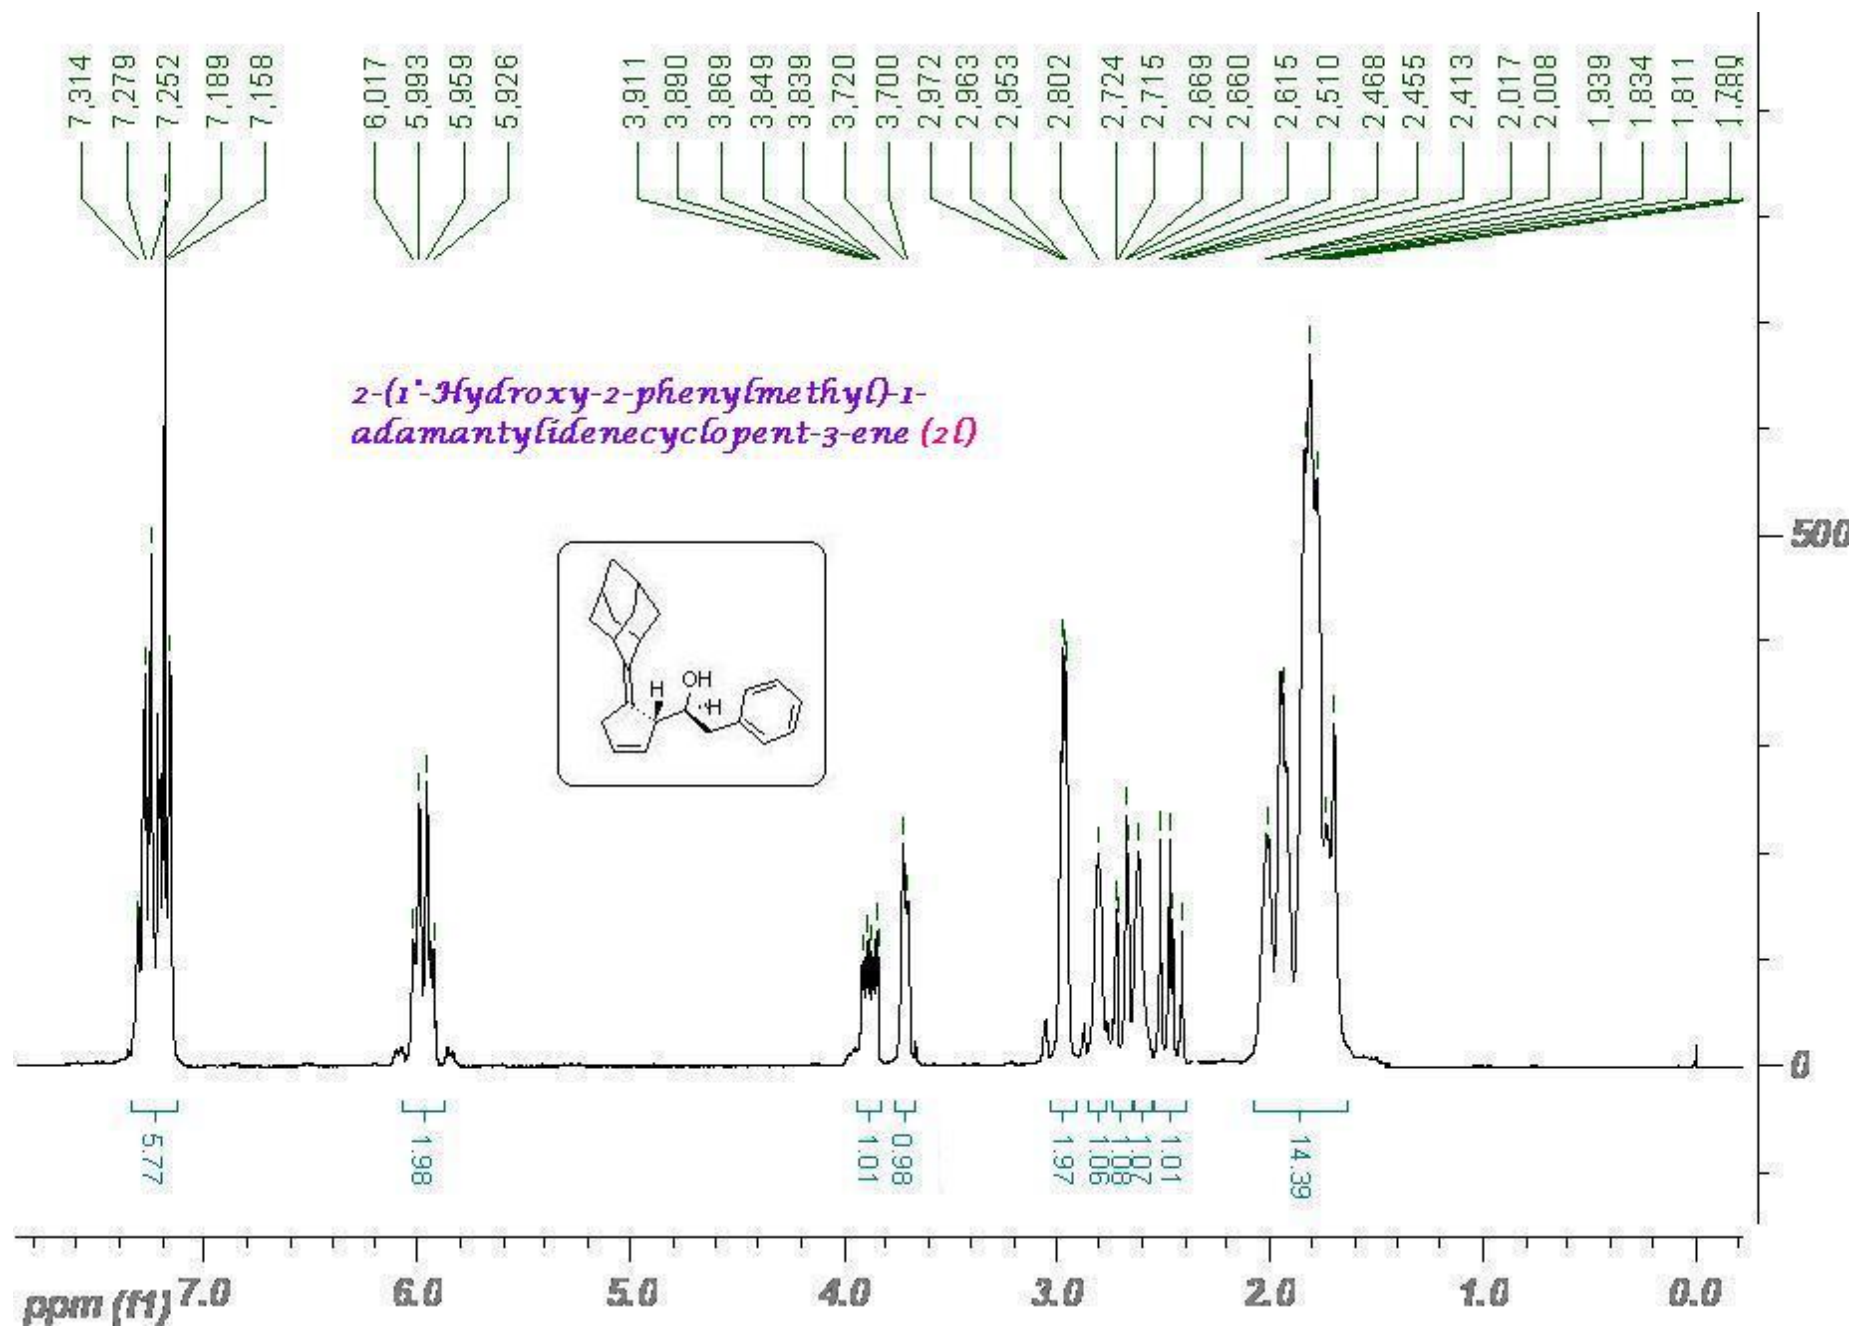



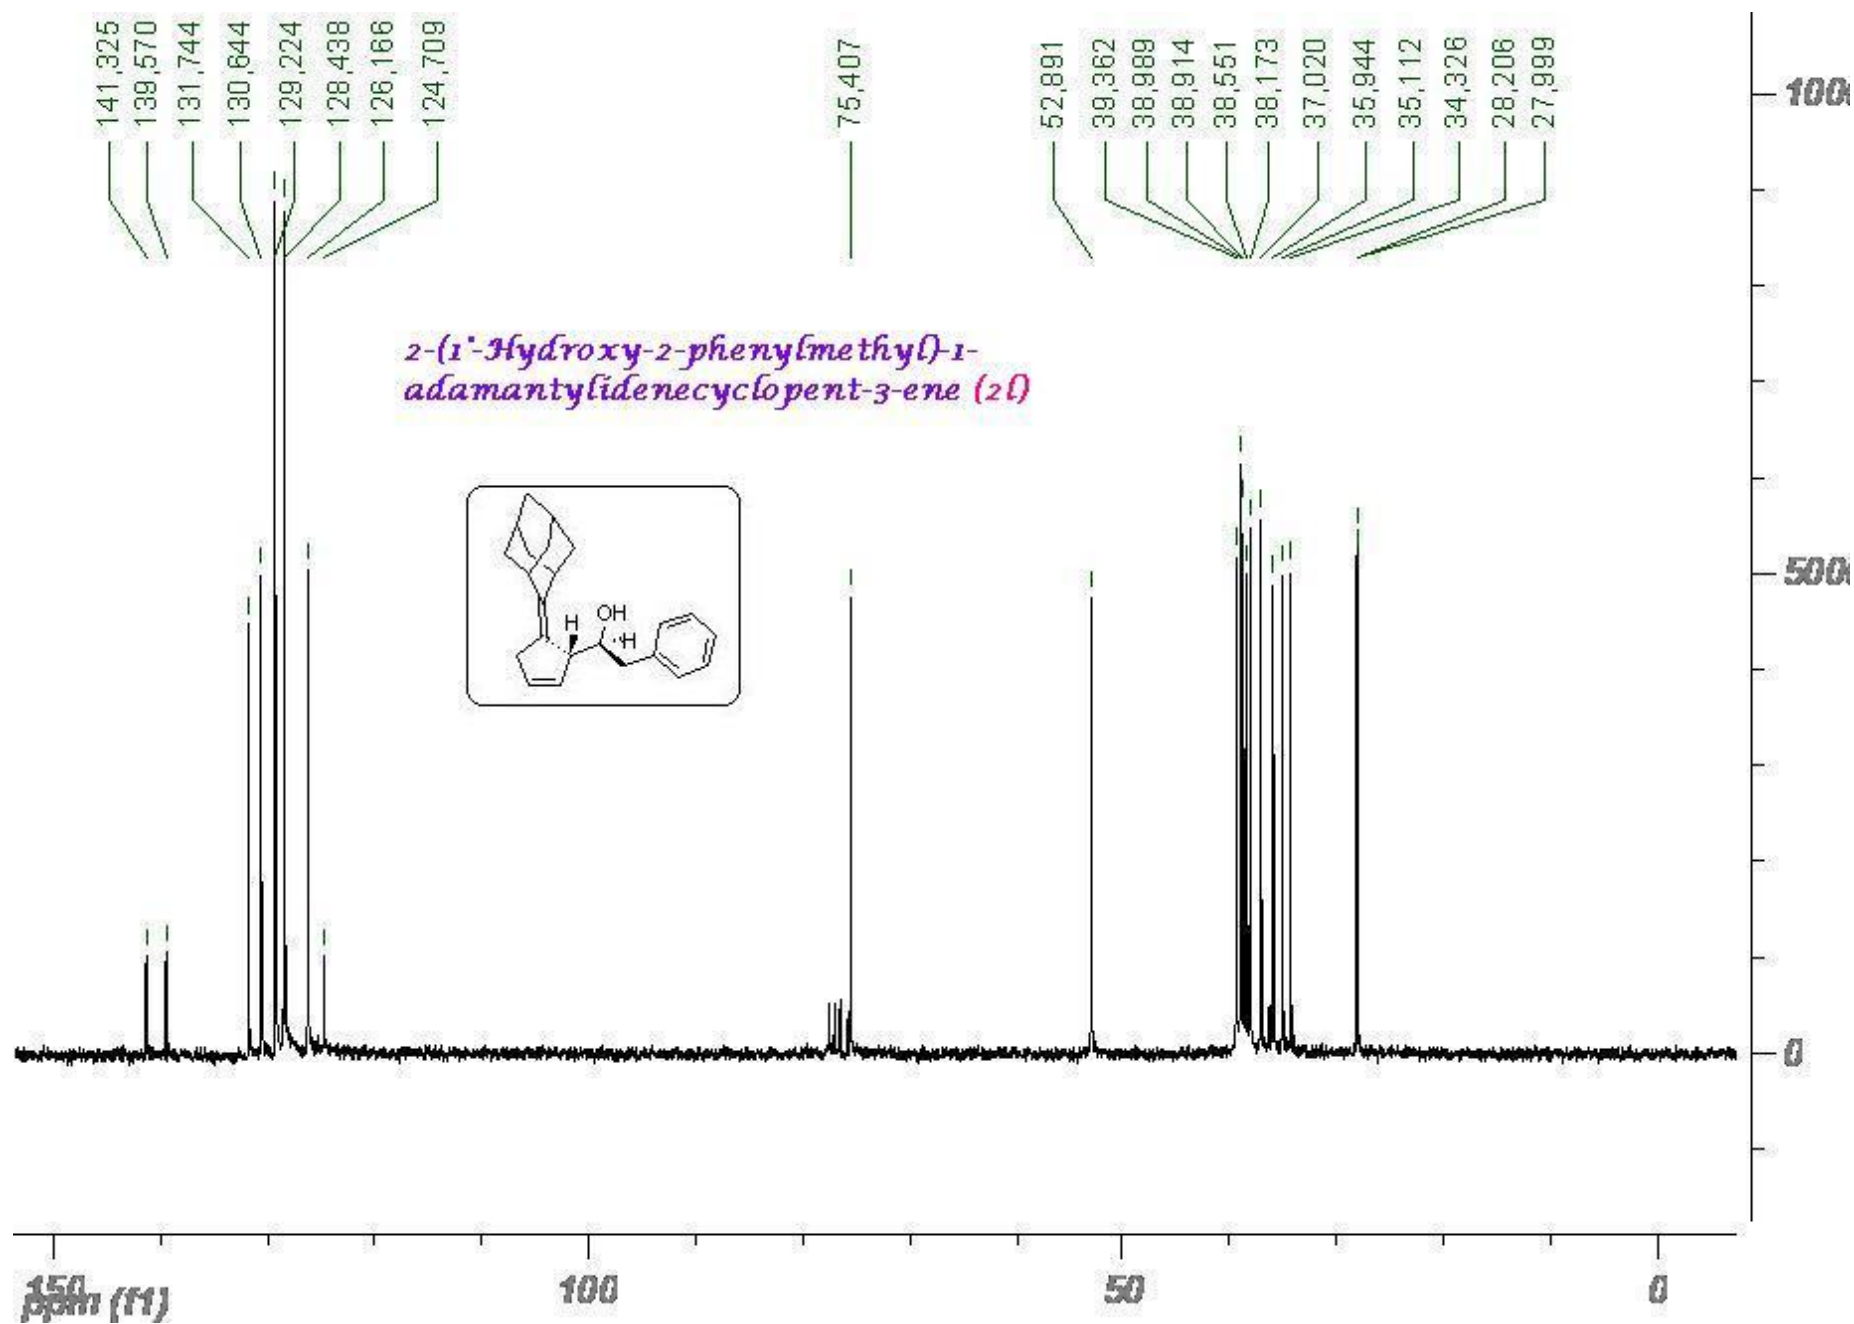

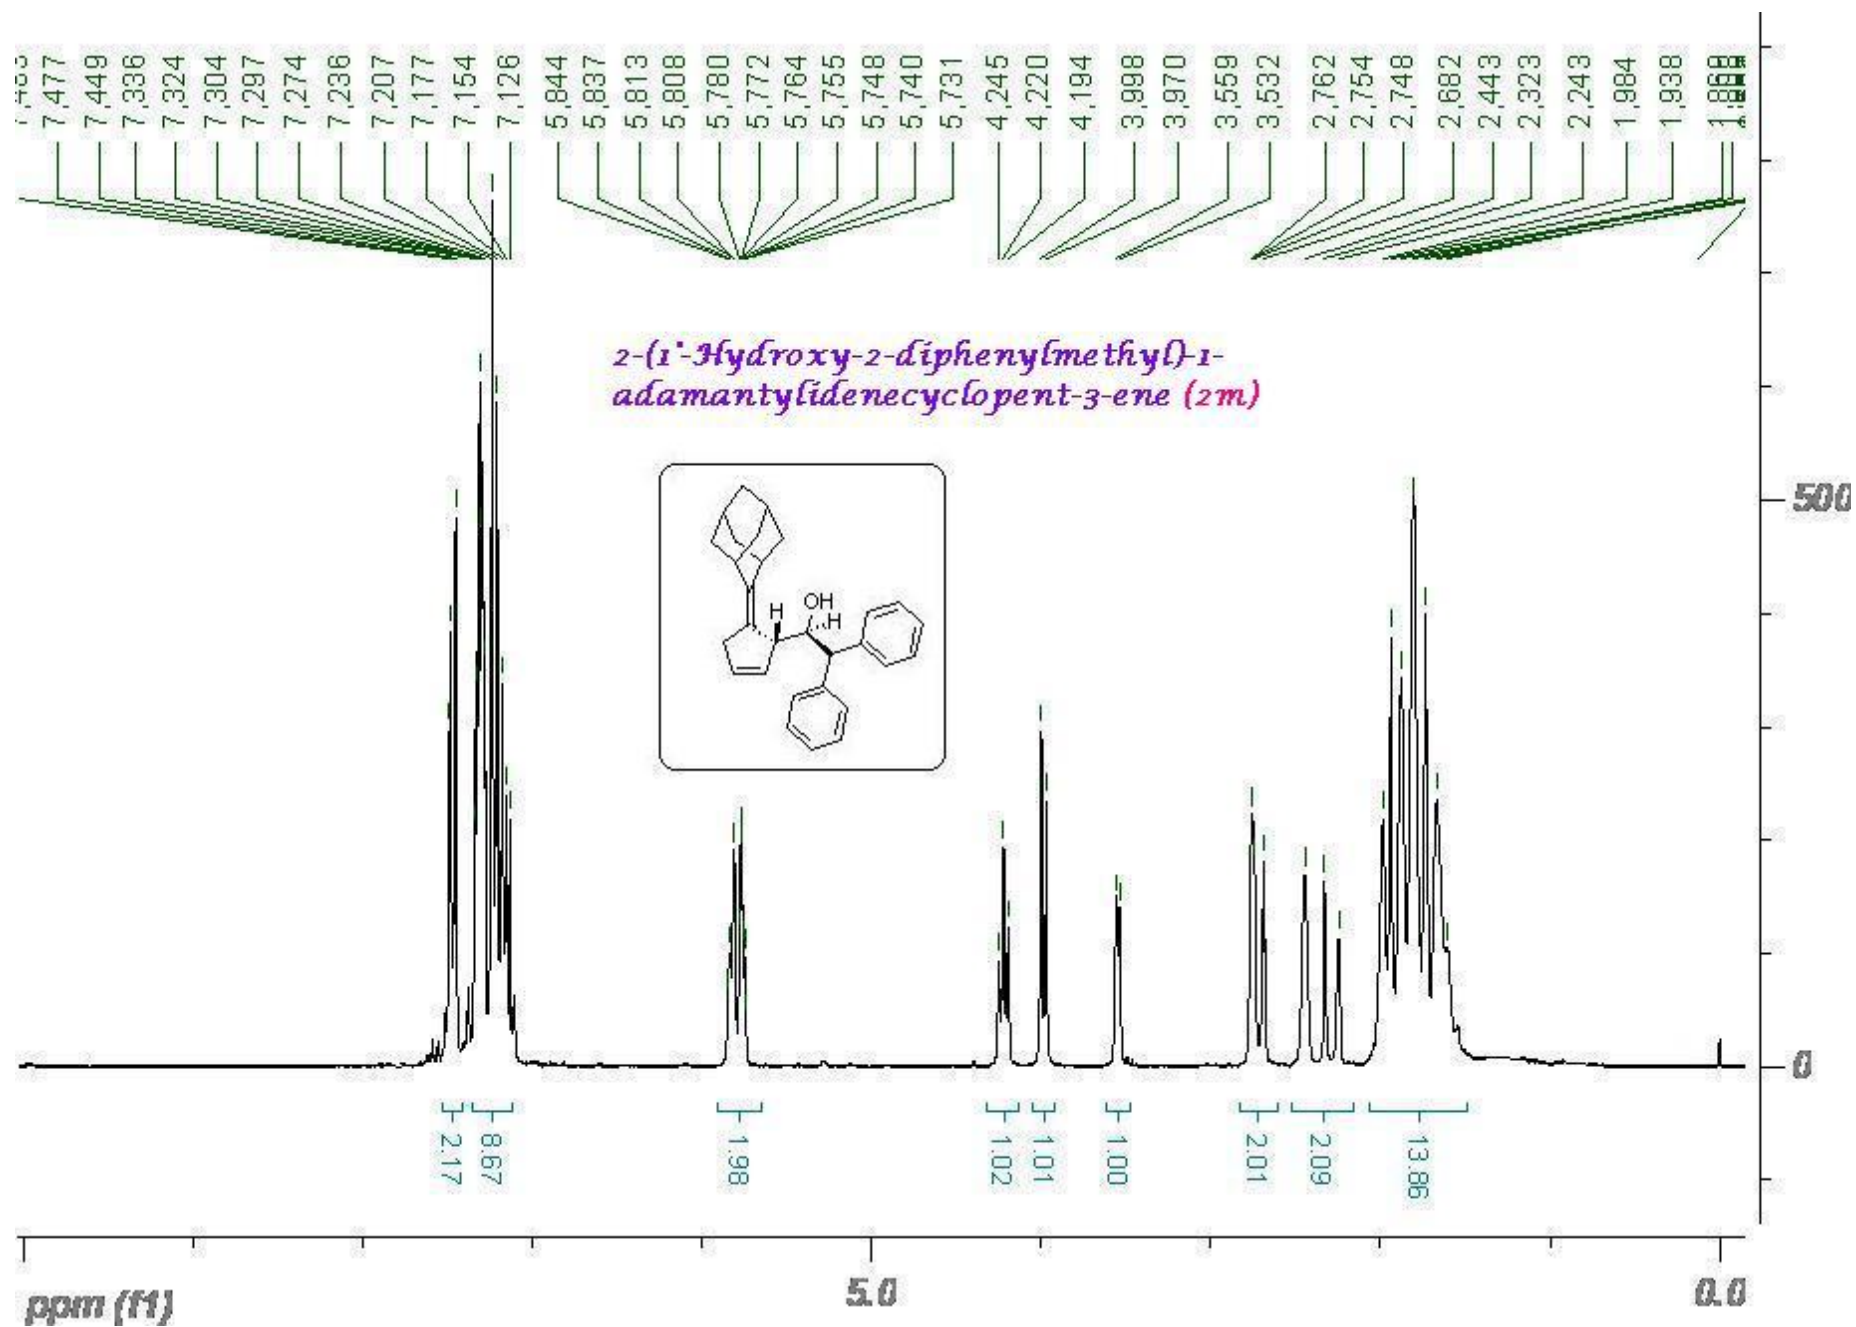

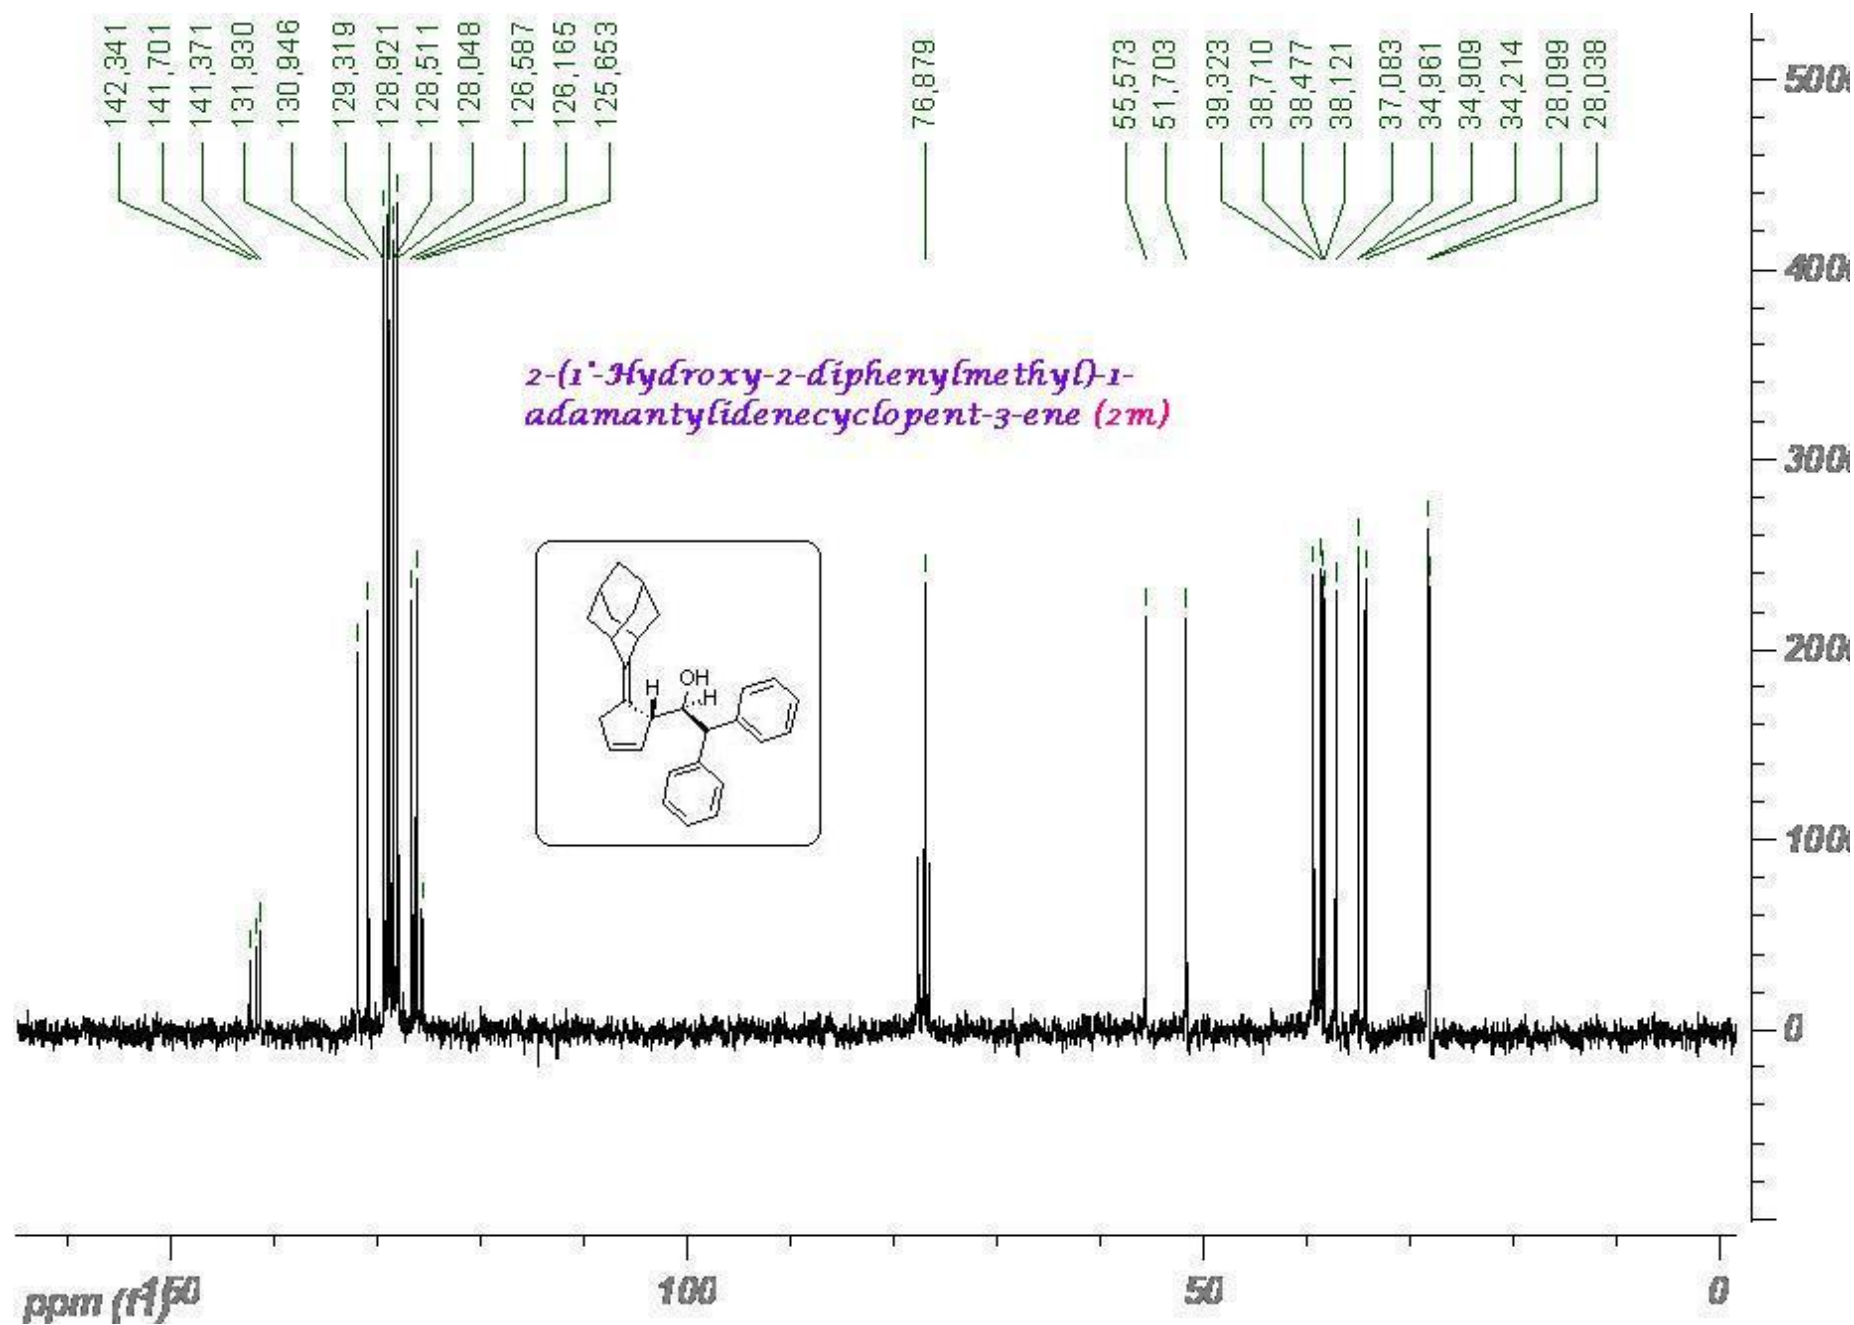

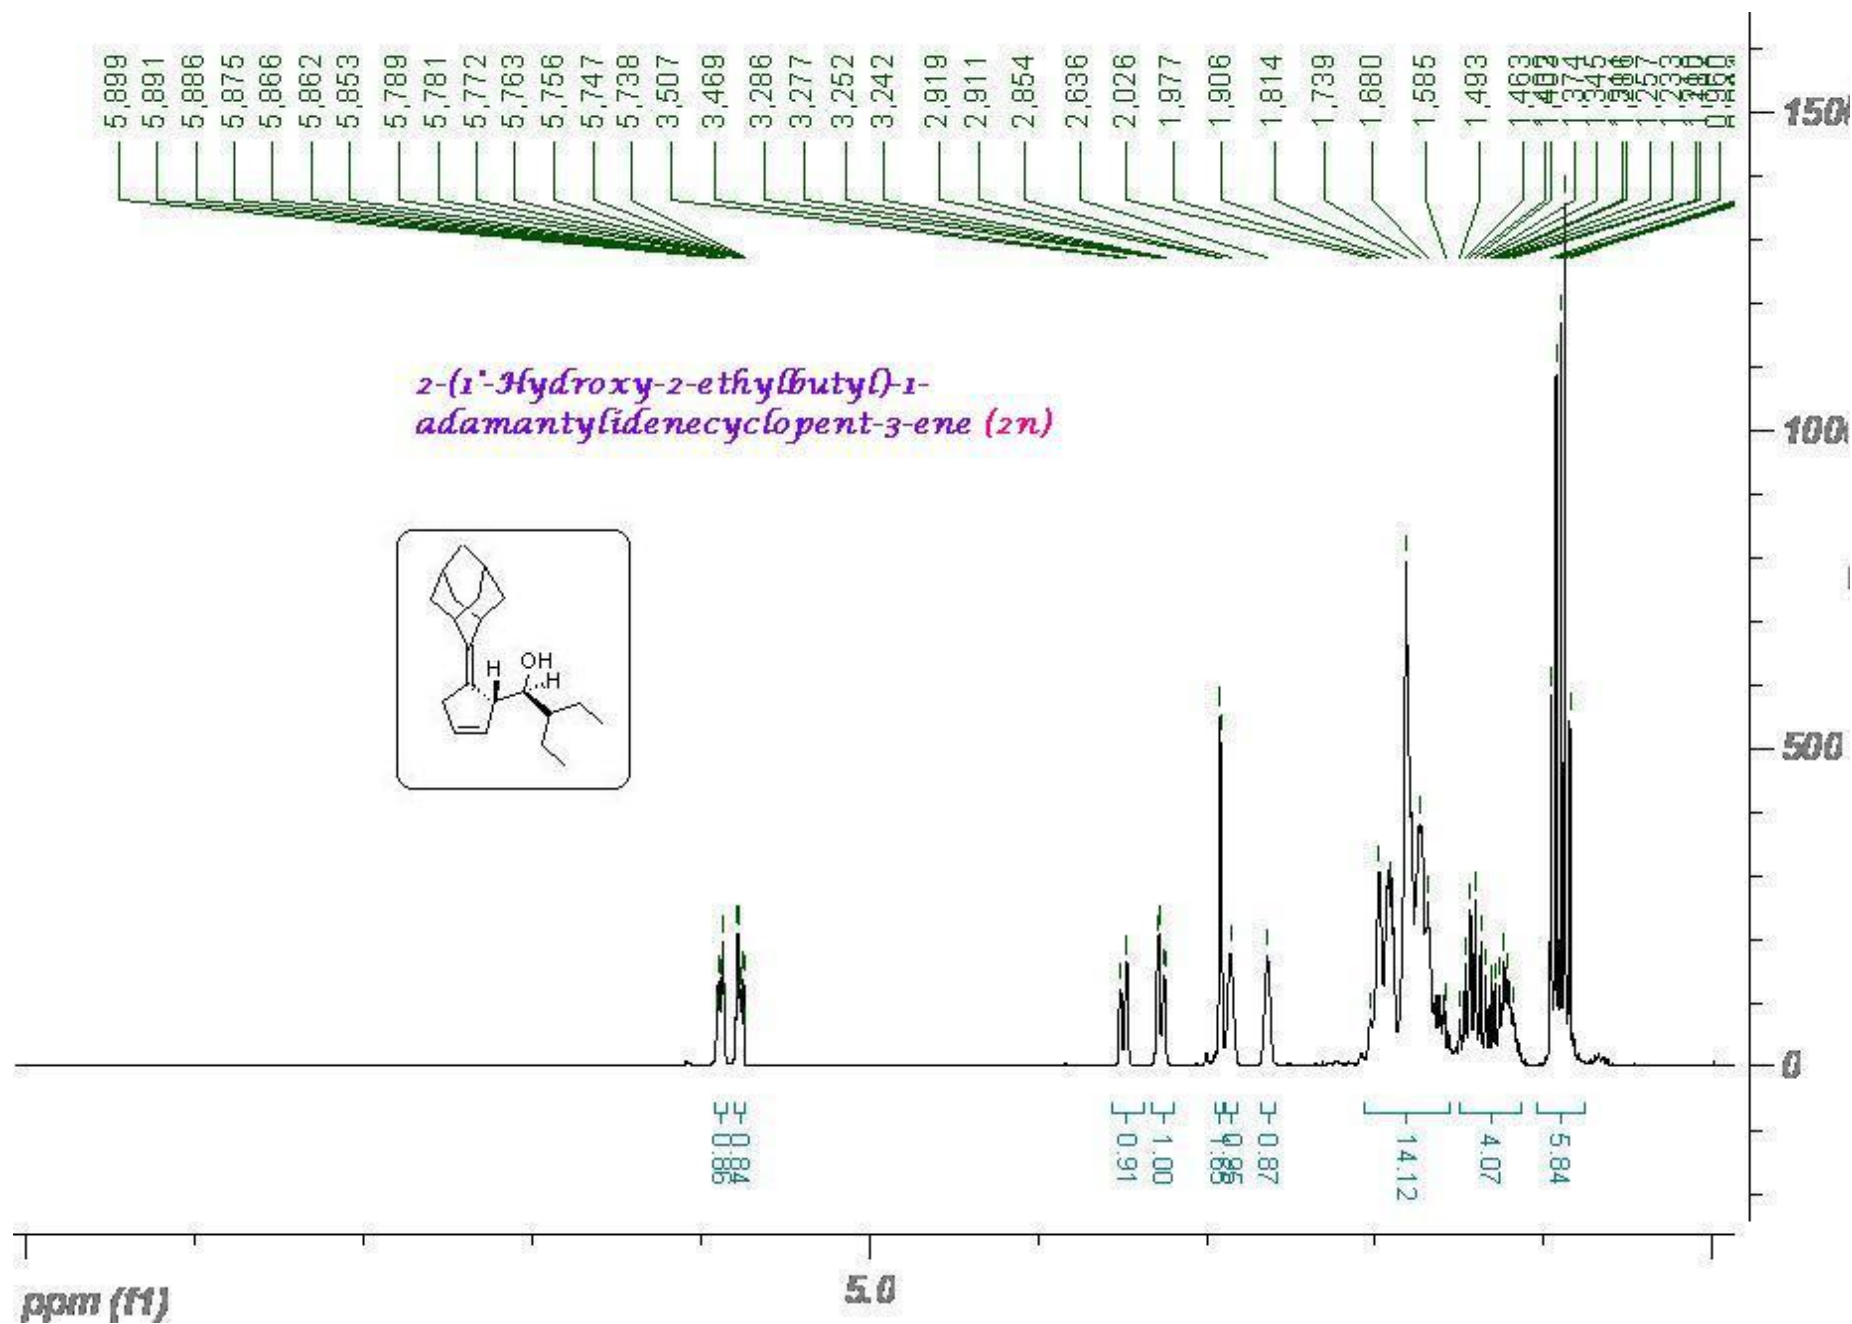

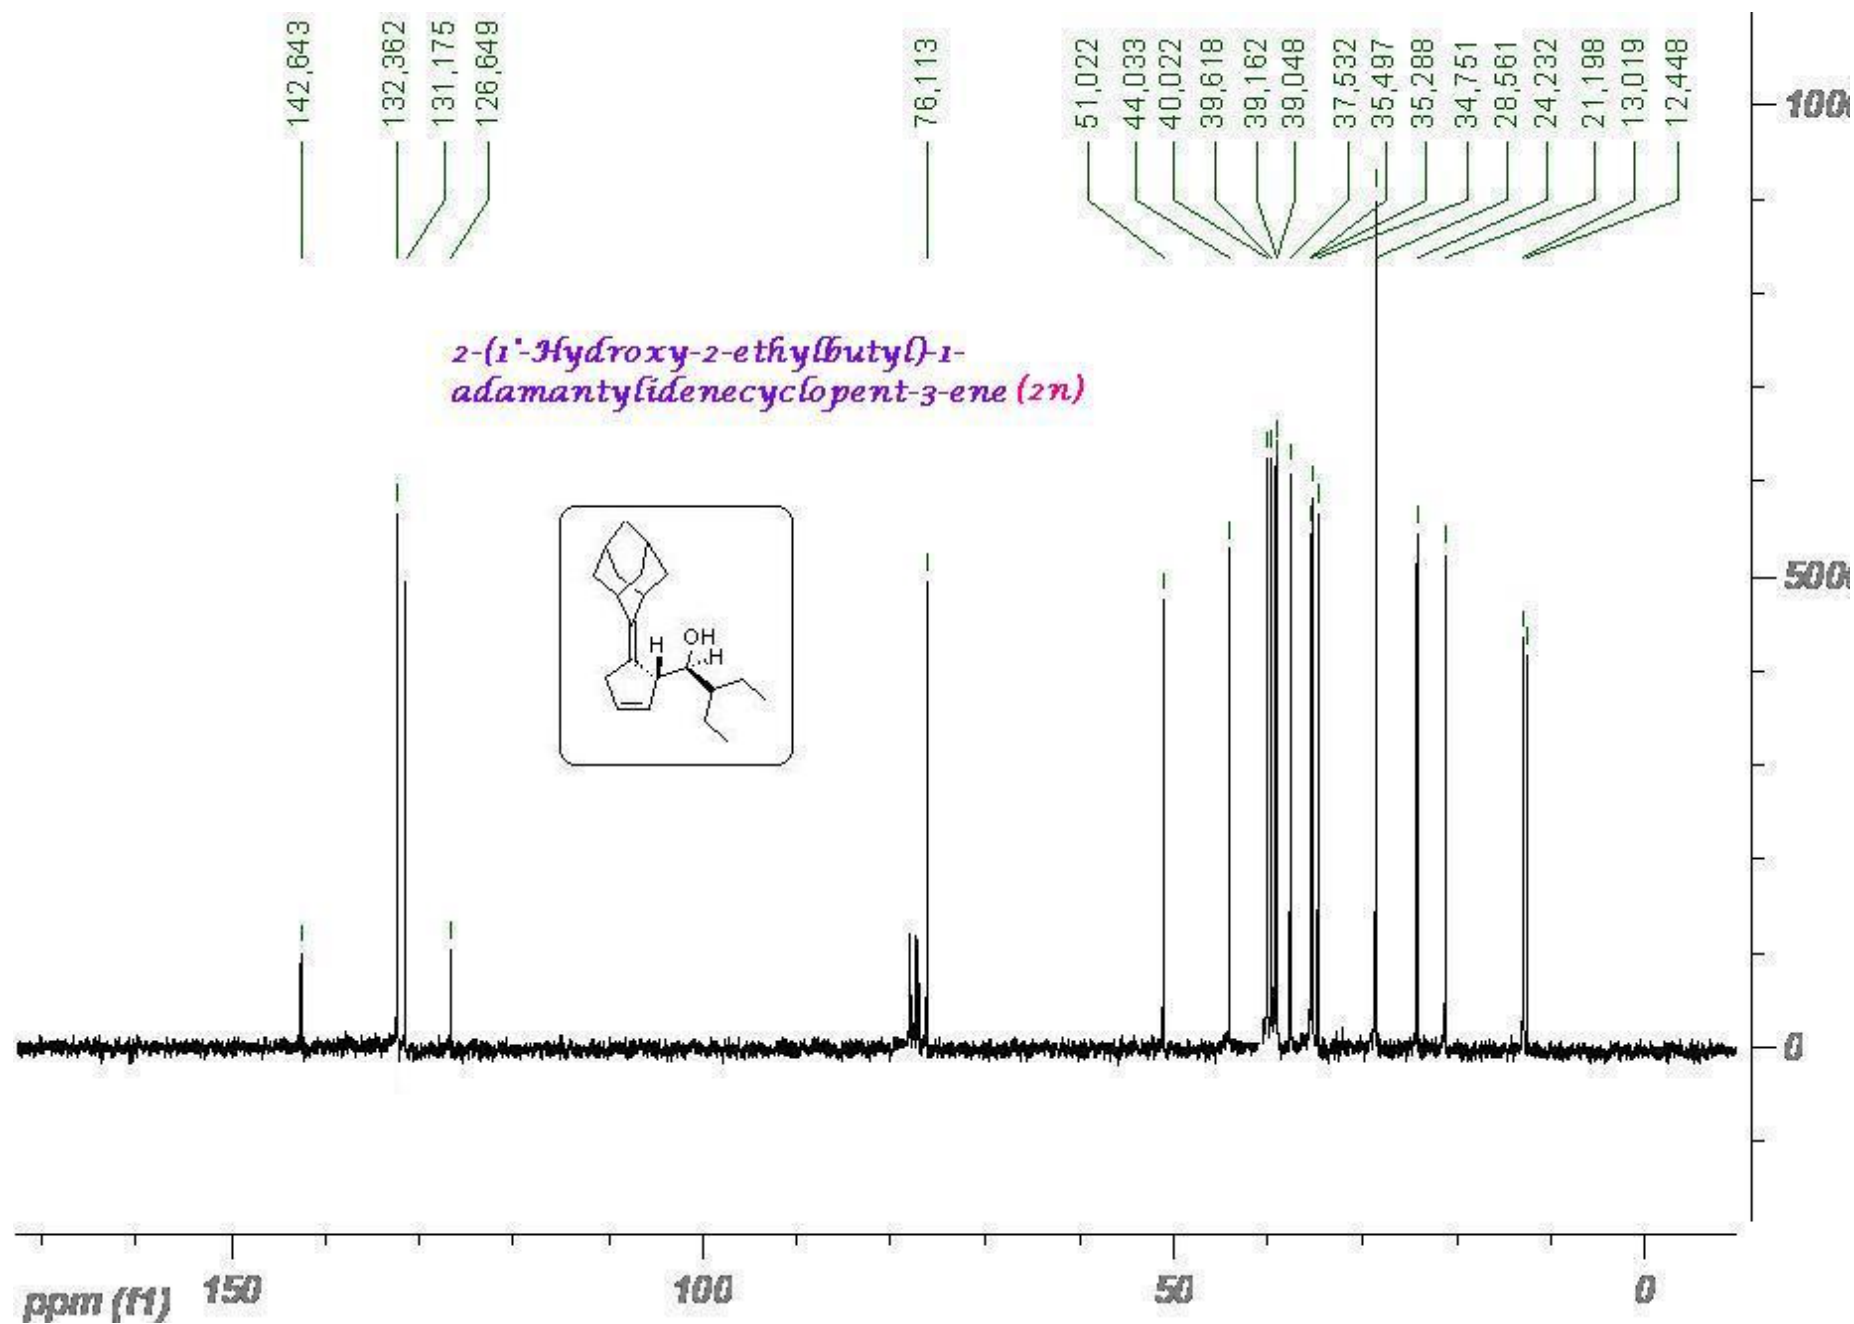

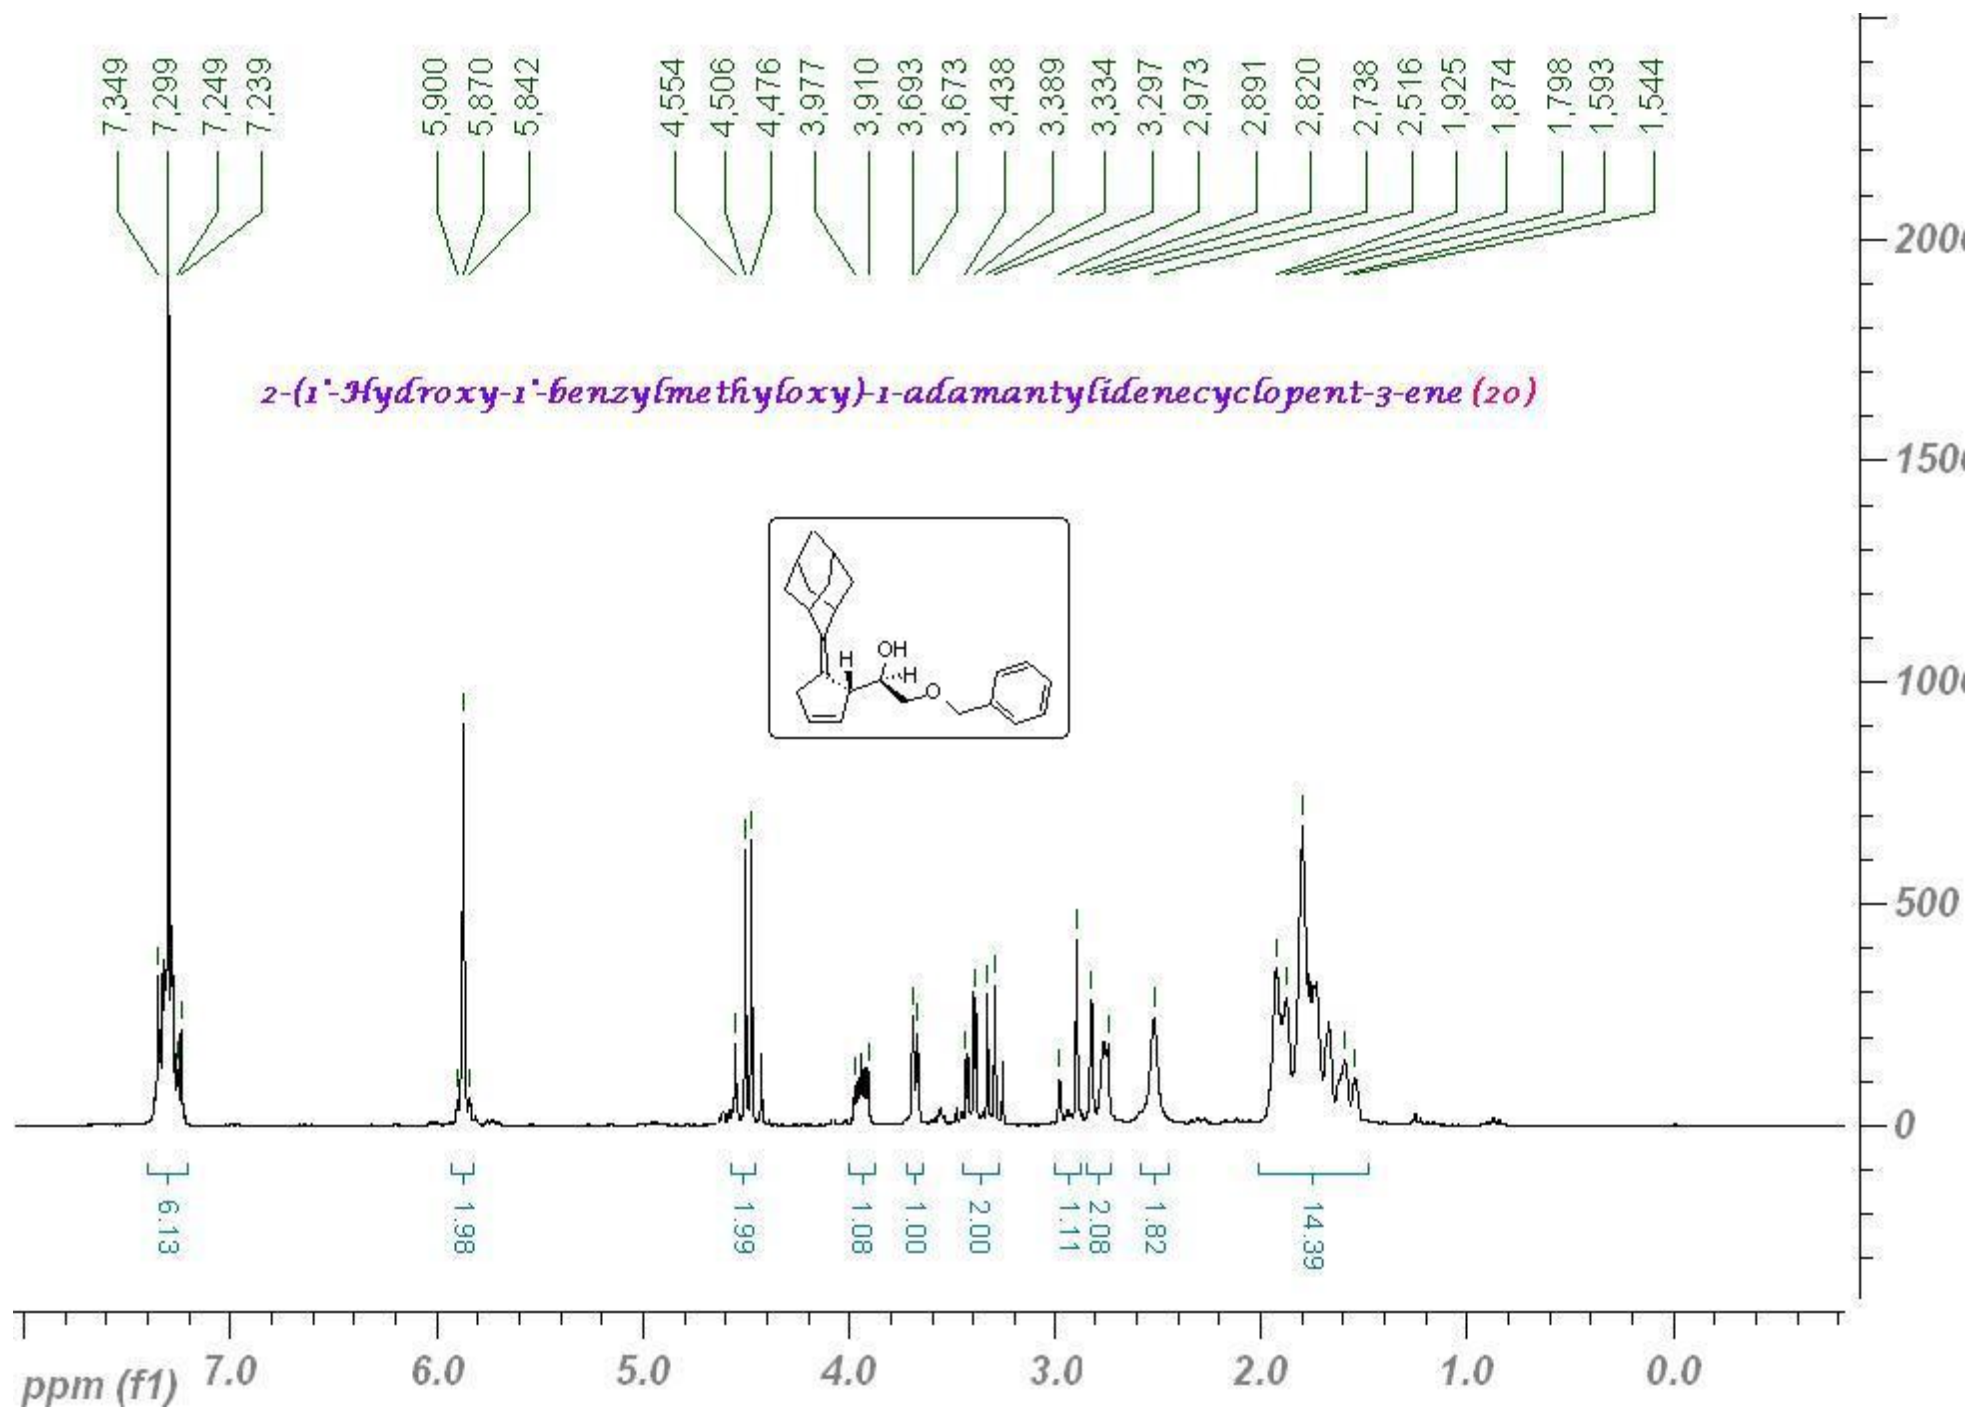

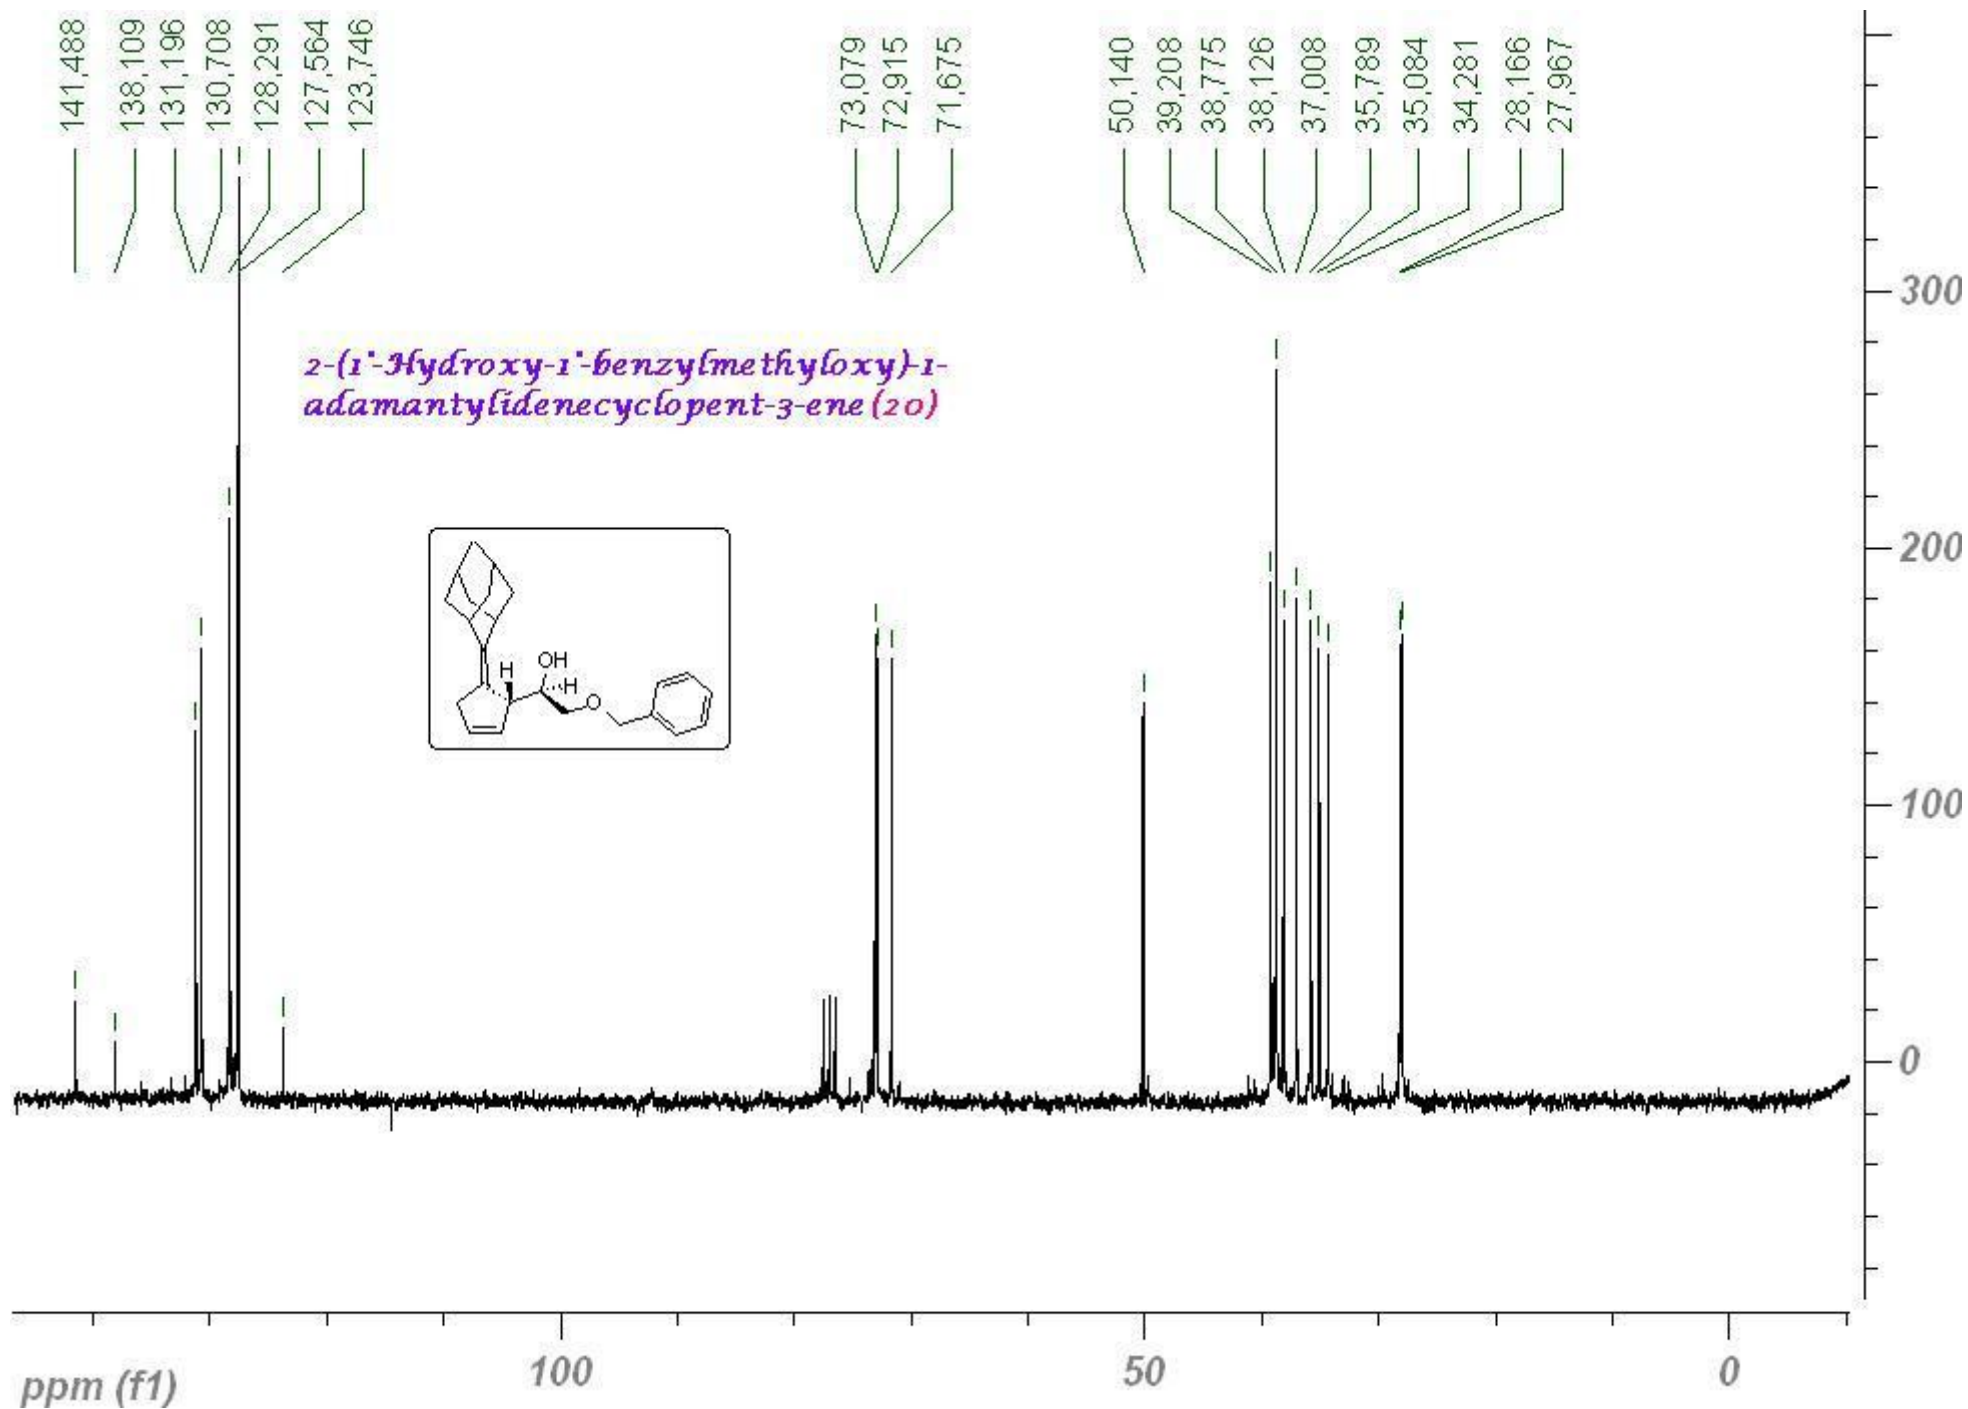

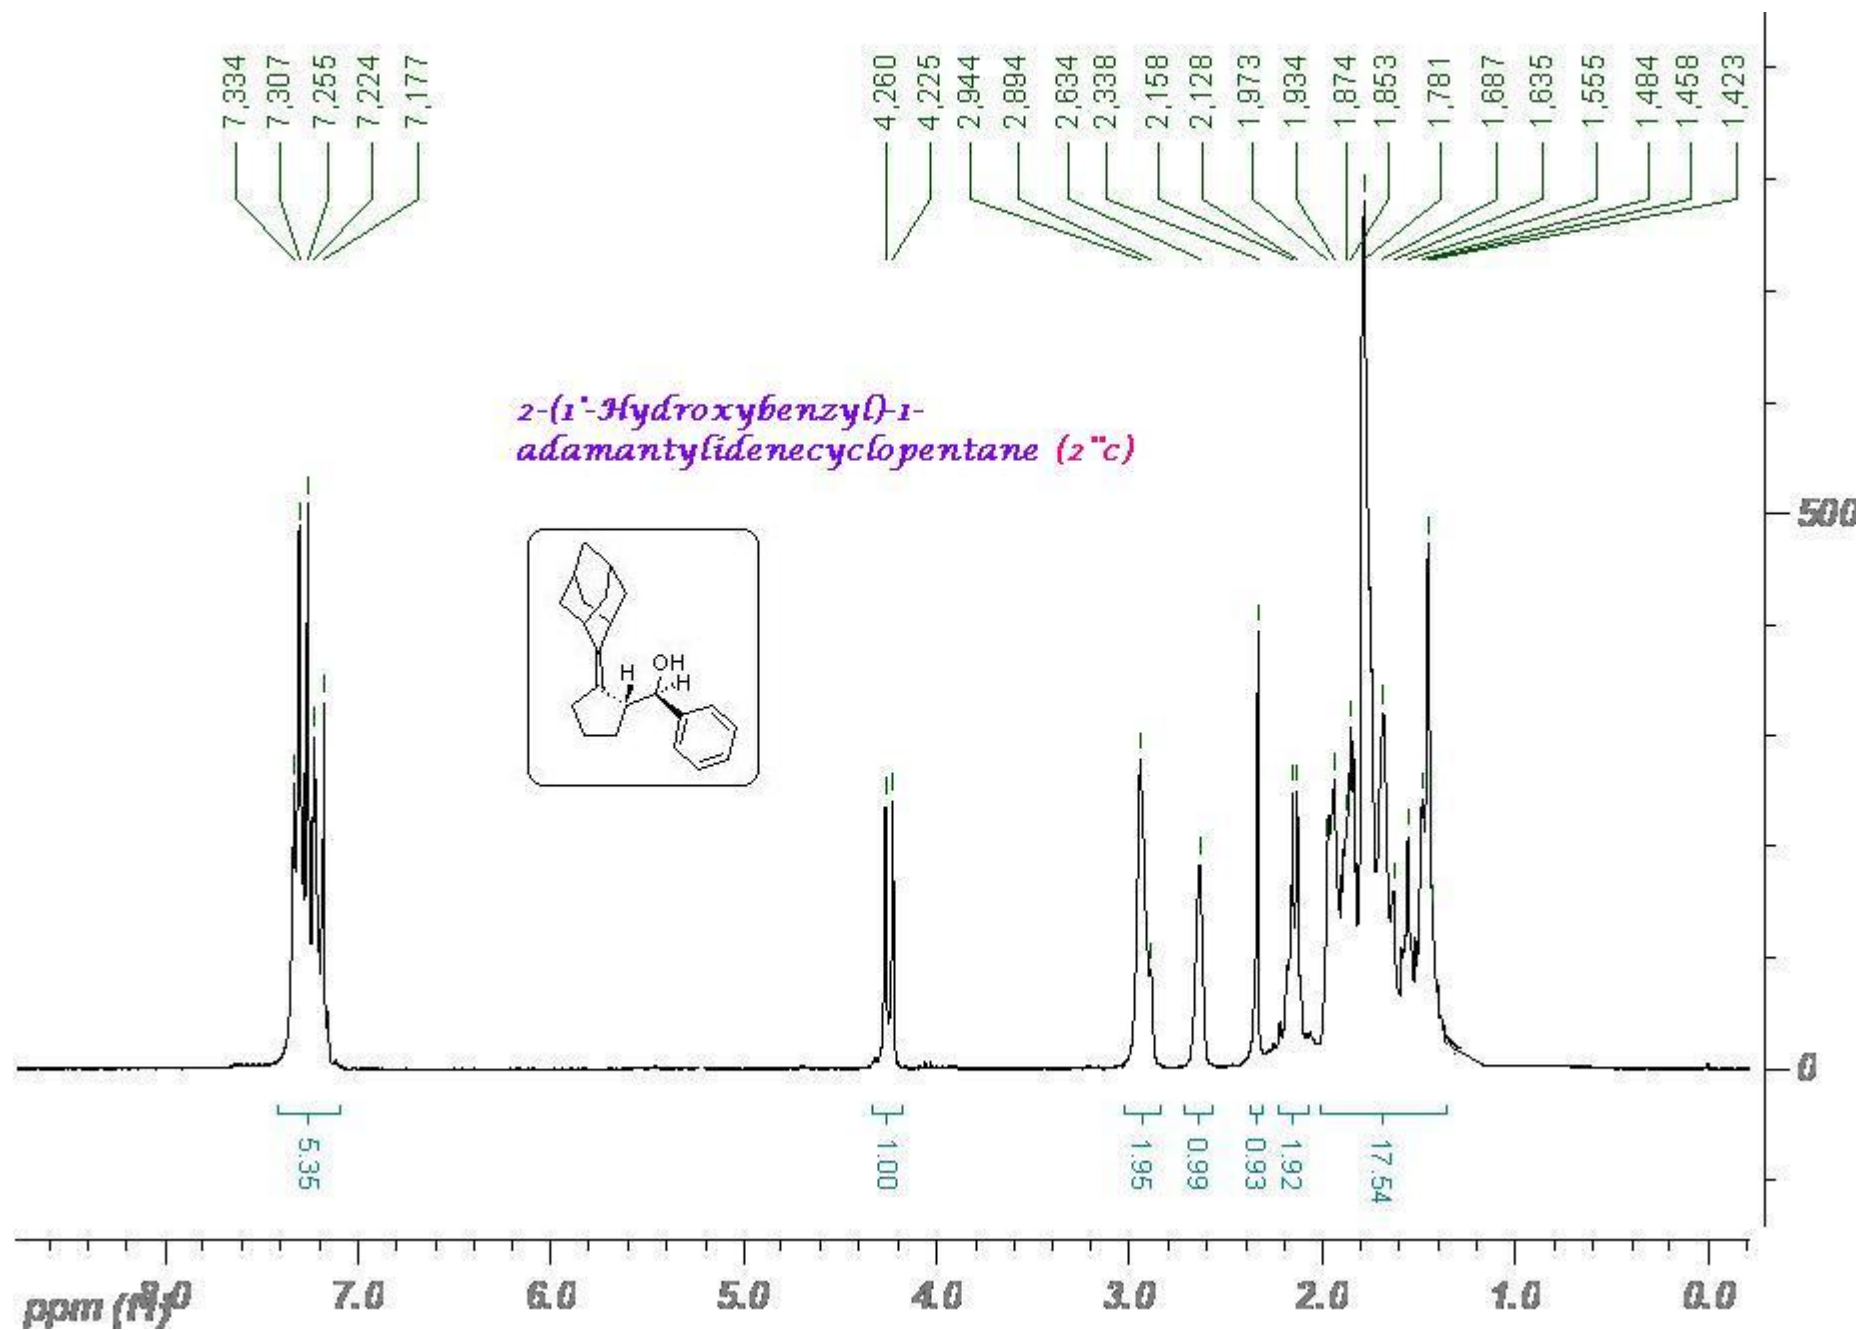



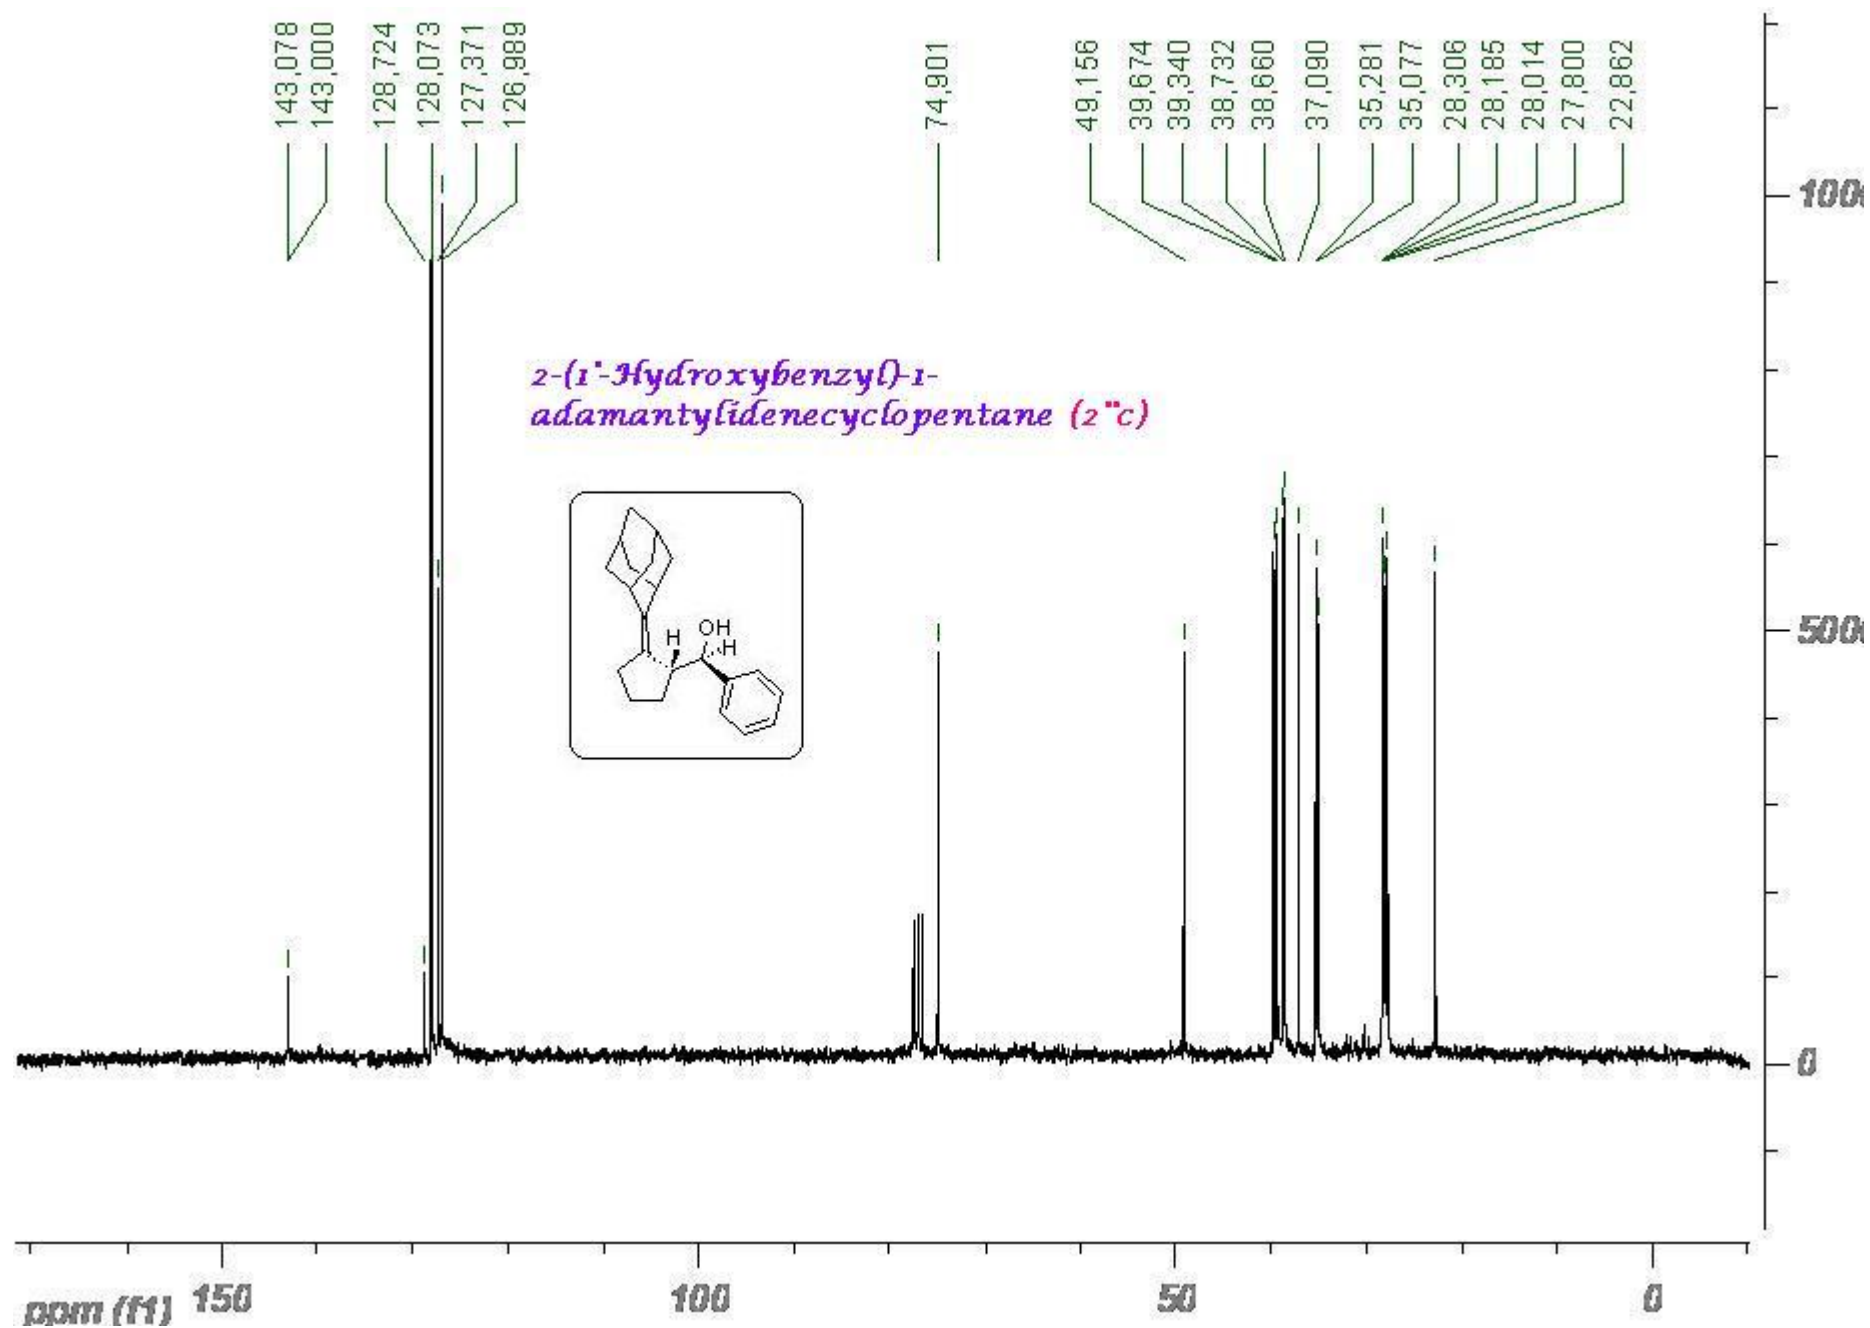

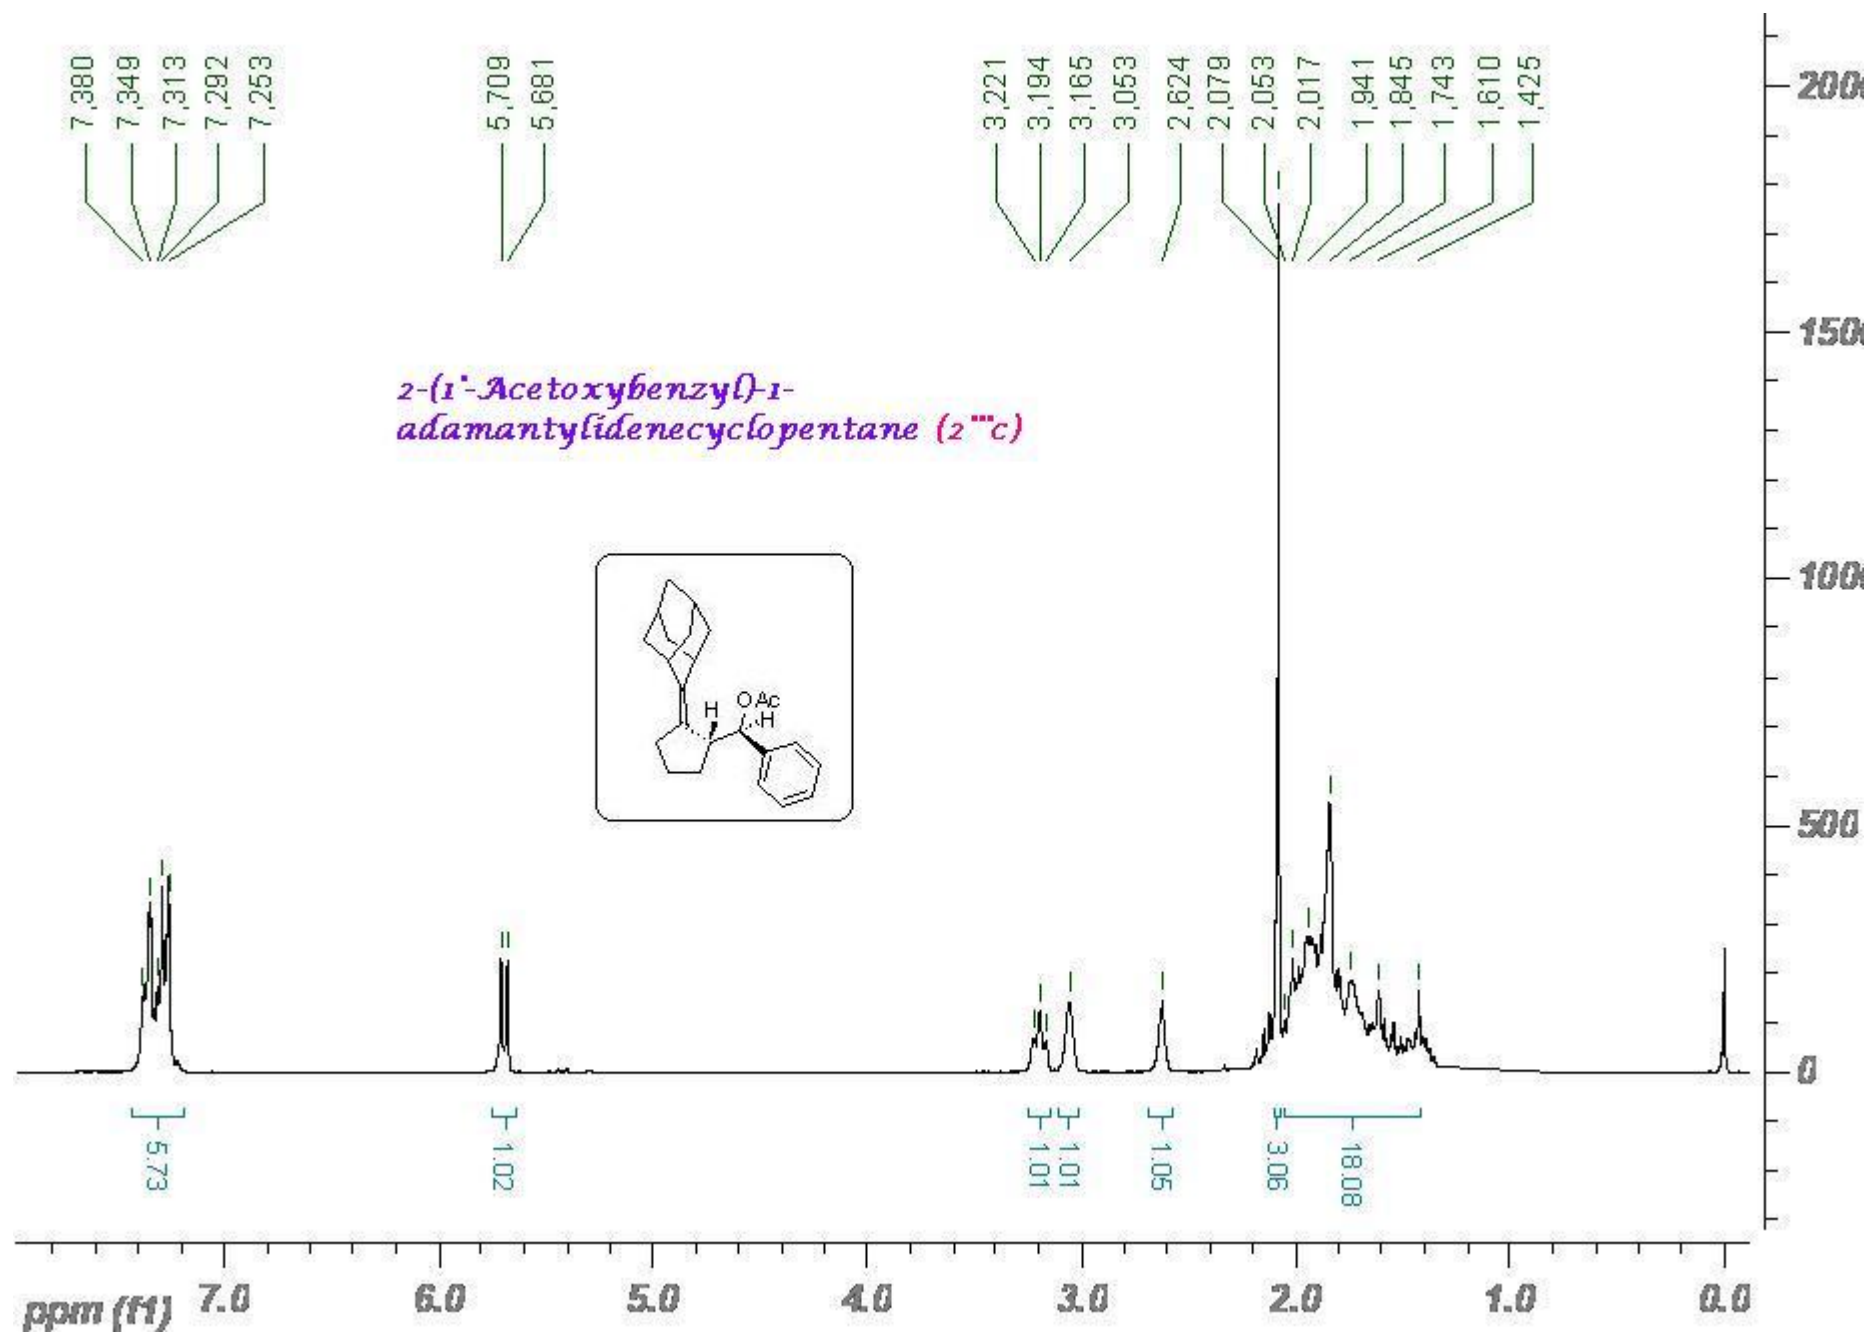

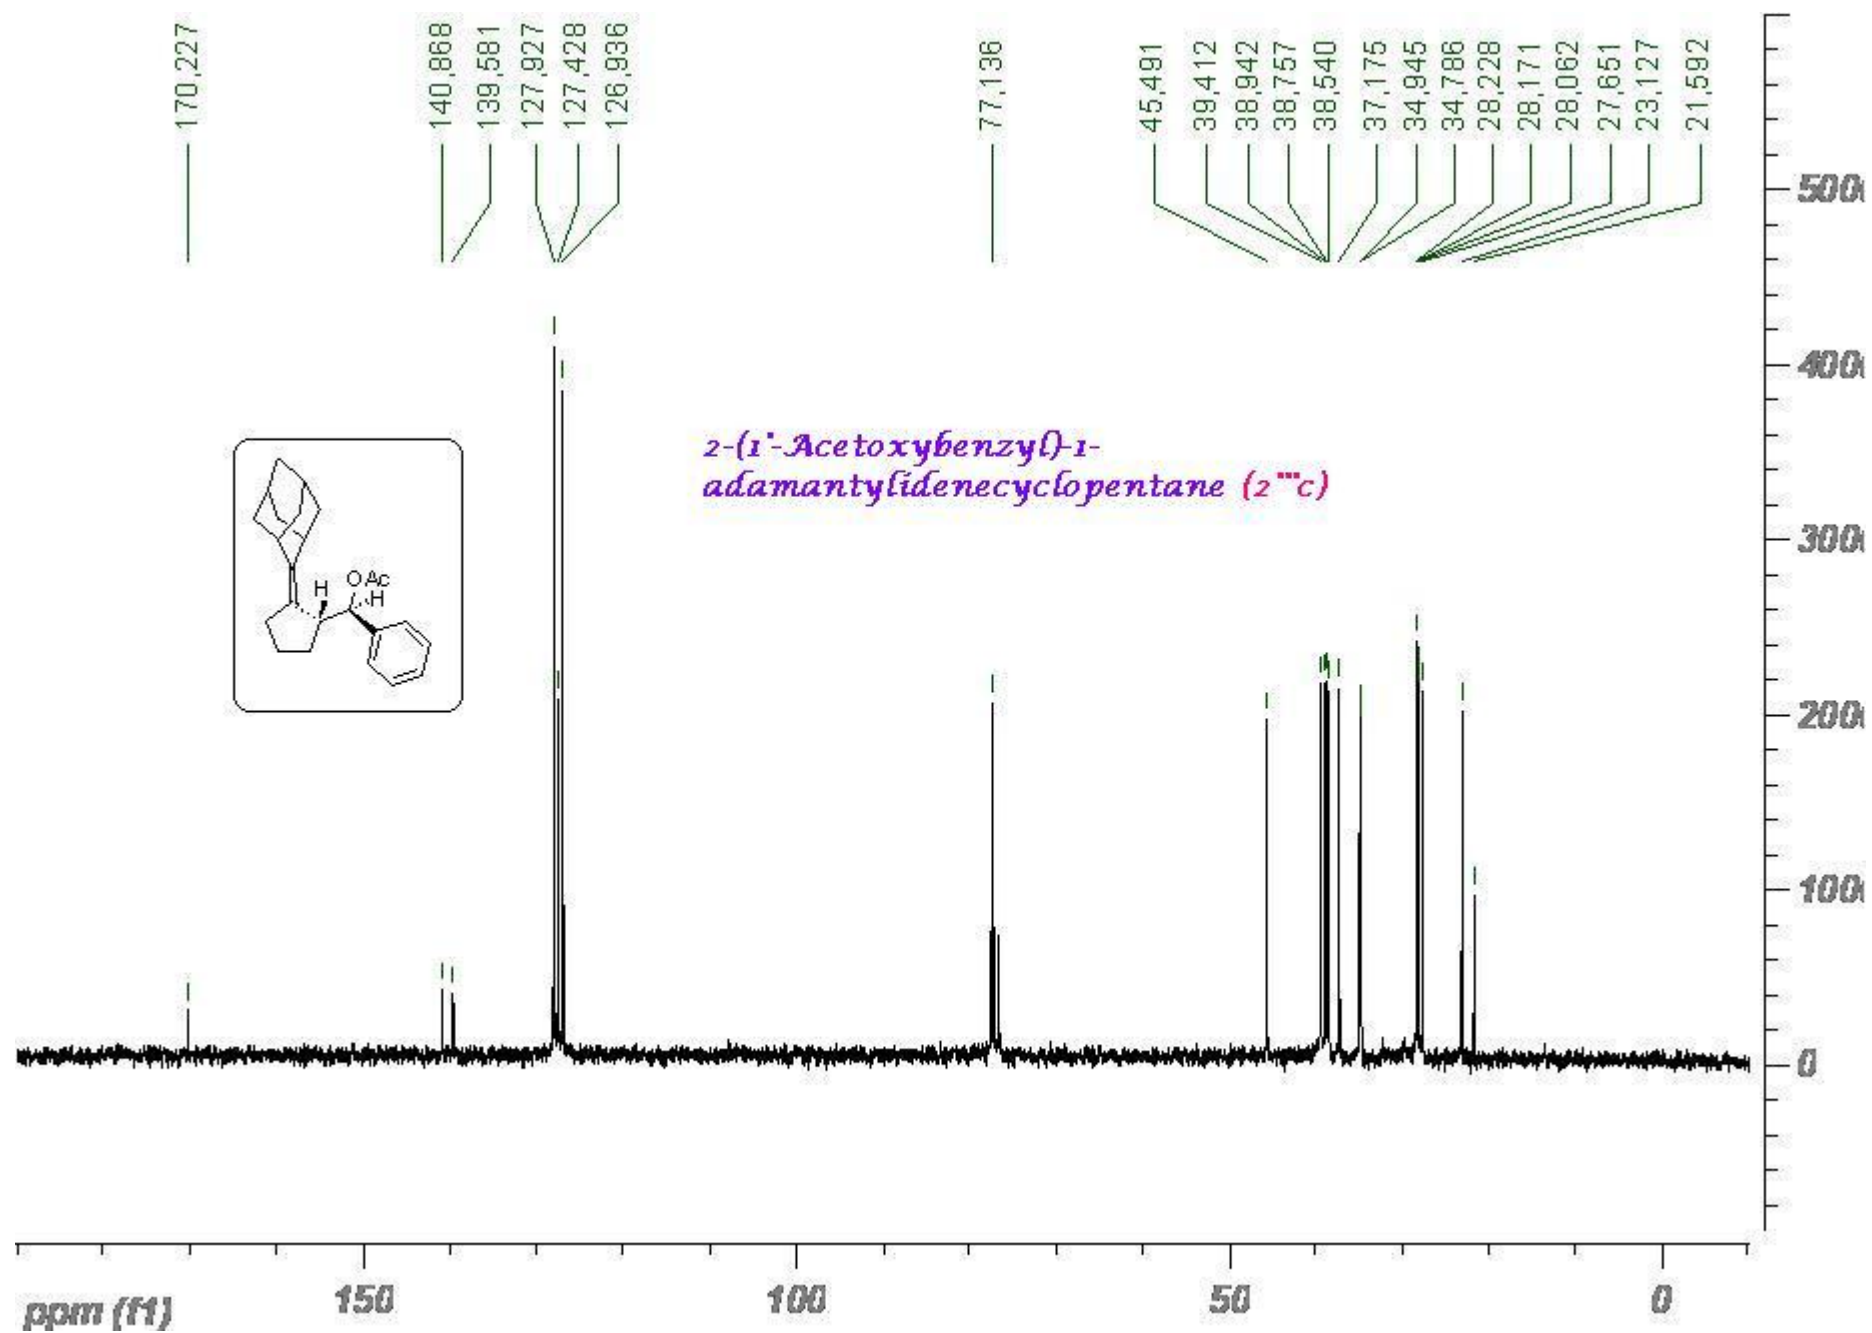

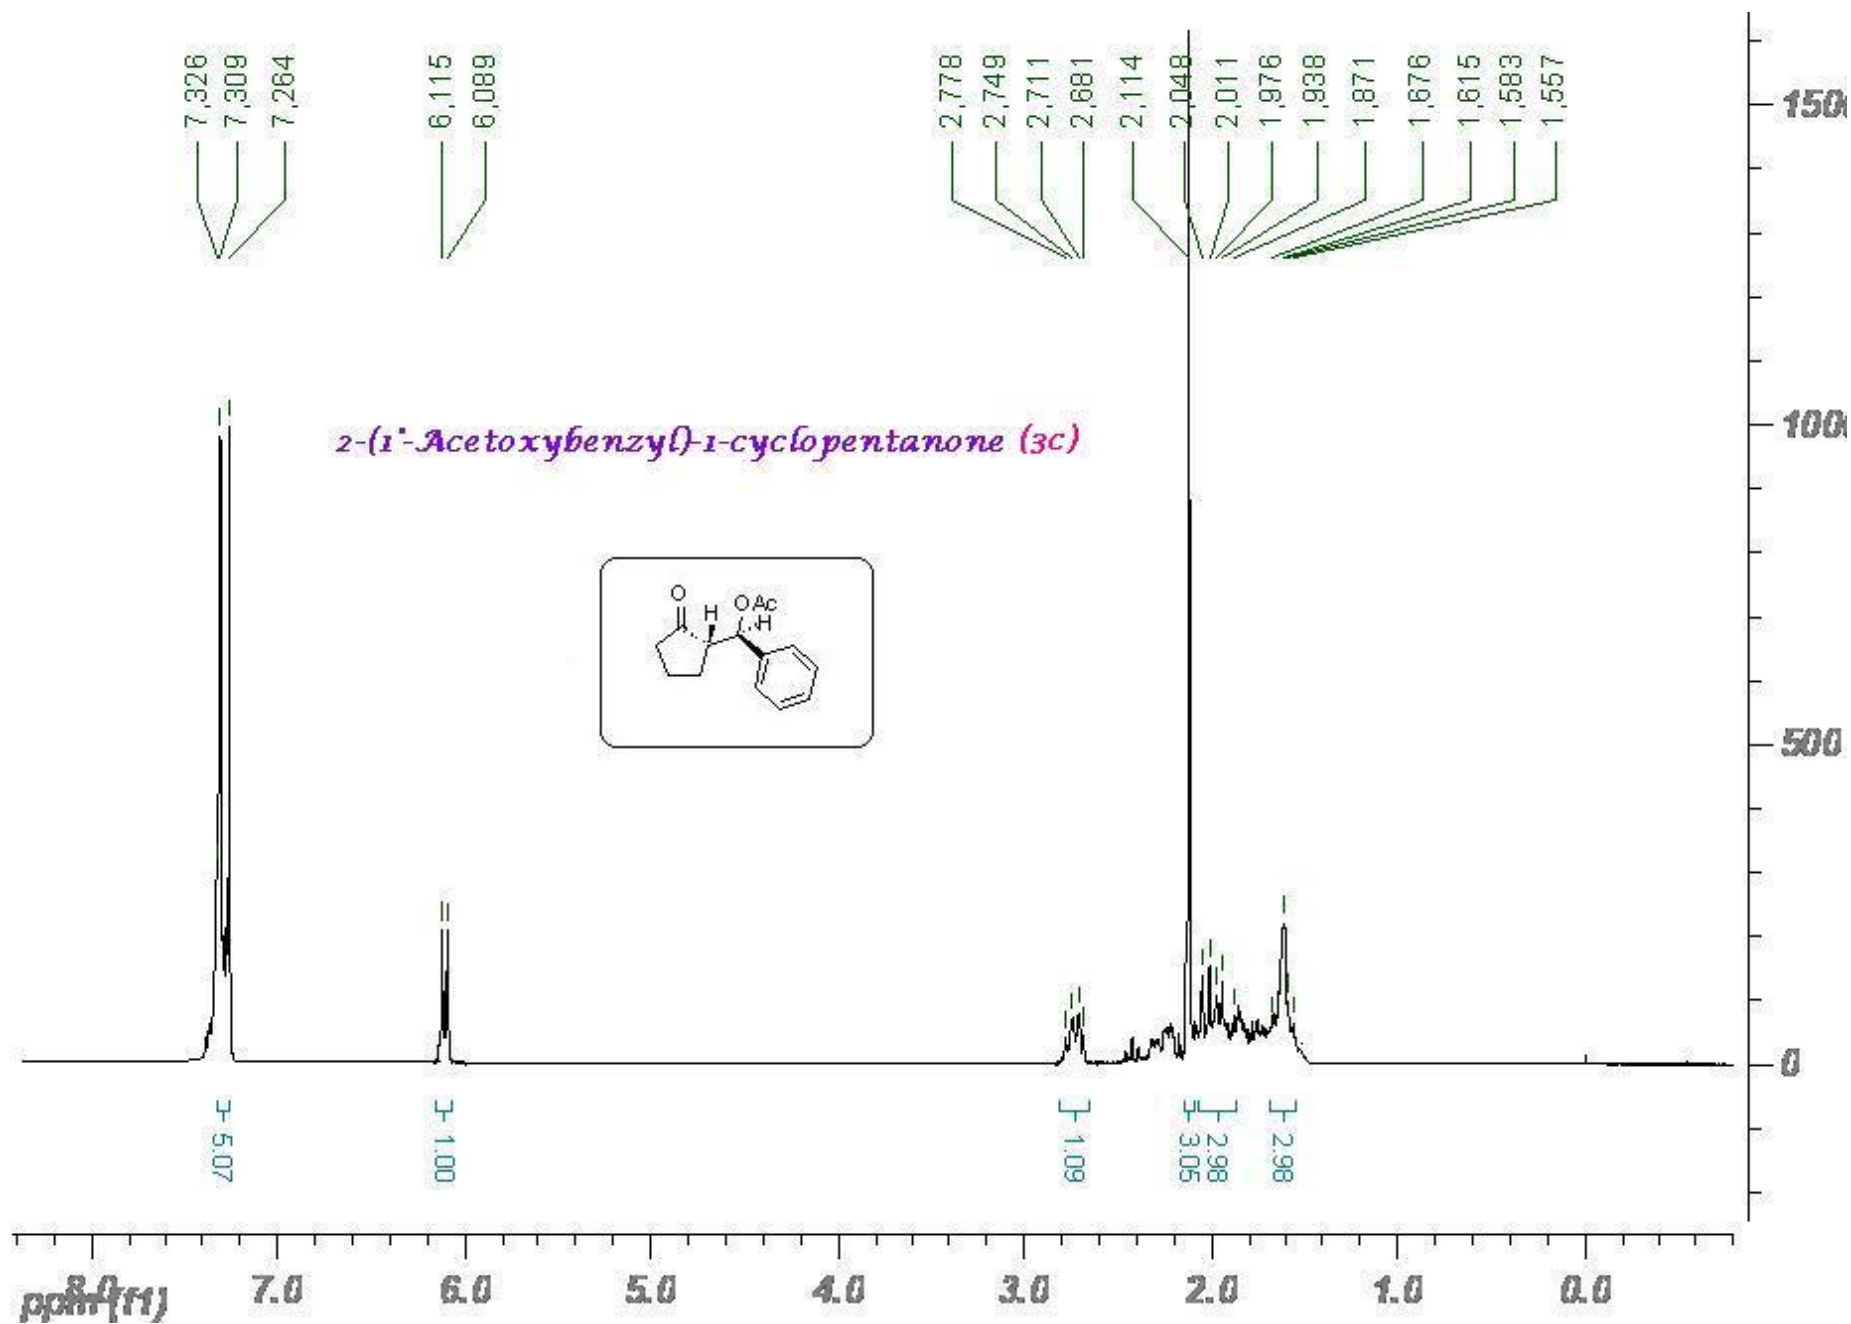

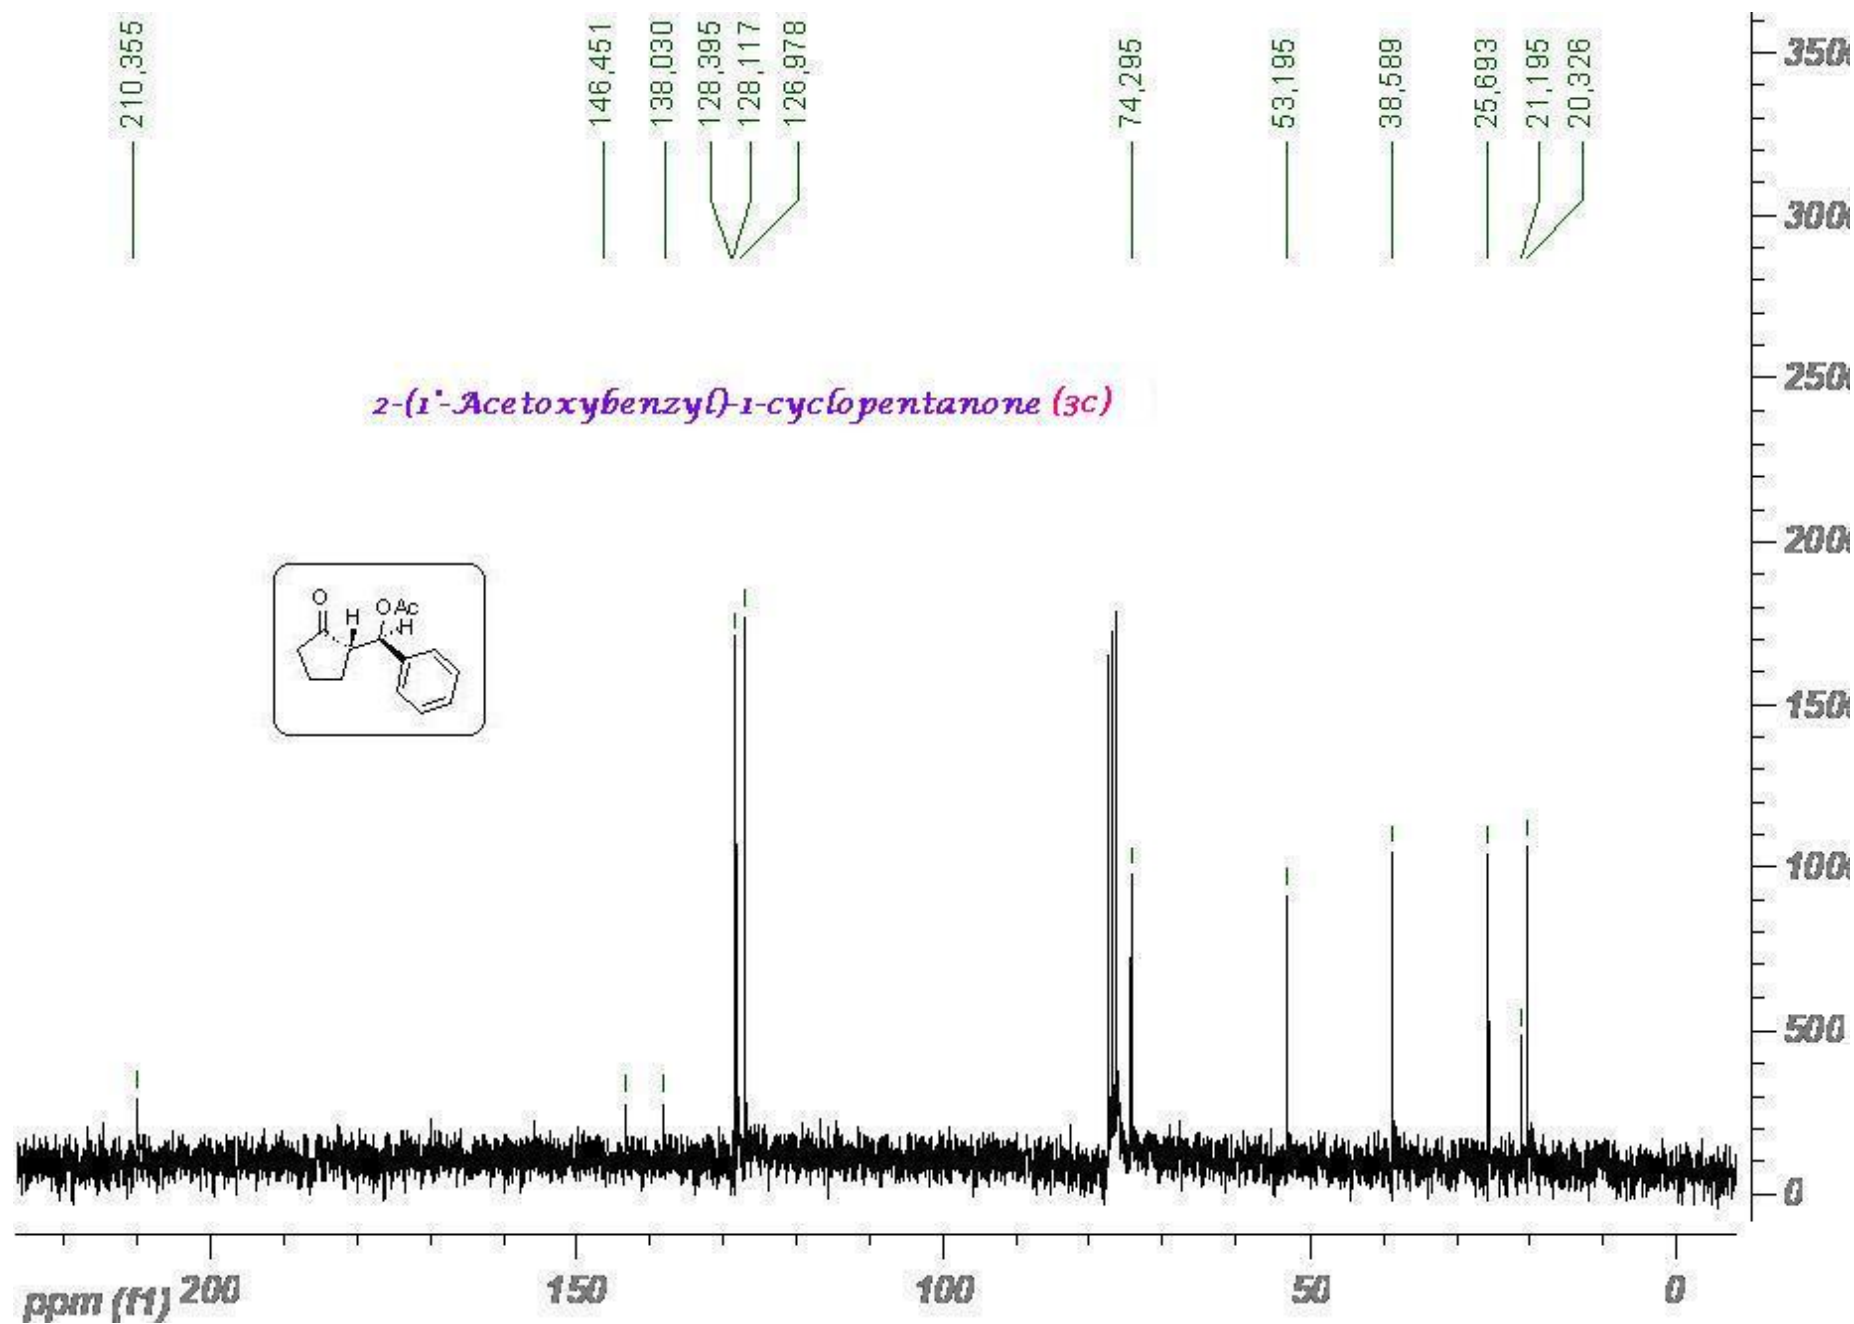

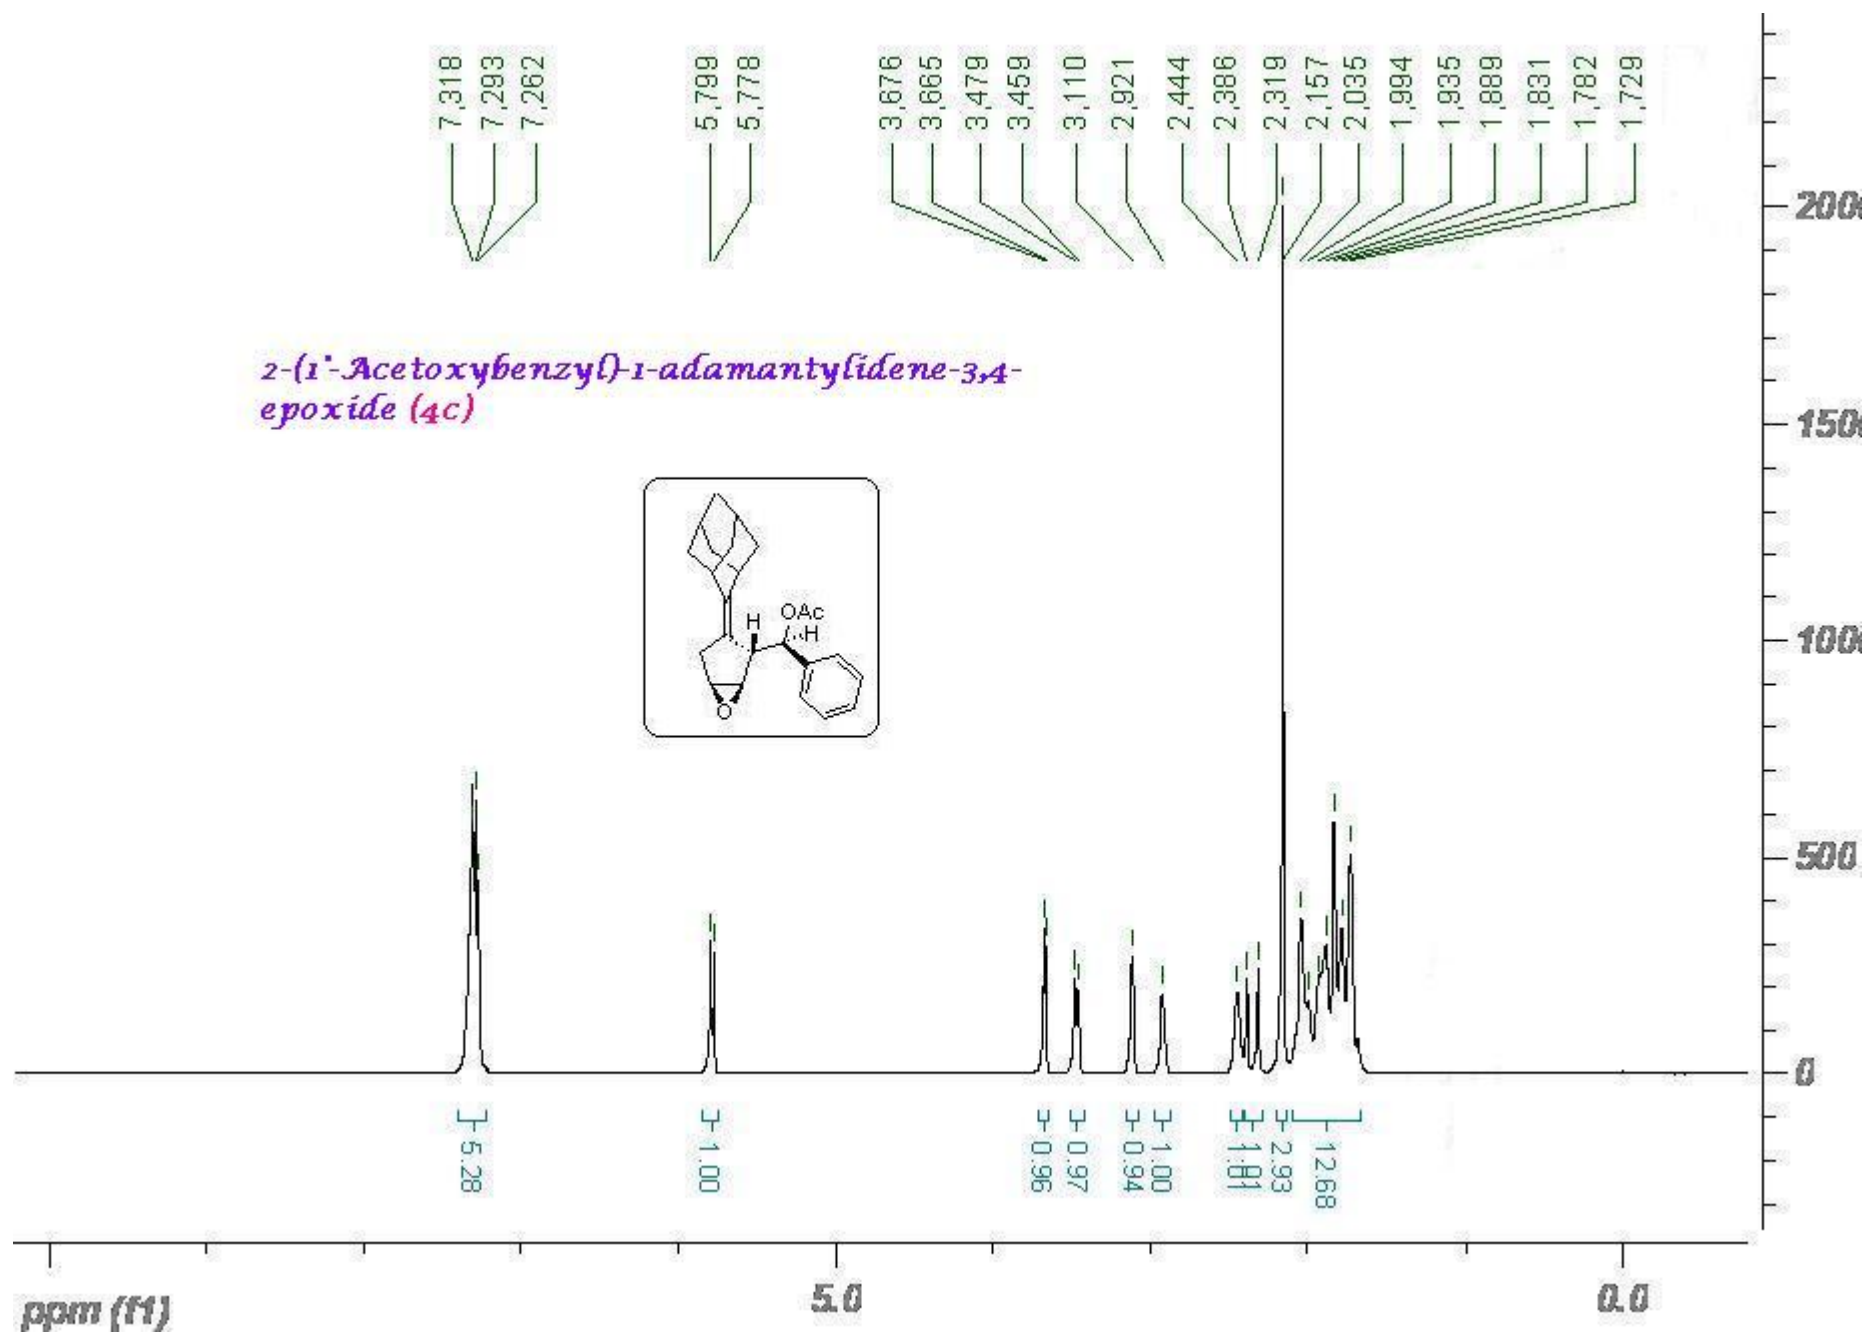

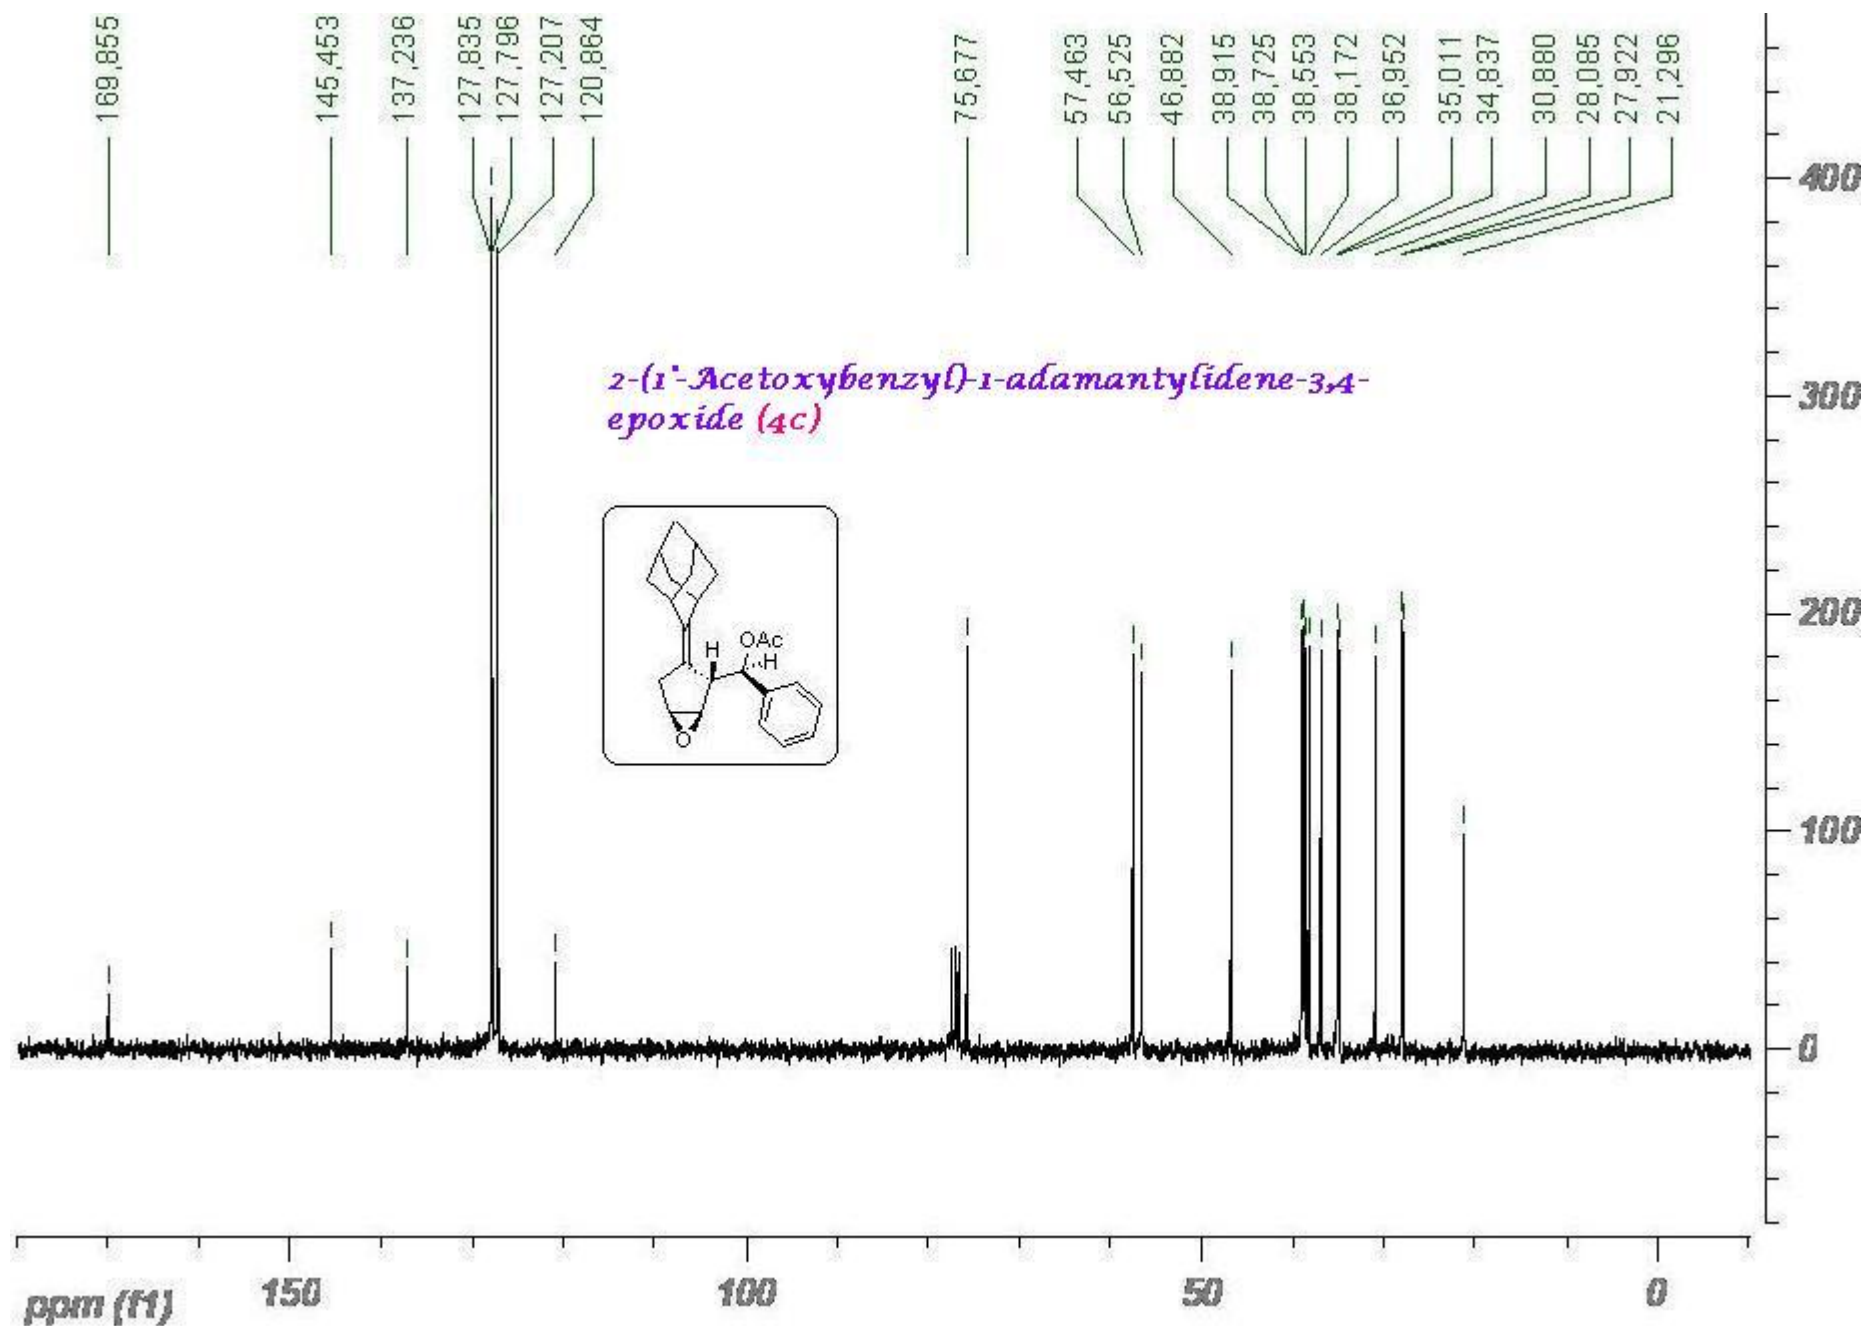

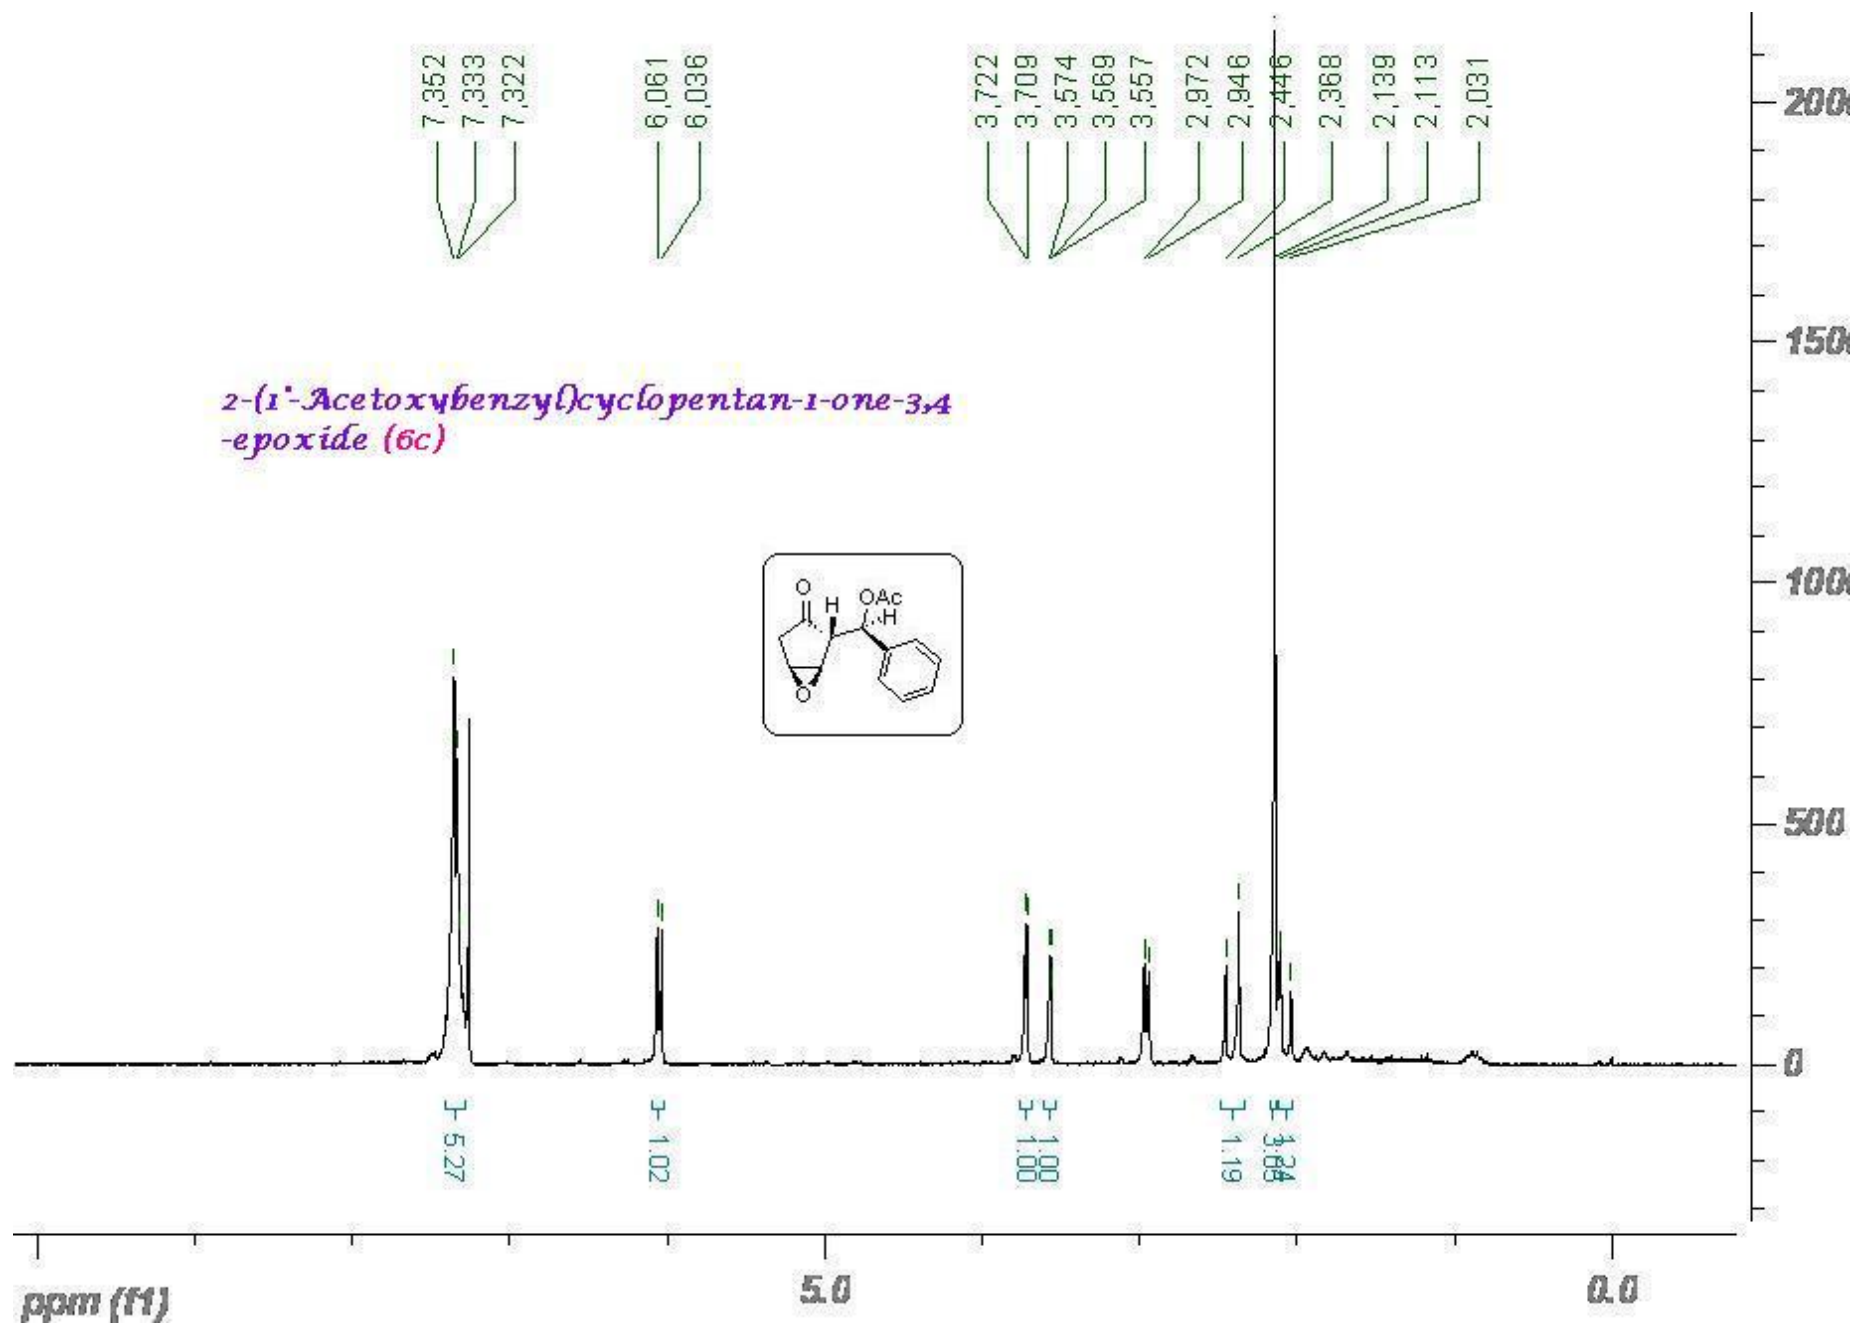



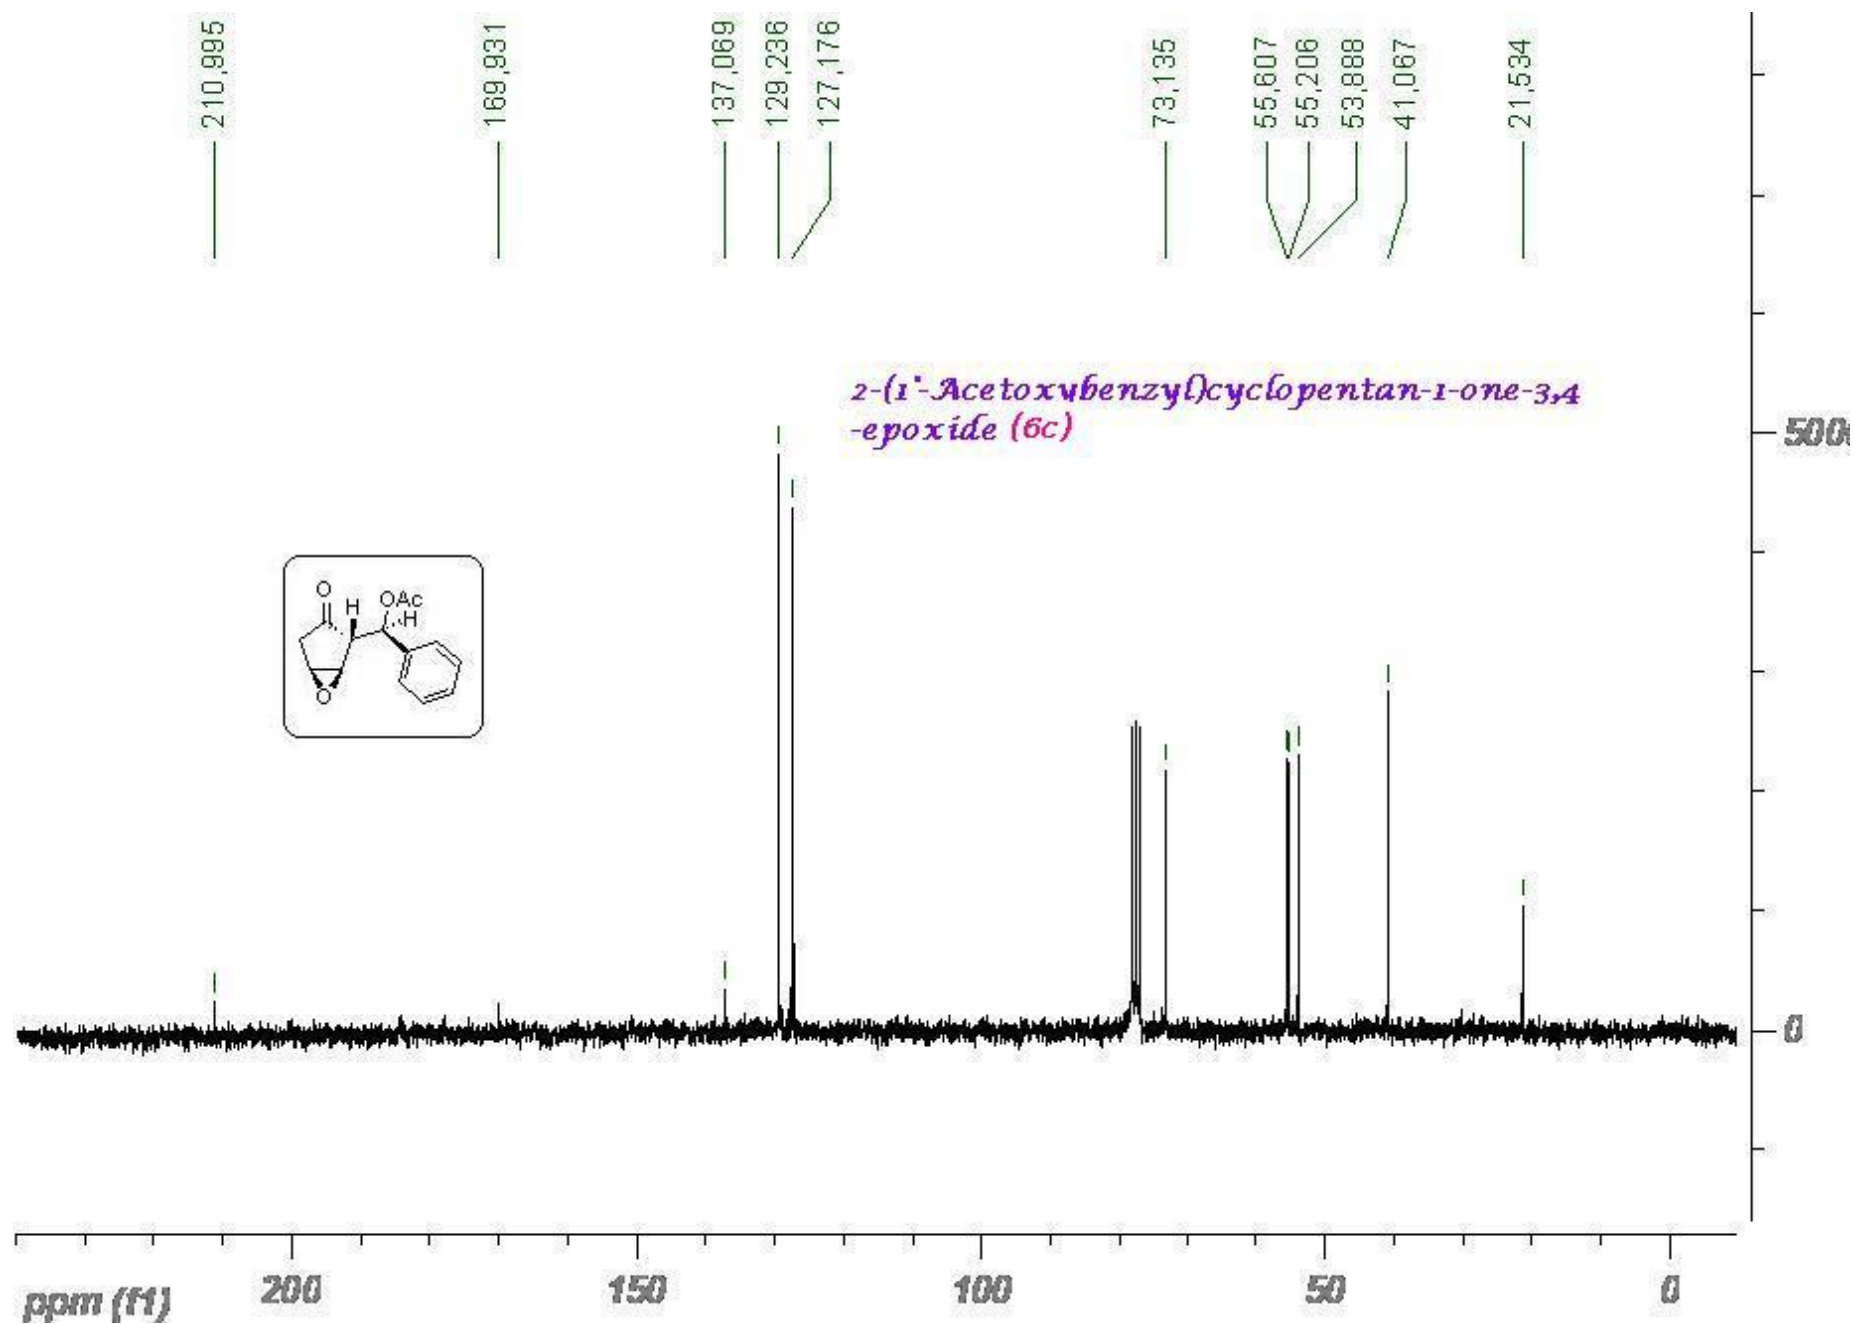

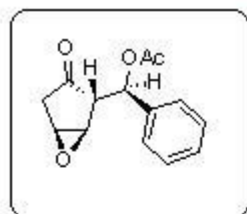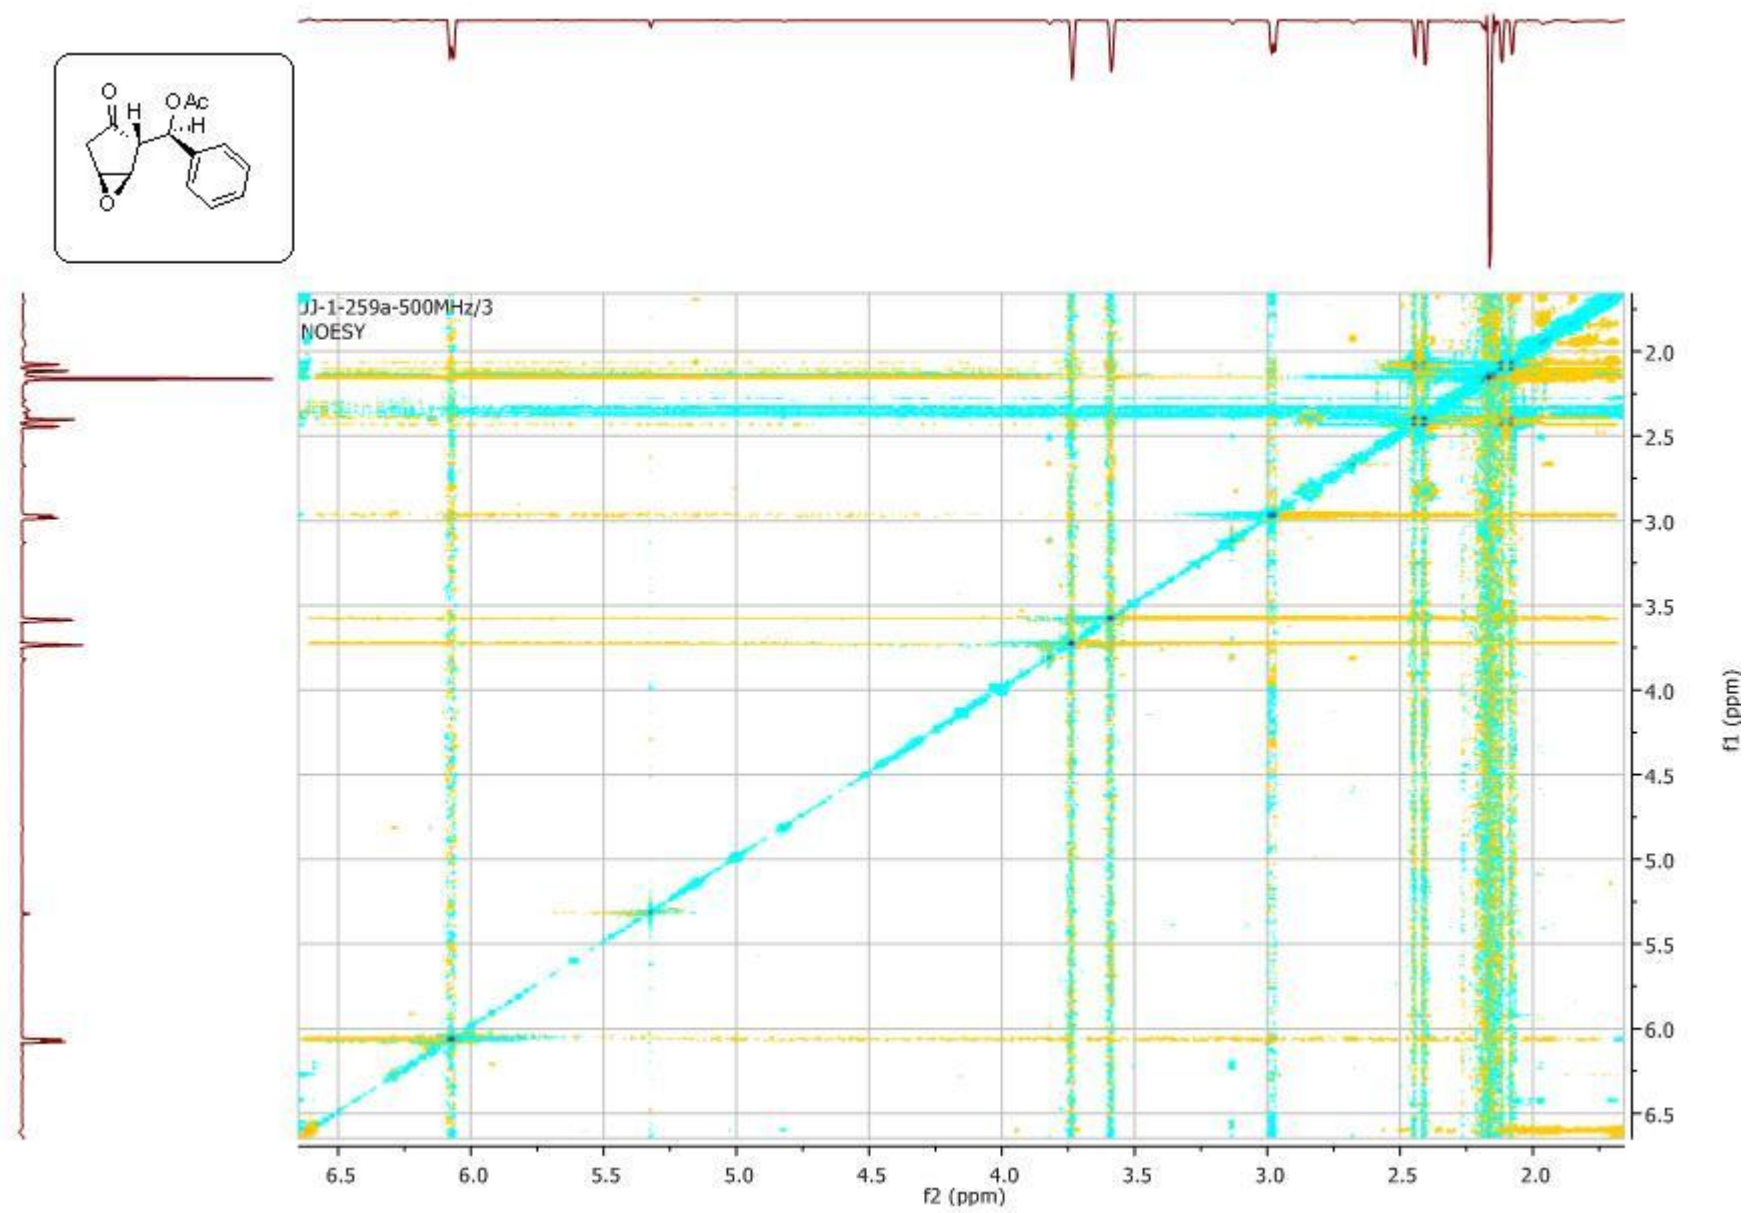

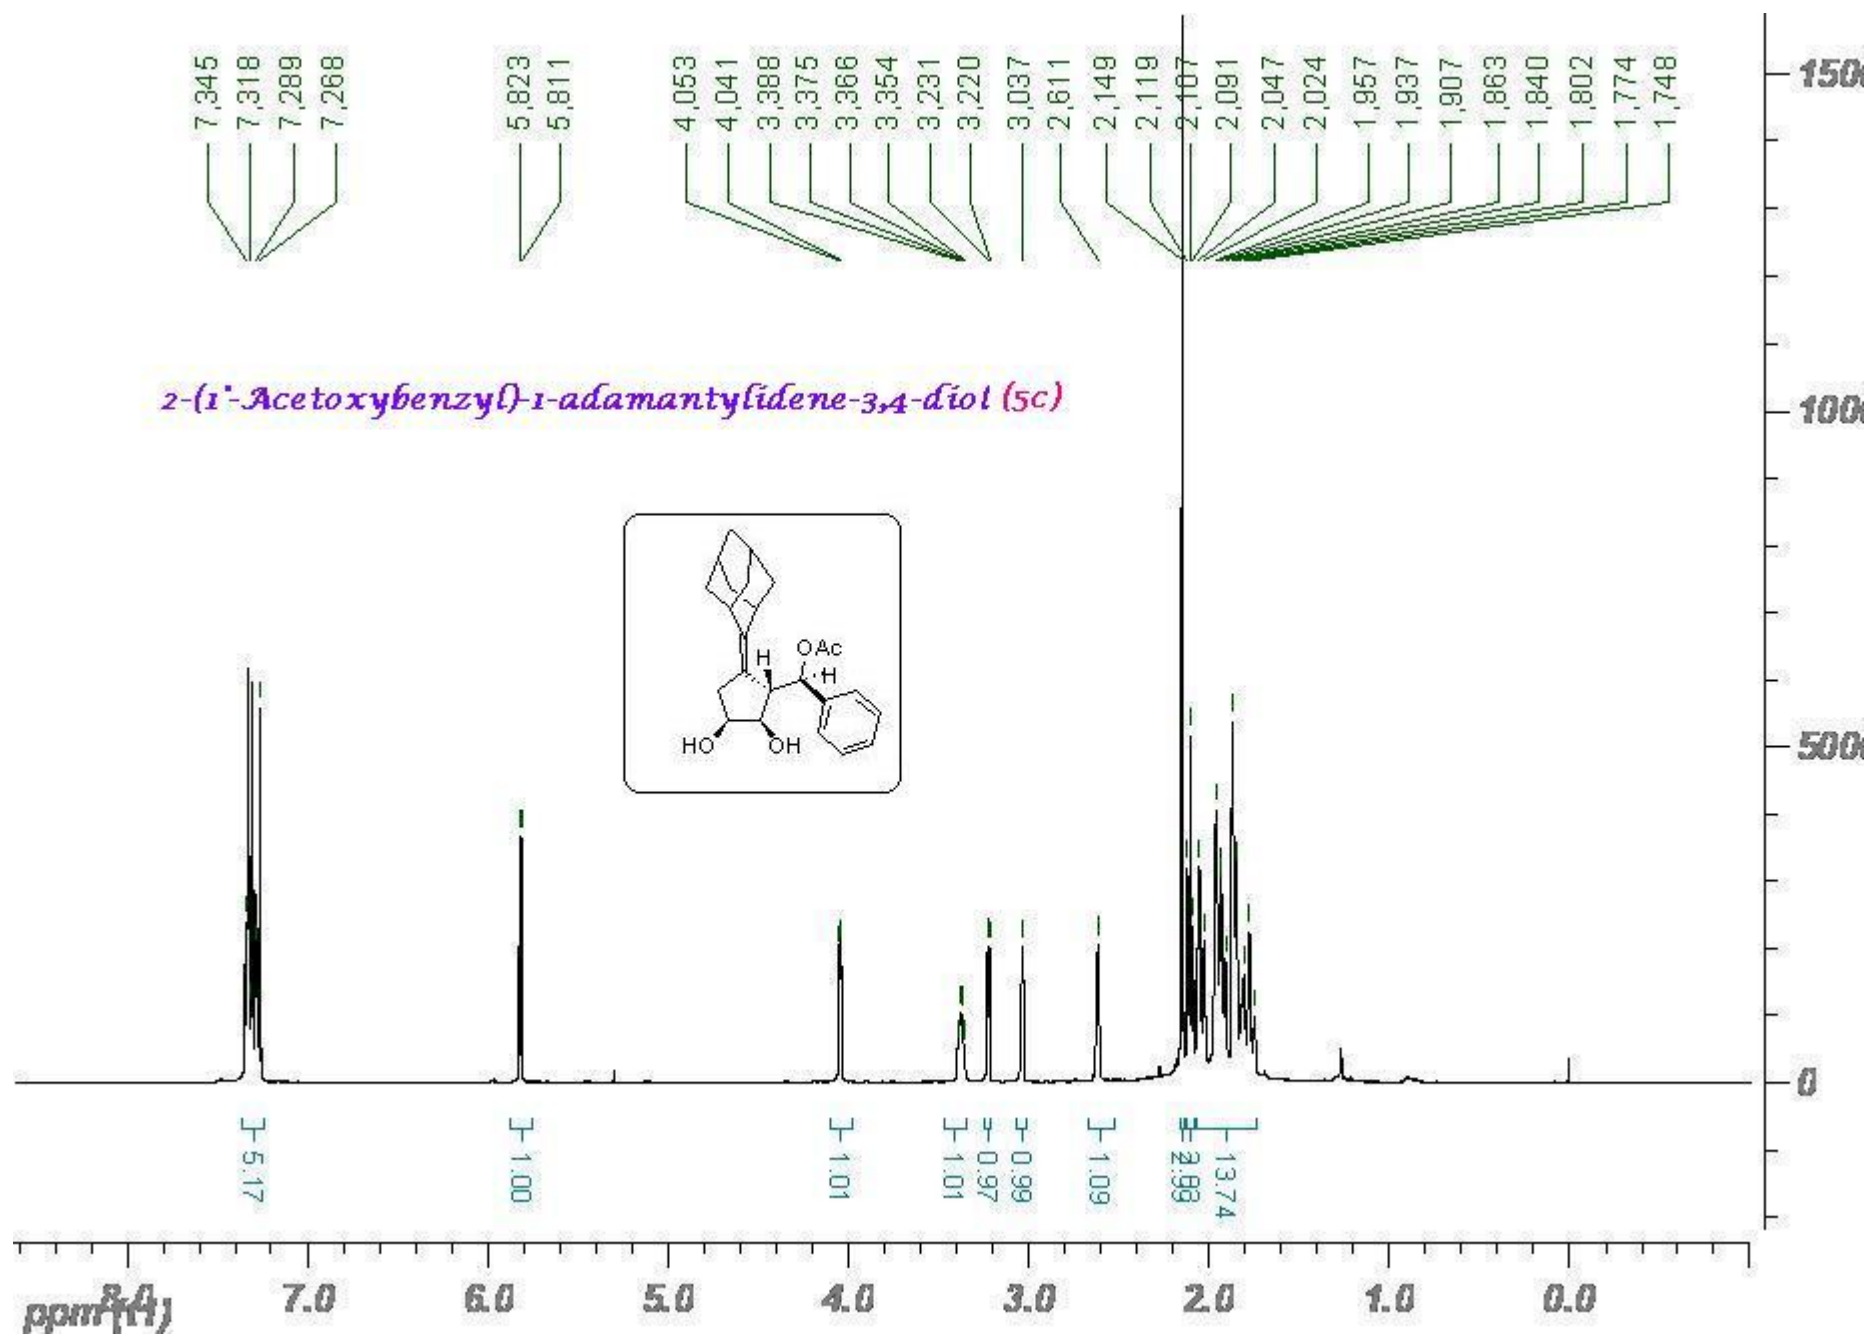

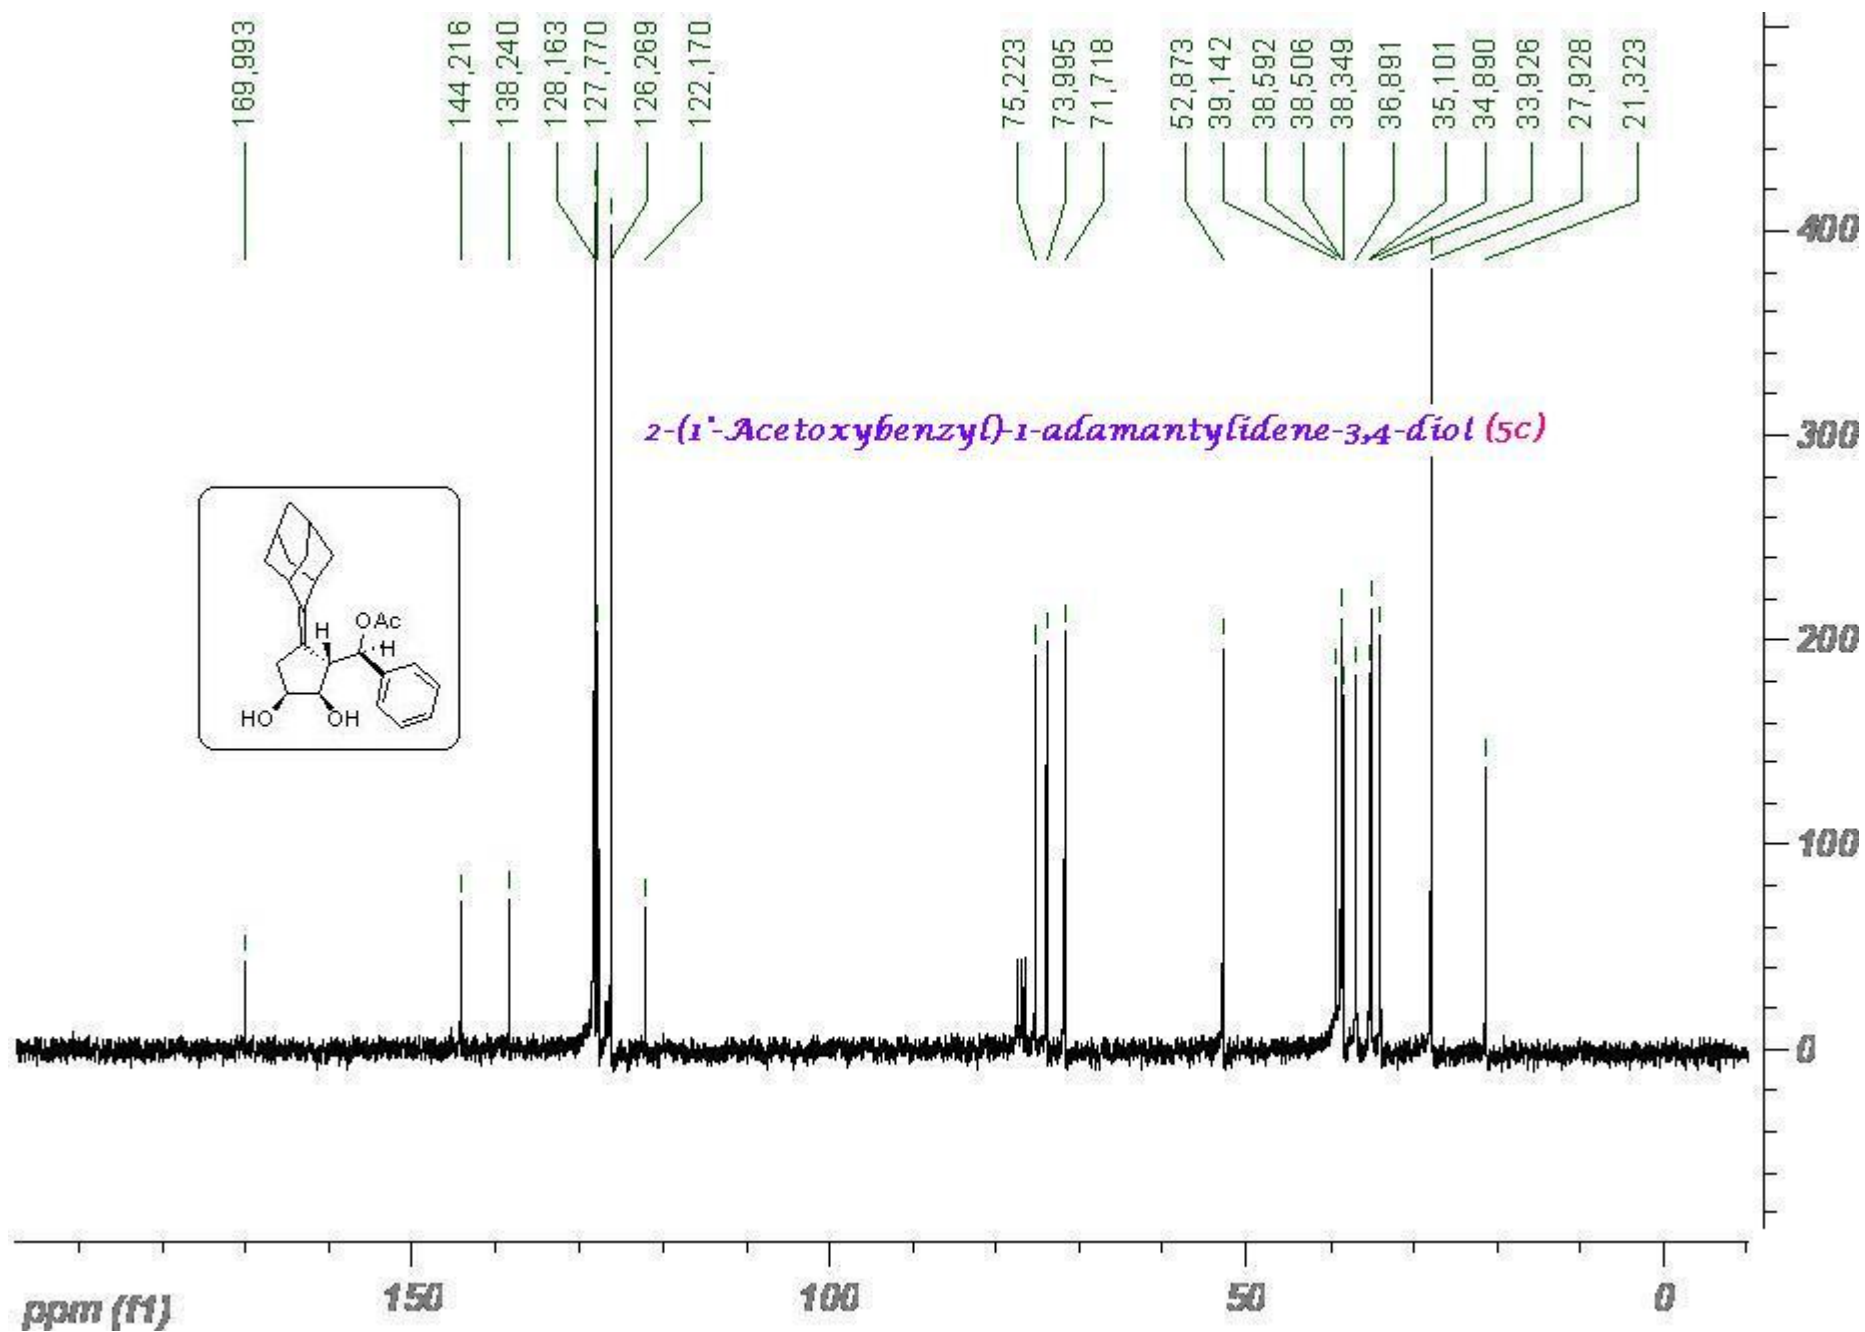

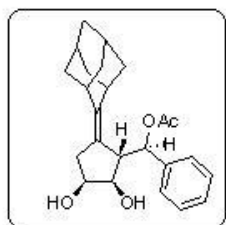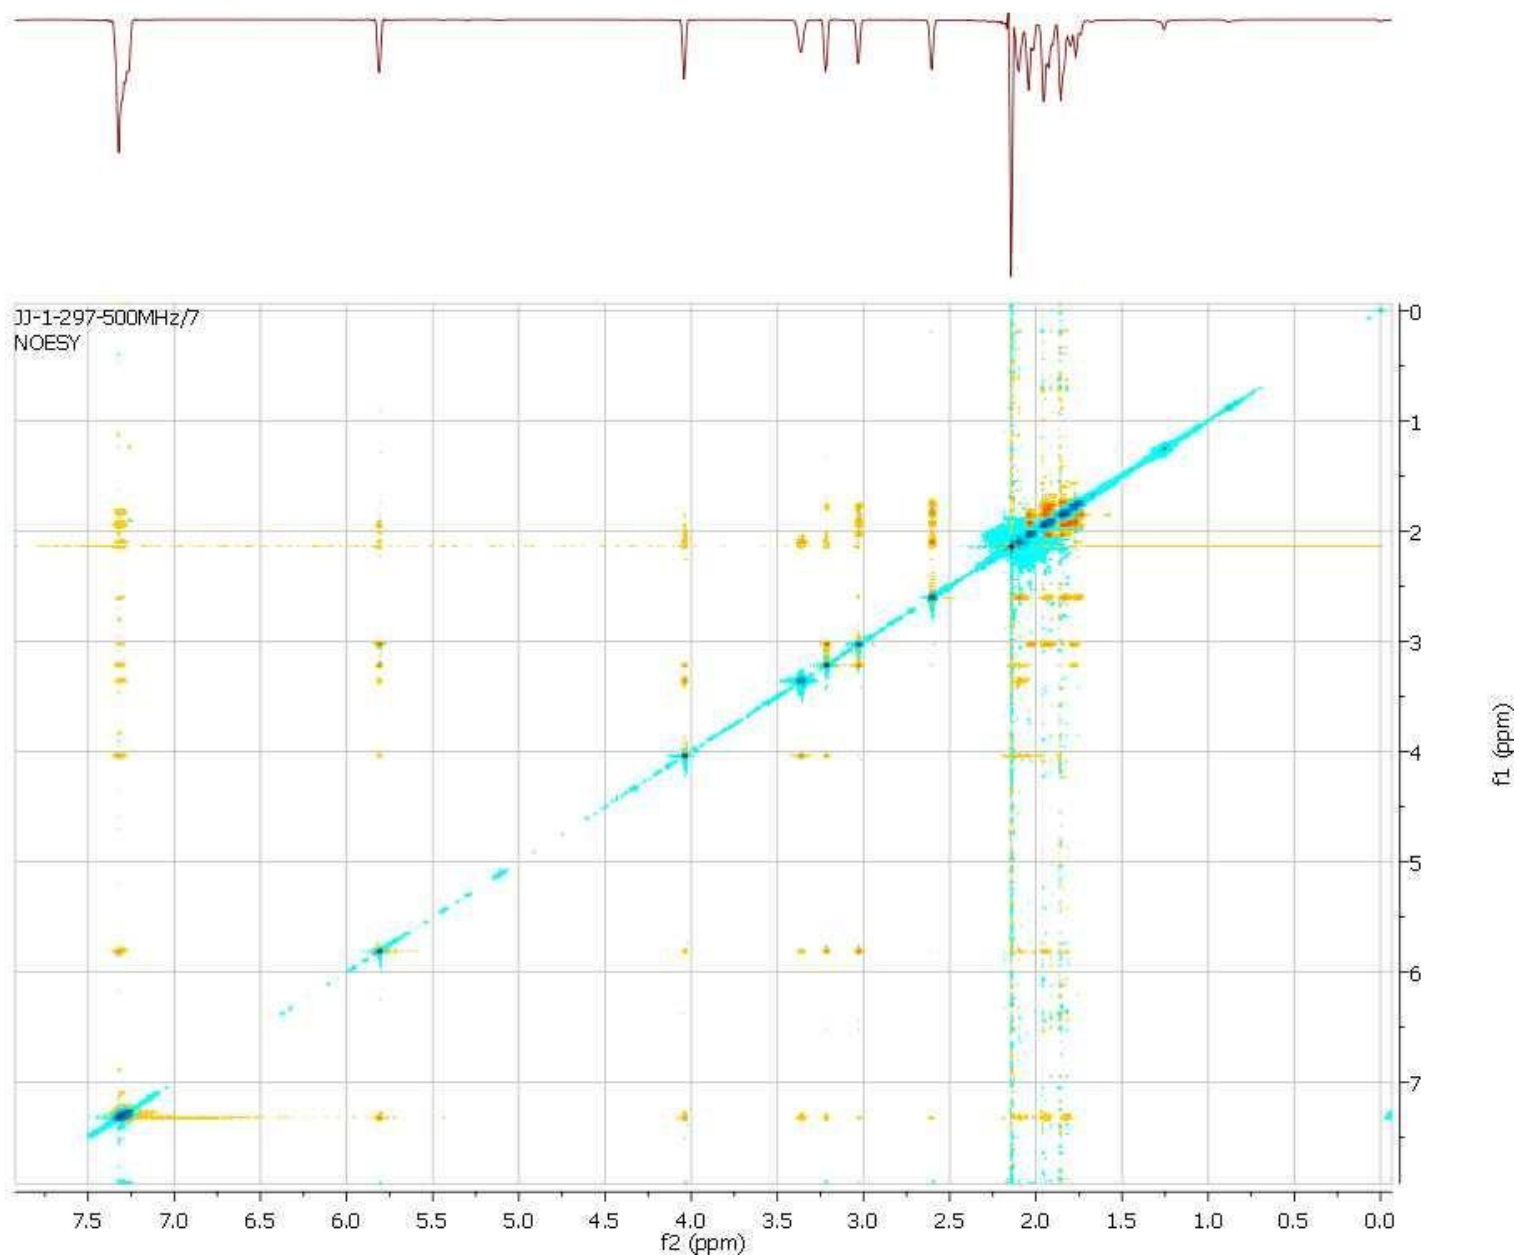

Supplement: c3cc41826j.pdf [file c3cc41826j.pdf]
